# Supplementary material for: Aluminum complexes incorporating symmetrical and asymmetrical tridentate pincer type pyrrolyl ligands: synthesis, characterization and reactivity study
Source: Royal Society of Chemistry journal article supplement (doi:10.1039/c3dt51133b), 2013-01-01
Supplement: c3dt51133b.pdf [file c3dt51133b.pdf]

Table 1. Crystal data and structure refinement for compound 10—ccdc-936572.

|                                   |                                                                |                  |
|-----------------------------------|----------------------------------------------------------------|------------------|
| Identification code               | compound 10—ccdc-936572                                        |                  |
| Empirical formula                 | C <sub>17</sub> H <sub>37</sub> Al <sub>2</sub> N <sub>3</sub> |                  |
| Formula weight                    | 337.46                                                         |                  |
| Temperature                       | 149(2) K                                                       |                  |
| Wavelength                        | 0.71073 Å                                                      |                  |
| Crystal system                    | Monoclinic                                                     |                  |
| Space group                       | P 2 <sub>1</sub> /n                                            |                  |
| Unit cell dimensions              | a = 11.2028(4) Å                                               | α = 90°.         |
|                                   | b = 17.9524(6) Å                                               | β = 112.398(2)°. |
|                                   | c = 11.7448(4) Å                                               | γ = 90°.         |
| Volume                            | 2183.88(13) Å <sup>3</sup>                                     |                  |
| Z                                 | 4                                                              |                  |
| Density (calculated)              | 1.026 Mg/m <sup>3</sup>                                        |                  |
| Absorption coefficient            | 0.135 mm <sup>-1</sup>                                         |                  |
| F(000)                            | 744                                                            |                  |
| Crystal size                      | 0.30 x 0.25 x 0.20 mm <sup>3</sup>                             |                  |
| Theta range for data collection   | 2.94 to 28.74°.                                                |                  |
| Index ranges                      | -15 ≤ h ≤ 15, -24 ≤ k ≤ 24, -15 ≤ l ≤ 15                       |                  |
| Reflections collected             | 31678                                                          |                  |
| Independent reflections           | 5646 [R(int) = 0.0363]                                         |                  |
| Completeness to theta = 28.74°    | 99.7 %                                                         |                  |
| Absorption correction             | Semi-empirical from equivalents                                |                  |
| Max. and min. transmission        | 0.973 and 0.960                                                |                  |
| Refinement method                 | Full-matrix least-squares on F <sup>2</sup>                    |                  |
| Data / restraints / parameters    | 5646 / 0 / 209                                                 |                  |
| Goodness-of-fit on F <sup>2</sup> | 1.035                                                          |                  |
| Final R indices [I > 2σ(I)]       | R1 = 0.0356, wR2 = 0.0910                                      |                  |
| R indices (all data)              | R1 = 0.0490, wR2 = 0.0990                                      |                  |
| Largest diff. peak and hole       | 0.278 and -0.209 e.Å <sup>-3</sup>                             |                  |

Table 2. Atomic coordinates ( $\times 10^4$ ) and equivalent isotropic displacement parameters ( $\text{\AA}^2 \times 10^3$ ) for pei292\_0m.  $U(\text{eq})$  is defined as one third of the trace of the orthogonalized  $U^{ij}$  tensor.

|       | x       | y        | z        | $U(\text{eq})$ |
|-------|---------|----------|----------|----------------|
| Al(1) | 2185(1) | 8590(1)  | 9630(1)  | 23(1)          |
| Al(2) | 3539(1) | 10177(1) | 6119(1)  | 24(1)          |
| N(1)  | 1836(1) | 8587(1)  | 11207(1) | 25(1)          |
| N(2)  | 2352(1) | 9637(1)  | 9858(1)  | 20(1)          |
| N(3)  | 2675(1) | 10433(1) | 7322(1)  | 23(1)          |
| C(1)  | 1208(1) | 7938(1)  | 11589(1) | 32(1)          |
| C(2)  | 1382(2) | 8025(1)  | 12934(2) | 54(1)          |
| C(3)  | -220(1) | 7897(1)  | 10772(2) | 41(1)          |
| C(4)  | 1891(1) | 7238(1)  | 11420(2) | 45(1)          |
| C(5)  | 1288(1) | 9342(1)  | 11273(1) | 26(1)          |
| C(6)  | 1967(1) | 9888(1)  | 10772(1) | 22(1)          |
| C(7)  | 2331(1) | 10615(1) | 11060(1) | 25(1)          |
| C(8)  | 2978(1) | 10830(1) | 10284(1) | 25(1)          |
| C(9)  | 2977(1) | 10226(1) | 9561(1)  | 21(1)          |
| C(10) | 701(1)  | 8267(1)  | 8182(1)  | 38(1)          |
| C(11) | 3836(1) | 8094(1)  | 9923(1)  | 35(1)          |
| C(12) | 3522(1) | 10153(1) | 8591(1)  | 22(1)          |
| C(13) | 1389(1) | 10073(1) | 6908(1)  | 38(1)          |
| C(14) | 2501(1) | 11251(1) | 7350(1)  | 34(1)          |
| C(15) | 5119(1) | 10801(1) | 6711(1)  | 34(1)          |
| C(16) | 2226(1) | 10431(1) | 4485(1)  | 36(1)          |
| C(17) | 3886(2) | 9098(1)  | 6347(2)  | 44(1)          |

Table 3. Bond lengths [ $\text{\AA}$ ] and angles [ $^\circ$ ] for pei292\_0m.

---

|                   |            |
|-------------------|------------|
| Al(1)-N(2)        | 1.8971(10) |
| Al(1)-C(10)       | 1.9588(14) |
| Al(1)-C(11)       | 1.9616(14) |
| Al(1)-N(1)        | 2.0337(11) |
| Al(2)-C(17)       | 1.9734(15) |
| Al(2)-C(16)       | 1.9760(14) |
| Al(2)-C(15)       | 1.9827(14) |
| Al(2)-N(3)        | 2.0466(11) |
| N(1)-C(5)         | 1.5011(16) |
| N(1)-C(1)         | 1.5159(16) |
| N(2)-C(6)         | 1.3764(15) |
| N(2)-C(9)         | 1.3840(15) |
| N(3)-C(13)        | 1.4813(16) |
| N(3)-C(14)        | 1.4842(17) |
| N(3)-C(12)        | 1.5154(14) |
| C(1)-C(4)         | 1.522(2)   |
| C(1)-C(3)         | 1.5221(19) |
| C(1)-C(2)         | 1.524(2)   |
| C(5)-C(6)         | 1.4929(16) |
| C(6)-C(7)         | 1.3714(17) |
| C(7)-C(8)         | 1.4168(17) |
| C(8)-C(9)         | 1.3773(17) |
| C(9)-C(12)        | 1.4890(16) |
|                   |            |
| N(2)-Al(1)-C(10)  | 114.91(6)  |
| N(2)-Al(1)-C(11)  | 112.93(5)  |
| C(10)-Al(1)-C(11) | 116.70(7)  |
| N(2)-Al(1)-N(1)   | 85.26(4)   |
| C(10)-Al(1)-N(1)  | 113.31(6)  |
| C(11)-Al(1)-N(1)  | 109.54(6)  |
| C(17)-Al(2)-C(16) | 113.20(7)  |
| C(17)-Al(2)-C(15) | 113.77(7)  |
| C(16)-Al(2)-C(15) | 116.42(6)  |
| C(17)-Al(2)-N(3)  | 104.28(6)  |

|                  |            |
|------------------|------------|
| C(16)-Al(2)-N(3) | 104.24(5)  |
| C(15)-Al(2)-N(3) | 103.02(5)  |
| C(5)-N(1)-C(1)   | 115.71(10) |
| C(5)-N(1)-Al(1)  | 105.60(7)  |
| C(1)-N(1)-Al(1)  | 122.95(9)  |
| C(6)-N(2)-C(9)   | 106.60(9)  |
| C(6)-N(2)-Al(1)  | 112.98(8)  |
| C(9)-N(2)-Al(1)  | 138.89(8)  |
| C(13)-N(3)-C(14) | 108.65(11) |
| C(13)-N(3)-C(12) | 110.16(10) |
| C(14)-N(3)-C(12) | 110.17(10) |
| C(13)-N(3)-Al(2) | 109.41(8)  |
| C(14)-N(3)-Al(2) | 109.72(8)  |
| C(12)-N(3)-Al(2) | 108.72(7)  |
| N(1)-C(1)-C(4)   | 106.42(11) |
| N(1)-C(1)-C(3)   | 110.20(10) |
| C(4)-C(1)-C(3)   | 109.73(13) |
| N(1)-C(1)-C(2)   | 109.70(12) |
| C(4)-C(1)-C(2)   | 110.41(13) |
| C(3)-C(1)-C(2)   | 110.32(13) |
| C(6)-C(5)-N(1)   | 106.99(10) |
| C(7)-C(6)-N(2)   | 110.57(10) |
| C(7)-C(6)-C(5)   | 132.59(11) |
| N(2)-C(6)-C(5)   | 116.83(10) |
| C(6)-C(7)-C(8)   | 106.15(11) |
| C(9)-C(8)-C(7)   | 107.53(11) |
| C(8)-C(9)-N(2)   | 109.15(10) |
| C(8)-C(9)-C(12)  | 129.58(11) |
| N(2)-C(9)-C(12)  | 121.27(10) |
| C(9)-C(12)-N(3)  | 115.93(9)  |

---

Symmetry transformations used to generate equivalent atoms:

Table 4. Anisotropic displacement parameters ( $\text{\AA}^2 \times 10^3$ ) for pei292\_0m. The anisotropic displacement factor exponent takes the form:  $-2\pi^2 [ h^2 a^{*2} U^{11} + \dots + 2 h k a^* b^* U^{12} ]$

|       | $U^{11}$ | $U^{22}$ | $U^{33}$ | $U^{23}$ | $U^{13}$ | $U^{12}$ |
|-------|----------|----------|----------|----------|----------|----------|
| Al(1) | 22(1)    | 20(1)    | 24(1)    | -2(1)    | 6(1)     | -2(1)    |
| Al(2) | 25(1)    | 28(1)    | 20(1)    | 0(1)     | 8(1)     | 1(1)     |
| N(1)  | 20(1)    | 25(1)    | 26(1)    | 5(1)     | 6(1)     | -1(1)    |
| N(2)  | 22(1)    | 21(1)    | 18(1)    | 0(1)     | 7(1)     | -1(1)    |
| N(3)  | 20(1)    | 29(1)    | 20(1)    | 4(1)     | 6(1)     | 2(1)     |
| C(1)  | 25(1)    | 30(1)    | 39(1)    | 14(1)    | 11(1)    | 0(1)     |
| C(2)  | 60(1)    | 61(1)    | 44(1)    | 22(1)    | 23(1)    | -6(1)    |
| C(3)  | 26(1)    | 33(1)    | 61(1)    | 13(1)    | 14(1)    | -3(1)    |
| C(4)  | 32(1)    | 30(1)    | 70(1)    | 19(1)    | 16(1)    | 4(1)     |
| C(5)  | 28(1)    | 27(1)    | 25(1)    | 1(1)     | 12(1)    | 0(1)     |
| C(6)  | 22(1)    | 25(1)    | 19(1)    | 1(1)     | 8(1)     | 0(1)     |
| C(7)  | 30(1)    | 24(1)    | 20(1)    | -2(1)    | 9(1)     | 0(1)     |
| C(8)  | 28(1)    | 22(1)    | 22(1)    | -1(1)    | 7(1)     | -3(1)    |
| C(9)  | 20(1)    | 24(1)    | 19(1)    | 2(1)     | 5(1)     | -1(1)    |
| C(10) | 39(1)    | 33(1)    | 33(1)    | -5(1)    | 2(1)     | -8(1)    |
| C(11) | 32(1)    | 30(1)    | 46(1)    | -4(1)    | 16(1)    | 2(1)     |
| C(12) | 20(1)    | 27(1)    | 19(1)    | 3(1)     | 6(1)     | 2(1)     |
| C(13) | 22(1)    | 62(1)    | 26(1)    | 4(1)     | 6(1)     | -8(1)    |
| C(14) | 42(1)    | 32(1)    | 31(1)    | 8(1)     | 17(1)    | 13(1)    |
| C(15) | 25(1)    | 46(1)    | 31(1)    | 2(1)     | 12(1)    | -2(1)    |
| C(16) | 34(1)    | 49(1)    | 23(1)    | 2(1)     | 8(1)     | -5(1)    |
| C(17) | 62(1)    | 34(1)    | 39(1)    | -1(1)    | 24(1)    | 10(1)    |

Table 5. Hydrogen coordinates ( $\times 10^4$ ) and isotropic displacement parameters ( $\text{\AA}^2 \times 10^{-3}$ ) for pei292\_0m.

|        | x    | y     | z     | U(eq) |
|--------|------|-------|-------|-------|
| H(1)   | 2675 | 8612  | 11778 | 30    |
| H(2A)  | 2302 | 8080  | 13444 | 81    |
| H(2B)  | 1042 | 7583  | 13198 | 81    |
| H(2C)  | 914  | 8468  | 13024 | 81    |
| H(3A)  | -657 | 8346  | 10888 | 61    |
| H(3B)  | -604 | 7457  | 10993 | 61    |
| H(3C)  | -319 | 7860  | 9908  | 61    |
| H(4A)  | 1752 | 7183  | 10548 | 67    |
| H(4B)  | 1543 | 6803  | 11691 | 67    |
| H(4C)  | 2818 | 7280  | 11910 | 67    |
| H(5A)  | 348  | 9350  | 10779 | 31    |
| H(5B)  | 1431 | 9466  | 12136 | 31    |
| H(7)   | 2181 | 10914 | 11659 | 30    |
| H(8)   | 3344 | 11305 | 10265 | 30    |
| H(10A) | -43  | 8586  | 8082  | 58    |
| H(10B) | 491  | 7749  | 8293  | 58    |
| H(10C) | 913  | 8305  | 7448  | 58    |
| H(11A) | 4138 | 8229  | 9270  | 53    |
| H(11B) | 3719 | 7553  | 9925  | 53    |
| H(11C) | 4475 | 8251  | 10722 | 53    |
| H(12A) | 3715 | 9620  | 8522  | 27    |
| H(12B) | 4351 | 10426 | 8866  | 27    |
| H(13A) | 982  | 10186 | 7494  | 56    |
| H(13B) | 1488 | 9533  | 6864  | 56    |
| H(13C) | 846  | 10263 | 6092  | 56    |
| H(14A) | 1994 | 11430 | 6517  | 51    |
| H(14B) | 3348 | 11495 | 7657  | 51    |
| H(14C) | 2048 | 11369 | 7895  | 51    |
| H(15A) | 5657 | 10677 | 6247  | 50    |
| H(15B) | 5604 | 10705 | 7589  | 50    |

|        |      |       |      |    |
|--------|------|-------|------|----|
| H(15C) | 4876 | 11328 | 6590 | 50 |
| H(16A) | 2632 | 10450 | 3879 | 54 |
| H(16B) | 1850 | 10919 | 4526 | 54 |
| H(16C) | 1546 | 10052 | 4239 | 54 |
| H(17A) | 3096 | 8838  | 6286 | 66 |
| H(17B) | 4562 | 9008  | 7160 | 66 |
| H(17C) | 4174 | 8914  | 5708 | 66 |

---





Table 1. Crystal data and structure refinement for compound 11—ccdc-936573.

|                                   |                                                     |                  |
|-----------------------------------|-----------------------------------------------------|------------------|
| Identification code               | compound 11—ccdc-936573                             |                  |
| Empirical formula                 | C <sub>21</sub> H <sub>34</sub> Al N <sub>3</sub> O |                  |
| Formula weight                    | 371.49                                              |                  |
| Temperature                       | 150(2) K                                            |                  |
| Wavelength                        | 0.71073 Å                                           |                  |
| Crystal system                    | Triclinic                                           |                  |
| Space group                       | P -1                                                |                  |
| Unit cell dimensions              | a = 8.525(2) Å                                      | α = 65.054(12)°. |
|                                   | b = 11.534(2) Å                                     | β = 86.170(15)°. |
|                                   | c = 12.736(3) Å                                     | γ = 75.424(15)°. |
| Volume                            | 1097.9(4) Å <sup>3</sup>                            |                  |
| Z                                 | 2                                                   |                  |
| Density (calculated)              | 1.124 Mg/m <sup>3</sup>                             |                  |
| Absorption coefficient            | 0.106 mm <sup>-1</sup>                              |                  |
| F(000)                            | 404                                                 |                  |
| Crystal size                      | 0.35 x 0.20 x 0.15 mm <sup>3</sup>                  |                  |
| Theta range for data collection   | 2.01 to 28.85°.                                     |                  |
| Index ranges                      | -10 ≤ h ≤ 11, -15 ≤ k ≤ 15, -17 ≤ l ≤ 17            |                  |
| Reflections collected             | 17542                                               |                  |
| Independent reflections           | 5679 [R(int) = 0.0571]                              |                  |
| Completeness to theta = 28.85°    | 98.5 %                                              |                  |
| Absorption correction             | Semi-empirical from equivalents                     |                  |
| Max. and min. transmission        | 0.984 and 0.975                                     |                  |
| Refinement method                 | Full-matrix least-squares on F <sup>2</sup>         |                  |
| Data / restraints / parameters    | 5679 / 0 / 243                                      |                  |
| Goodness-of-fit on F <sup>2</sup> | 1.012                                               |                  |
| Final R indices [I > 2σ(I)]       | R1 = 0.0538, wR2 = 0.1421                           |                  |
| R indices (all data)              | R1 = 0.0955, wR2 = 0.1634                           |                  |
| Largest diff. peak and hole       | 0.258 and -0.288 e.Å <sup>-3</sup>                  |                  |

Table 2. Atomic coordinates ( $\times 10^4$ ) and equivalent isotropic displacement parameters ( $\text{\AA}^2 \times 10^3$ ) for pei366\_0m.  $U(\text{eq})$  is defined as one third of the trace of the orthogonalized  $U^{ij}$  tensor.

|       | x        | y        | z        | $U(\text{eq})$ |
|-------|----------|----------|----------|----------------|
| Al(1) | 7505(1)  | 5891(1)  | 1900(1)  | 46(1)          |
| N(1)  | 8487(2)  | 6696(1)  | 542(1)   | 38(1)          |
| N(2)  | 9993(2)  | 4550(1)  | 2258(1)  | 40(1)          |
| N(3)  | 5312(2)  | 7454(2)  | 513(1)   | 44(1)          |
| O(1)  | 7404(2)  | 6647(1)  | 2823(1)  | 56(1)          |
| C(6)  | 10089(2) | 6314(2)  | 346(2)   | 40(1)          |
| C(9)  | 7814(2)  | 7856(2)  | -385(2)  | 42(1)          |
| C(5)  | 11066(2) | 5121(2)  | 1306(2)  | 46(1)          |
| C(14) | 6945(2)  | 7780(2)  | 2957(2)  | 44(1)          |
| C(7)  | 10425(2) | 7211(2)  | -712(2)  | 49(1)          |
| C(10) | 6113(2)  | 8500(2)  | -233(2)  | 47(1)          |
| C(15) | 7889(2)  | 8702(2)  | 2544(2)  | 51(1)          |
| C(8)  | 8969(2)  | 8190(2)  | -1175(2) | 50(1)          |
| C(13) | 6324(2)  | 4515(2)  | 2362(2)  | 54(1)          |
| C(19) | 5558(2)  | 7991(2)  | 3566(2)  | 55(1)          |
| C(1)  | 10876(2) | 3819(2)  | 3444(2)  | 52(1)          |
| C(11) | 4899(2)  | 6815(2)  | -178(2)  | 55(1)          |
| C(16) | 7401(3)  | 9831(2)  | 2747(2)  | 66(1)          |
| C(12) | 3813(2)  | 8025(2)  | 949(2)   | 61(1)          |
| C(4)  | 11331(3) | 4776(2)  | 3809(2)  | 66(1)          |
| C(2)  | 12388(3) | 2781(2)  | 3421(2)  | 72(1)          |
| C(18) | 5121(3)  | 9154(3)  | 3724(2)  | 73(1)          |
| C(21) | 9401(3)  | 8500(3)  | 1901(2)  | 71(1)          |
| C(17) | 6038(4)  | 10063(3) | 3323(2)  | 77(1)          |
| C(3)  | 9687(3)  | 3152(3)  | 4295(2)  | 78(1)          |
| C(20) | 4589(3)  | 6978(3)  | 4050(2)  | 82(1)          |

Table 3. Bond lengths [ $\text{\AA}$ ] and angles [ $^\circ$ ] for pei366\_0m.

---

|                  |            |
|------------------|------------|
| Al(1)-O(1)       | 1.7211(14) |
| Al(1)-N(1)       | 1.8438(15) |
| Al(1)-C(13)      | 1.953(2)   |
| Al(1)-N(2)       | 2.2321(16) |
| Al(1)-N(3)       | 2.4337(17) |
| N(1)-C(6)        | 1.366(2)   |
| N(1)-C(9)        | 1.373(2)   |
| N(2)-C(5)        | 1.490(2)   |
| N(2)-C(1)        | 1.522(2)   |
| N(3)-C(11)       | 1.470(2)   |
| N(3)-C(12)       | 1.471(2)   |
| N(3)-C(10)       | 1.479(2)   |
| O(1)-C(14)       | 1.347(2)   |
| C(6)-C(7)        | 1.375(3)   |
| C(6)-C(5)        | 1.491(3)   |
| C(9)-C(8)        | 1.364(3)   |
| C(9)-C(10)       | 1.495(2)   |
| C(14)-C(19)      | 1.397(3)   |
| C(14)-C(15)      | 1.399(3)   |
| C(7)-C(8)        | 1.412(3)   |
| C(15)-C(16)      | 1.390(3)   |
| C(15)-C(21)      | 1.501(3)   |
| C(19)-C(18)      | 1.395(3)   |
| C(19)-C(20)      | 1.496(3)   |
| C(1)-C(4)        | 1.504(3)   |
| C(1)-C(3)        | 1.529(3)   |
| C(1)-C(2)        | 1.530(3)   |
| C(16)-C(17)      | 1.362(4)   |
| C(18)-C(17)      | 1.371(4)   |
| O(1)-Al(1)-N(1)  | 112.84(7)  |
| O(1)-Al(1)-C(13) | 115.46(8)  |
| N(1)-Al(1)-C(13) | 131.09(8)  |
| O(1)-Al(1)-N(2)  | 104.03(7)  |

|                   |            |
|-------------------|------------|
| N(1)-Al(1)-N(2)   | 78.67(6)   |
| C(13)-Al(1)-N(2)  | 96.65(8)   |
| O(1)-Al(1)-N(3)   | 99.42(7)   |
| N(1)-Al(1)-N(3)   | 74.26(6)   |
| C(13)-Al(1)-N(3)  | 90.64(7)   |
| N(2)-Al(1)-N(3)   | 149.42(6)  |
| C(6)-N(1)-C(9)    | 107.85(14) |
| C(6)-N(1)-Al(1)   | 124.98(12) |
| C(9)-N(1)-Al(1)   | 126.75(12) |
| C(5)-N(2)-C(1)    | 112.97(14) |
| C(5)-N(2)-Al(1)   | 110.01(10) |
| C(1)-N(2)-Al(1)   | 124.73(11) |
| C(11)-N(3)-C(12)  | 108.86(15) |
| C(11)-N(3)-C(10)  | 108.70(15) |
| C(12)-N(3)-C(10)  | 110.31(15) |
| C(11)-N(3)-Al(1)  | 107.98(11) |
| C(12)-N(3)-Al(1)  | 118.71(12) |
| C(10)-N(3)-Al(1)  | 101.80(10) |
| C(14)-O(1)-Al(1)  | 146.78(13) |
| N(1)-C(6)-C(7)    | 108.92(16) |
| N(1)-C(6)-C(5)    | 115.88(15) |
| C(7)-C(6)-C(5)    | 135.09(16) |
| C(8)-C(9)-N(1)    | 109.20(16) |
| C(8)-C(9)-C(10)   | 135.99(17) |
| N(1)-C(9)-C(10)   | 114.38(16) |
| N(2)-C(5)-C(6)    | 109.87(14) |
| O(1)-C(14)-C(19)  | 119.01(19) |
| O(1)-C(14)-C(15)  | 120.43(17) |
| C(19)-C(14)-C(15) | 120.48(19) |
| C(6)-C(7)-C(8)    | 106.95(16) |
| N(3)-C(10)-C(9)   | 108.16(14) |
| C(16)-C(15)-C(14) | 118.2(2)   |
| C(16)-C(15)-C(21) | 119.7(2)   |
| C(14)-C(15)-C(21) | 122.02(18) |
| C(9)-C(8)-C(7)    | 107.07(16) |
| C(18)-C(19)-C(14) | 118.4(2)   |

|                   |            |
|-------------------|------------|
| C(18)-C(19)-C(20) | 121.2(2)   |
| C(14)-C(19)-C(20) | 120.4(2)   |
| C(4)-C(1)-N(2)    | 110.24(17) |
| C(4)-C(1)-C(3)    | 108.88(19) |
| N(2)-C(1)-C(3)    | 106.73(16) |
| C(4)-C(1)-C(2)    | 110.37(18) |
| N(2)-C(1)-C(2)    | 110.44(16) |
| C(3)-C(1)-C(2)    | 110.10(19) |
| C(17)-C(16)-C(15) | 122.1(2)   |
| C(17)-C(18)-C(19) | 121.5(2)   |
| C(16)-C(17)-C(18) | 119.3(2)   |

---

Symmetry transformations used to generate equivalent atoms:

Table 4. Anisotropic displacement parameters ( $\text{\AA}^2 \times 10^3$ ) for pei366\_0m. The anisotropic displacement factor exponent takes the form:  $-2\pi^2 [ h^2 a^{*2} U^{11} + \dots + 2 h k a^* b^* U^{12} ]$

|       | U <sup>11</sup> | U <sup>22</sup> | U <sup>33</sup> | U <sup>23</sup> | U <sup>13</sup> | U <sup>12</sup> |
|-------|-----------------|-----------------|-----------------|-----------------|-----------------|-----------------|
| Al(1) | 45(1)           | 54(1)           | 51(1)           | -31(1)          | 17(1)           | -22(1)          |
| N(1)  | 29(1)           | 43(1)           | 43(1)           | -21(1)          | 3(1)            | -8(1)           |
| N(2)  | 35(1)           | 48(1)           | 41(1)           | -22(1)          | 2(1)            | -9(1)           |
| N(3)  | 33(1)           | 49(1)           | 54(1)           | -26(1)          | 3(1)            | -9(1)           |
| O(1)  | 63(1)           | 60(1)           | 60(1)           | -38(1)          | 18(1)           | -23(1)          |
| C(6)  | 31(1)           | 52(1)           | 44(1)           | -27(1)          | 6(1)            | -14(1)          |
| C(9)  | 40(1)           | 44(1)           | 46(1)           | -20(1)          | 0(1)            | -13(1)          |
| C(5)  | 30(1)           | 65(1)           | 45(1)           | -27(1)          | 4(1)            | -8(1)           |
| C(14) | 47(1)           | 52(1)           | 38(1)           | -25(1)          | 1(1)            | -8(1)           |
| C(7)  | 39(1)           | 64(1)           | 51(1)           | -27(1)          | 12(1)           | -22(1)          |
| C(10) | 42(1)           | 43(1)           | 53(1)           | -18(1)          | -3(1)           | -6(1)           |
| C(15) | 52(1)           | 53(1)           | 51(1)           | -26(1)          | -5(1)           | -9(1)           |
| C(8)  | 54(1)           | 49(1)           | 47(1)           | -15(1)          | 3(1)            | -23(1)          |
| C(13) | 46(1)           | 55(1)           | 62(1)           | -25(1)          | 8(1)            | -18(1)          |
| C(19) | 49(1)           | 71(1)           | 41(1)           | -26(1)          | 3(1)            | -5(1)           |
| C(1)  | 50(1)           | 60(1)           | 41(1)           | -20(1)          | -5(1)           | -8(1)           |
| C(11) | 42(1)           | 62(1)           | 68(1)           | -33(1)          | -4(1)           | -14(1)          |
| C(16) | 84(2)           | 49(1)           | 63(1)           | -26(1)          | -14(1)          | -8(1)           |
| C(12) | 42(1)           | 64(1)           | 74(1)           | -34(1)          | 10(1)           | -4(1)           |
| C(4)  | 61(1)           | 90(2)           | 57(1)           | -43(1)          | -6(1)           | -12(1)          |
| C(2)  | 64(1)           | 72(2)           | 68(1)           | -30(1)          | -22(1)          | 12(1)           |
| C(18) | 64(2)           | 88(2)           | 54(1)           | -37(1)          | 0(1)            | 18(1)           |
| C(21) | 63(1)           | 80(2)           | 86(2)           | -41(1)          | 19(1)           | -35(1)          |
| C(17) | 98(2)           | 57(2)           | 70(2)           | -37(1)          | -13(1)          | 12(1)           |
| C(3)  | 79(2)           | 92(2)           | 49(1)           | -9(1)           | -1(1)           | -32(1)          |
| C(20) | 67(2)           | 115(2)          | 64(1)           | -38(2)          | 24(1)           | -29(2)          |

Table 5. Hydrogen coordinates ( $\times 10^4$ ) and isotropic displacement parameters ( $\text{\AA}^2 \times 10^{-3}$ ) for pei366\_0m.

|        | x     | y     | z     | U(eq) |
|--------|-------|-------|-------|-------|
| H(2)   | 9774  | 3842  | 2096  | 49    |
| H(5A)  | 11603 | 4457  | 1011  | 56    |
| H(5B)  | 11917 | 5362  | 1606  | 56    |
| H(7)   | 11443 | 7178  | -1066 | 59    |
| H(10A) | 6117  | 9105  | 133   | 56    |
| H(10B) | 5520  | 9018  | -995  | 56    |
| H(8)   | 8821  | 8939  | -1899 | 60    |
| H(13A) | 5186  | 4879  | 2467  | 80    |
| H(13B) | 6809  | 3785  | 3092  | 80    |
| H(13C) | 6384  | 4191  | 1758  | 80    |
| H(11A) | 4185  | 7477  | -844  | 82    |
| H(11B) | 4341  | 6134  | 302   | 82    |
| H(11C) | 5893  | 6409  | -454  | 82    |
| H(16)  | 8038  | 10460 | 2476  | 79    |
| H(12A) | 3050  | 8637  | 295   | 91    |
| H(12B) | 4067  | 8501  | 1370  | 91    |
| H(12C) | 3322  | 7317  | 1471  | 91    |
| H(4A)  | 10363 | 5470  | 3766  | 98    |
| H(4B)  | 12139 | 5173  | 3293  | 98    |
| H(4C)  | 11787 | 4309  | 4608  | 98    |
| H(2A)  | 12863 | 2242  | 4210  | 108   |
| H(2B)  | 13183 | 3222  | 2927  | 108   |
| H(2C)  | 12088 | 2215  | 3113  | 108   |
| H(18)  | 4165  | 9321  | 4120  | 88    |
| H(21A) | 9115  | 8515  | 1162  | 107   |
| H(21B) | 10134 | 7646  | 2369  | 107   |
| H(21C) | 9941  | 9207  | 1754  | 107   |
| H(17)  | 5727  | 10846 | 3445  | 92    |
| H(3A)  | 8707  | 3821  | 4283  | 118   |
| H(3B)  | 10196 | 2690  | 5078  | 118   |

|        |      |      |      |     |
|--------|------|------|------|-----|
| H(3C)  | 9394 | 2516 | 4069 | 118 |
| H(20A) | 5167 | 6233 | 4739 | 123 |
| H(20B) | 4437 | 6668 | 3466 | 123 |
| H(20C) | 3529 | 7371 | 4263 | 123 |

---



Table 1. Crystal data and structure refinement for compound 12—ccdc-936574.

|                                   |                                                     |                 |
|-----------------------------------|-----------------------------------------------------|-----------------|
| Identification code               | compound 12—ccdc-936574                             |                 |
| Empirical formula                 | C <sub>24</sub> H <sub>38</sub> Al N <sub>3</sub> O |                 |
| Formula weight                    | 411.55                                              |                 |
| Temperature                       | 150(2) K                                            |                 |
| Wavelength                        | 0.71073 Å                                           |                 |
| Crystal system                    | Monoclinic                                          |                 |
| Space group                       | P 2 <sub>1</sub> /n                                 |                 |
| Unit cell dimensions              | a = 9.340(4) Å                                      | α = 90°.        |
|                                   | b = 21.360(8) Å                                     | β = 107.88(2)°. |
|                                   | c = 12.639(5) Å                                     | γ = 90°.        |
| Volume                            | 2399.9(16) Å <sup>3</sup>                           |                 |
| Z                                 | 4                                                   |                 |
| Density (calculated)              | 1.139 Mg/m <sup>3</sup>                             |                 |
| Absorption coefficient            | 0.103 mm <sup>-1</sup>                              |                 |
| F(000)                            | 896                                                 |                 |
| Crystal size                      | 0.30 x 0.20 x 0.18 mm <sup>3</sup>                  |                 |
| Theta range for data collection   | 1.91 to 28.89°.                                     |                 |
| Index ranges                      | -12 ≤ h ≤ 12, -28 ≤ k ≤ 28, -17 ≤ l ≤ 17            |                 |
| Reflections collected             | 40805                                               |                 |
| Independent reflections           | 6223 [R(int) = 0.1532]                              |                 |
| Completeness to theta = 28.89°    | 98.6 %                                              |                 |
| Absorption correction             | Semi-empirical from equivalents                     |                 |
| Max. and min. transmission        | 0.982 and 0.976                                     |                 |
| Refinement method                 | Full-matrix least-squares on F <sup>2</sup>         |                 |
| Data / restraints / parameters    | 6223 / 0 / 270                                      |                 |
| Goodness-of-fit on F <sup>2</sup> | 0.975                                               |                 |
| Final R indices [I > 2σ(I)]       | R1 = 0.0723, wR2 = 0.1836                           |                 |
| R indices (all data)              | R1 = 0.1432, wR2 = 0.2293                           |                 |
| Largest diff. peak and hole       | 0.560 and -0.426 e.Å <sup>-3</sup>                  |                 |

Table 2. Atomic coordinates ( $\times 10^4$ ) and equivalent isotropic displacement parameters ( $\text{\AA}^2 \times 10^3$ ) for pei358\_0m.  $U(\text{eq})$  is defined as one third of the trace of the orthogonalized  $U^{ij}$  tensor.

|       | x       | y       | z       | $U(\text{eq})$ |
|-------|---------|---------|---------|----------------|
| Al(1) | 2271(1) | 1304(1) | 3733(1) | 45(1)          |
| N(1)  | 4019(2) | 1059(1) | 3347(2) | 44(1)          |
| N(2)  | 1769(3) | 252(1)  | 3323(2) | 53(1)          |
| N(3)  | 3560(2) | 3157(1) | 4412(2) | 47(1)          |
| O(1)  | 2911(2) | 2180(1) | 3857(2) | 55(1)          |
| C(16) | 3901(3) | 2589(1) | 4140(2) | 41(1)          |
| C(9)  | 5523(3) | 2446(1) | 4164(2) | 39(1)          |
| C(8)  | 5406(3) | 2058(1) | 3084(2) | 43(1)          |
| C(10) | 6392(3) | 3061(1) | 4184(2) | 40(1)          |
| C(11) | 7142(3) | 3357(1) | 5175(2) | 48(1)          |
| C(17) | 2048(3) | 3380(1) | 4410(2) | 51(1)          |
| C(7)  | 5189(3) | 1359(1) | 3101(2) | 43(1)          |
| C(15) | 6405(3) | 3358(1) | 3207(2) | 48(1)          |
| C(5)  | 5554(3) | 329(1)  | 2979(2) | 55(1)          |
| C(13) | 7827(3) | 4218(1) | 4216(3) | 54(1)          |
| C(3)  | 3297(3) | -12(1)  | 3650(3) | 56(1)          |
| C(12) | 7858(3) | 3932(1) | 5195(2) | 54(1)          |
| C(6)  | 6136(3) | 928(1)  | 2872(2) | 52(1)          |
| C(14) | 7101(3) | 3931(1) | 3225(2) | 53(1)          |
| C(21) | 6227(3) | 2044(1) | 5212(2) | 49(1)          |
| C(4)  | 4296(3) | 423(1)  | 3285(2) | 49(1)          |
| C(22) | 7852(4) | 1853(2) | 5376(3) | 64(1)          |
| C(23) | 301(3)  | 1545(2) | 2679(3) | 63(1)          |
| C(24) | 2460(4) | 1205(2) | 5326(2) | 67(1)          |
| C(18) | 1455(4) | 2985(2) | 5189(3) | 70(1)          |
| C(2)  | 1046(4) | 142(2)  | 2130(3) | 67(1)          |
| C(20) | 2268(4) | 4056(1) | 4835(3) | 69(1)          |
| C(19) | 990(4)  | 3369(2) | 3228(3) | 70(1)          |
| C(1)  | 841(4)  | -50(2)  | 3929(3) | 74(1)          |

Table 3. Bond lengths [Å] and angles [°] for pei358\_0m.

---

|             |          |
|-------------|----------|
| Al(1)-N(1)  | 1.915(2) |
| Al(1)-O(1)  | 1.956(2) |
| Al(1)-C(24) | 1.977(3) |
| Al(1)-C(23) | 1.980(3) |
| Al(1)-N(2)  | 2.321(3) |
| N(1)-C(7)   | 1.383(3) |
| N(1)-C(4)   | 1.389(3) |
| N(2)-C(2)   | 1.469(4) |
| N(2)-C(1)   | 1.470(4) |
| N(2)-C(3)   | 1.471(4) |
| N(3)-C(16)  | 1.326(3) |
| N(3)-C(17)  | 1.491(3) |
| N(3)-H(3)   | 0.9999   |
| O(1)-C(16)  | 1.243(3) |
| C(16)-C(9)  | 1.538(3) |
| C(9)-C(10)  | 1.541(3) |
| C(9)-C(21)  | 1.545(3) |
| C(9)-C(8)   | 1.571(3) |
| C(8)-C(7)   | 1.507(3) |
| C(8)-H(8A)  | 0.9900   |
| C(8)-H(8B)  | 0.9900   |
| C(10)-C(11) | 1.385(4) |
| C(10)-C(15) | 1.392(3) |
| C(11)-C(12) | 1.396(4) |
| C(11)-H(11) | 0.9500   |
| C(17)-C(19) | 1.517(4) |
| C(17)-C(18) | 1.524(4) |
| C(17)-C(20) | 1.531(4) |
| C(7)-C(6)   | 1.368(4) |
| C(15)-C(14) | 1.383(4) |
| C(15)-H(15) | 0.9500   |
| C(5)-C(4)   | 1.360(4) |
| C(5)-C(6)   | 1.413(4) |
| C(5)-H(5)   | 0.9500   |

|              |          |
|--------------|----------|
| C(13)-C(12)  | 1.371(4) |
| C(13)-C(14)  | 1.372(4) |
| C(13)-H(13)  | 0.9500   |
| C(3)-C(4)    | 1.487(4) |
| C(3)-H(3A)   | 0.9900   |
| C(3)-H(3B)   | 0.9900   |
| C(12)-H(12)  | 0.9500   |
| C(6)-H(6)    | 0.9500   |
| C(14)-H(14)  | 0.9500   |
| C(21)-C(22)  | 1.523(4) |
| C(21)-H(21A) | 0.9900   |
| C(21)-H(21B) | 0.9900   |
| C(22)-H(22A) | 0.9800   |
| C(22)-H(22B) | 0.9800   |
| C(22)-H(22C) | 0.9800   |
| C(23)-H(23A) | 0.9800   |
| C(23)-H(23B) | 0.9800   |
| C(23)-H(23C) | 0.9800   |
| C(24)-H(24A) | 0.9800   |
| C(24)-H(24B) | 0.9800   |
| C(24)-H(24C) | 0.9800   |
| C(18)-H(18A) | 0.9800   |
| C(18)-H(18B) | 0.9800   |
| C(18)-H(18C) | 0.9800   |
| C(2)-H(2A)   | 0.9800   |
| C(2)-H(2B)   | 0.9800   |
| C(2)-H(2C)   | 0.9800   |
| C(20)-H(20A) | 0.9800   |
| C(20)-H(20B) | 0.9800   |
| C(20)-H(20C) | 0.9800   |
| C(19)-H(19A) | 0.9800   |
| C(19)-H(19B) | 0.9800   |
| C(19)-H(19C) | 0.9800   |
| C(1)-H(1A)   | 0.9800   |
| C(1)-H(1B)   | 0.9800   |
| C(1)-H(1C)   | 0.9800   |

|                   |            |
|-------------------|------------|
| N(1)-Al(1)-O(1)   | 91.03(9)   |
| N(1)-Al(1)-C(24)  | 114.42(13) |
| O(1)-Al(1)-C(24)  | 95.22(12)  |
| N(1)-Al(1)-C(23)  | 126.04(12) |
| O(1)-Al(1)-C(23)  | 90.19(11)  |
| C(24)-Al(1)-C(23) | 119.16(15) |
| N(1)-Al(1)-N(2)   | 78.94(9)   |
| O(1)-Al(1)-N(2)   | 168.42(9)  |
| C(24)-Al(1)-N(2)  | 94.21(11)  |
| C(23)-Al(1)-N(2)  | 91.08(12)  |
| C(7)-N(1)-C(4)    | 105.5(2)   |
| C(7)-N(1)-Al(1)   | 136.47(18) |
| C(4)-N(1)-Al(1)   | 117.98(18) |
| C(2)-N(2)-C(1)    | 107.8(3)   |
| C(2)-N(2)-C(3)    | 109.1(2)   |
| C(1)-N(2)-C(3)    | 111.2(2)   |
| C(2)-N(2)-Al(1)   | 112.50(18) |
| C(1)-N(2)-Al(1)   | 114.78(19) |
| C(3)-N(2)-Al(1)   | 101.35(16) |
| C(16)-N(3)-C(17)  | 126.5(2)   |
| C(16)-N(3)-H(3)   | 106.7      |
| C(17)-N(3)-H(3)   | 126.6      |
| C(16)-O(1)-Al(1)  | 151.45(19) |
| O(1)-C(16)-N(3)   | 120.2(2)   |
| O(1)-C(16)-C(9)   | 120.5(2)   |
| N(3)-C(16)-C(9)   | 119.4(2)   |
| C(16)-C(9)-C(10)  | 110.0(2)   |
| C(16)-C(9)-C(21)  | 106.5(2)   |
| C(10)-C(9)-C(21)  | 112.1(2)   |
| C(16)-C(9)-C(8)   | 106.4(2)   |
| C(10)-C(9)-C(8)   | 111.08(19) |
| C(21)-C(9)-C(8)   | 110.5(2)   |
| C(7)-C(8)-C(9)    | 118.9(2)   |
| C(7)-C(8)-H(8A)   | 107.6      |
| C(9)-C(8)-H(8A)   | 107.6      |

|                   |          |
|-------------------|----------|
| C(7)-C(8)-H(8B)   | 107.6    |
| C(9)-C(8)-H(8B)   | 107.6    |
| H(8A)-C(8)-H(8B)  | 107.0    |
| C(11)-C(10)-C(15) | 117.1(2) |
| C(11)-C(10)-C(9)  | 121.4(2) |
| C(15)-C(10)-C(9)  | 121.4(2) |
| C(10)-C(11)-C(12) | 121.6(3) |
| C(10)-C(11)-H(11) | 119.2    |
| C(12)-C(11)-H(11) | 119.2    |
| N(3)-C(17)-C(19)  | 109.1(2) |
| N(3)-C(17)-C(18)  | 110.8(2) |
| C(19)-C(17)-C(18) | 111.8(3) |
| N(3)-C(17)-C(20)  | 106.0(2) |
| C(19)-C(17)-C(20) | 109.7(3) |
| C(18)-C(17)-C(20) | 109.4(3) |
| C(6)-C(7)-N(1)    | 110.0(2) |
| C(6)-C(7)-C(8)    | 124.4(2) |
| N(1)-C(7)-C(8)    | 125.6(2) |
| C(14)-C(15)-C(10) | 121.4(3) |
| C(14)-C(15)-H(15) | 119.3    |
| C(10)-C(15)-H(15) | 119.3    |
| C(4)-C(5)-C(6)    | 106.5(2) |
| C(4)-C(5)-H(5)    | 126.7    |
| C(6)-C(5)-H(5)    | 126.7    |
| C(12)-C(13)-C(14) | 119.5(3) |
| C(12)-C(13)-H(13) | 120.3    |
| C(14)-C(13)-H(13) | 120.3    |
| N(2)-C(3)-C(4)    | 108.6(2) |
| N(2)-C(3)-H(3A)   | 110.0    |
| C(4)-C(3)-H(3A)   | 110.0    |
| N(2)-C(3)-H(3B)   | 110.0    |
| C(4)-C(3)-H(3B)   | 110.0    |
| H(3A)-C(3)-H(3B)  | 108.3    |
| C(13)-C(12)-C(11) | 119.9(3) |
| C(13)-C(12)-H(12) | 120.0    |
| C(11)-C(12)-H(12) | 120.0    |

|                     |          |
|---------------------|----------|
| C(7)-C(6)-C(5)      | 107.3(2) |
| C(7)-C(6)-H(6)      | 126.4    |
| C(5)-C(6)-H(6)      | 126.4    |
| C(13)-C(14)-C(15)   | 120.6(3) |
| C(13)-C(14)-H(14)   | 119.7    |
| C(15)-C(14)-H(14)   | 119.7    |
| C(22)-C(21)-C(9)    | 114.1(2) |
| C(22)-C(21)-H(21A)  | 108.7    |
| C(9)-C(21)-H(21A)   | 108.7    |
| C(22)-C(21)-H(21B)  | 108.7    |
| C(9)-C(21)-H(21B)   | 108.7    |
| H(21A)-C(21)-H(21B) | 107.6    |
| C(5)-C(4)-N(1)      | 110.6(2) |
| C(5)-C(4)-C(3)      | 132.4(3) |
| N(1)-C(4)-C(3)      | 116.7(2) |
| C(21)-C(22)-H(22A)  | 109.5    |
| C(21)-C(22)-H(22B)  | 109.5    |
| H(22A)-C(22)-H(22B) | 109.5    |
| C(21)-C(22)-H(22C)  | 109.5    |
| H(22A)-C(22)-H(22C) | 109.5    |
| H(22B)-C(22)-H(22C) | 109.5    |
| Al(1)-C(23)-H(23A)  | 109.5    |
| Al(1)-C(23)-H(23B)  | 109.5    |
| H(23A)-C(23)-H(23B) | 109.5    |
| Al(1)-C(23)-H(23C)  | 109.5    |
| H(23A)-C(23)-H(23C) | 109.5    |
| H(23B)-C(23)-H(23C) | 109.5    |
| Al(1)-C(24)-H(24A)  | 109.5    |
| Al(1)-C(24)-H(24B)  | 109.5    |
| H(24A)-C(24)-H(24B) | 109.5    |
| Al(1)-C(24)-H(24C)  | 109.5    |
| H(24A)-C(24)-H(24C) | 109.5    |
| H(24B)-C(24)-H(24C) | 109.5    |
| C(17)-C(18)-H(18A)  | 109.5    |
| C(17)-C(18)-H(18B)  | 109.5    |
| H(18A)-C(18)-H(18B) | 109.5    |

|                     |       |
|---------------------|-------|
| C(17)-C(18)-H(18C)  | 109.5 |
| H(18A)-C(18)-H(18C) | 109.5 |
| H(18B)-C(18)-H(18C) | 109.5 |
| N(2)-C(2)-H(2A)     | 109.5 |
| N(2)-C(2)-H(2B)     | 109.5 |
| H(2A)-C(2)-H(2B)    | 109.5 |
| N(2)-C(2)-H(2C)     | 109.5 |
| H(2A)-C(2)-H(2C)    | 109.5 |
| H(2B)-C(2)-H(2C)    | 109.5 |
| C(17)-C(20)-H(20A)  | 109.5 |
| C(17)-C(20)-H(20B)  | 109.5 |
| H(20A)-C(20)-H(20B) | 109.5 |
| C(17)-C(20)-H(20C)  | 109.5 |
| H(20A)-C(20)-H(20C) | 109.5 |
| H(20B)-C(20)-H(20C) | 109.5 |
| C(17)-C(19)-H(19A)  | 109.5 |
| C(17)-C(19)-H(19B)  | 109.5 |
| H(19A)-C(19)-H(19B) | 109.5 |
| C(17)-C(19)-H(19C)  | 109.5 |
| H(19A)-C(19)-H(19C) | 109.5 |
| H(19B)-C(19)-H(19C) | 109.5 |
| N(2)-C(1)-H(1A)     | 109.5 |
| N(2)-C(1)-H(1B)     | 109.5 |
| H(1A)-C(1)-H(1B)    | 109.5 |
| N(2)-C(1)-H(1C)     | 109.5 |
| H(1A)-C(1)-H(1C)    | 109.5 |
| H(1B)-C(1)-H(1C)    | 109.5 |

---

Symmetry transformations used to generate equivalent atoms:



Table 4. Anisotropic displacement parameters ( $\text{\AA}^2 \times 10^3$ ) for pei358\_0m. The anisotropic displacement factor exponent takes the form:  $-2\pi^2 [ h^2 a^{*2} U^{11} + \dots + 2 h k a^* b^* U^{12} ]$

|       | $U^{11}$ | $U^{22}$ | $U^{33}$ | $U^{23}$ | $U^{13}$ | $U^{12}$ |
|-------|----------|----------|----------|----------|----------|----------|
| Al(1) | 42(1)    | 47(1)    | 49(1)    | 0(1)     | 19(1)    | -2(1)    |
| N(1)  | 46(1)    | 38(1)    | 50(1)    | -3(1)    | 18(1)    | -2(1)    |
| N(2)  | 57(2)    | 49(1)    | 56(1)    | 1(1)     | 24(1)    | -9(1)    |
| N(3)  | 38(1)    | 46(1)    | 59(1)    | -6(1)    | 19(1)    | 1(1)     |
| O(1)  | 41(1)    | 45(1)    | 80(1)    | -7(1)    | 20(1)    | -3(1)    |
| C(16) | 41(2)    | 40(1)    | 45(1)    | 1(1)     | 16(1)    | -1(1)    |
| C(9)  | 37(1)    | 39(1)    | 42(1)    | 2(1)     | 13(1)    | 0(1)     |
| C(8)  | 43(2)    | 43(1)    | 47(1)    | -2(1)    | 18(1)    | -2(1)    |
| C(10) | 33(1)    | 40(1)    | 48(1)    | 0(1)     | 13(1)    | 0(1)     |
| C(11) | 46(2)    | 48(2)    | 49(1)    | -4(1)    | 16(1)    | 0(1)     |
| C(17) | 44(2)    | 48(2)    | 65(2)    | -6(1)    | 22(1)    | 4(1)     |
| C(7)  | 42(2)    | 44(1)    | 44(1)    | -4(1)    | 14(1)    | -1(1)    |
| C(15) | 48(2)    | 48(2)    | 46(1)    | -1(1)    | 14(1)    | -2(1)    |
| C(5)  | 62(2)    | 38(1)    | 68(2)    | -3(1)    | 27(2)    | 8(1)     |
| C(13) | 44(2)    | 41(1)    | 78(2)    | -7(1)    | 22(2)    | -3(1)    |
| C(3)  | 61(2)    | 42(2)    | 67(2)    | 1(1)     | 25(2)    | 0(1)     |
| C(12) | 49(2)    | 52(2)    | 64(2)    | -15(1)   | 19(1)    | -4(1)    |
| C(6)  | 48(2)    | 50(2)    | 63(2)    | -4(1)    | 27(1)    | 0(1)     |
| C(14) | 53(2)    | 47(2)    | 62(2)    | 10(1)    | 22(1)    | 2(1)     |
| C(21) | 53(2)    | 48(2)    | 42(1)    | 3(1)     | 10(1)    | -2(1)    |
| C(4)  | 58(2)    | 38(1)    | 55(2)    | -2(1)    | 20(1)    | -2(1)    |
| C(22) | 54(2)    | 58(2)    | 68(2)    | 4(2)     | 0(2)     | 10(2)    |
| C(23) | 46(2)    | 56(2)    | 81(2)    | -1(2)    | 13(2)    | -6(1)    |
| C(24) | 86(3)    | 62(2)    | 58(2)    | -1(2)    | 29(2)    | -1(2)    |
| C(18) | 64(2)    | 67(2)    | 94(2)    | -2(2)    | 50(2)    | 3(2)     |
| C(2)  | 73(2)    | 62(2)    | 65(2)    | -7(2)    | 20(2)    | -13(2)   |
| C(20) | 66(2)    | 49(2)    | 97(2)    | -11(2)   | 33(2)    | 6(2)     |
| C(19) | 58(2)    | 68(2)    | 75(2)    | -6(2)    | 8(2)     | 16(2)    |
| C(1)  | 73(2)    | 68(2)    | 92(2)    | 7(2)     | 42(2)    | -14(2)   |

Table 5. Hydrogen coordinates ( $\times 10^4$ ) and isotropic displacement parameters ( $\text{\AA}^2 \times 10^{-3}$ ) for pei358\_0m.

|        | x    | y    | z    | U(eq) |
|--------|------|------|------|-------|
| H(3)   | 4529 | 3393 | 4686 | 56    |
| H(8A)  | 4558 | 2232 | 2477 | 52    |
| H(8B)  | 6335 | 2136 | 2882 | 52    |
| H(11)  | 7169 | 3163 | 5858 | 57    |
| H(15)  | 5927 | 3162 | 2513 | 57    |
| H(5)   | 5961 | -63  | 2860 | 66    |
| H(13)  | 8304 | 4611 | 4225 | 65    |
| H(3A)  | 3285 | -427 | 3298 | 67    |
| H(3B)  | 3673 | -67  | 4467 | 67    |
| H(12)  | 8366 | 4125 | 5885 | 65    |
| H(6)   | 7020 | 1015 | 2677 | 62    |
| H(14)  | 7076 | 4128 | 2546 | 64    |
| H(21A) | 6182 | 2283 | 5873 | 59    |
| H(21B) | 5613 | 1661 | 5165 | 59    |
| H(22A) | 8464 | 2228 | 5400 | 97    |
| H(22B) | 7898 | 1585 | 4758 | 97    |
| H(22C) | 8239 | 1623 | 6077 | 97    |
| H(23A) | -431 | 1210 | 2640 | 94    |
| H(23B) | 408  | 1612 | 1940 | 94    |
| H(23C) | -51  | 1932 | 2934 | 94    |
| H(24A) | 2937 | 1579 | 5734 | 101   |
| H(24B) | 3078 | 837  | 5622 | 101   |
| H(24C) | 1459 | 1151 | 5410 | 101   |
| H(18A) | 2241 | 2940 | 5906 | 104   |
| H(18B) | 1167 | 2570 | 4860 | 104   |
| H(18C) | 575  | 3190 | 5302 | 104   |
| H(2A)  | 1022 | -309 | 1979 | 100   |
| H(2B)  | 1618 | 355  | 1703 | 100   |
| H(2C)  | 16   | 305  | 1912 | 100   |
| H(20A) | 2730 | 4302 | 4373 | 103   |

|        |      |      |      |     |
|--------|------|------|------|-----|
| H(20B) | 2925 | 4060 | 5607 | 103 |
| H(20C) | 1290 | 4237 | 4798 | 103 |
| H(19A) | 848  | 2936 | 2960 | 105 |
| H(19B) | 1421 | 3617 | 2749 | 105 |
| H(19C) | 16   | 3547 | 3213 | 105 |
| H(1A)  | 1359 | -27  | 4730 | 111 |
| H(1B)  | 677  | -490 | 3703 | 111 |
| H(1C)  | -130 | 165  | 3758 | 111 |

---



Table 1. Crystal data and structure refinement for compound 3.

|                                   |                                                                   |                  |
|-----------------------------------|-------------------------------------------------------------------|------------------|
| Identification code               | compound 3—ccdc-936565                                            |                  |
| Empirical formula                 | C <sub>12</sub> H <sub>22</sub> Al Cl <sub>2</sub> N <sub>3</sub> |                  |
| Formula weight                    | 306.21                                                            |                  |
| Temperature                       | 149(2) K                                                          |                  |
| Wavelength                        | 0.71073 Å                                                         |                  |
| Crystal system                    | Monoclinic                                                        |                  |
| Space group                       | P 2 <sub>1</sub> /c                                               |                  |
| Unit cell dimensions              | a = 12.5365(4) Å                                                  | α = 90°.         |
|                                   | b = 13.4673(4) Å                                                  | β = 112.575(2)°. |
|                                   | c = 10.0304(3) Å                                                  | γ = 90°.         |
| Volume                            | 1563.70(8) Å <sup>3</sup>                                         |                  |
| Z                                 | 4                                                                 |                  |
| Density (calculated)              | 1.301 Mg/m <sup>3</sup>                                           |                  |
| Absorption coefficient            | 0.459 mm <sup>-1</sup>                                            |                  |
| F(000)                            | 648                                                               |                  |
| Crystal size                      | ? x ? x ? mm <sup>3</sup>                                         |                  |
| Theta range for data collection   | 1.76 to 28.28°.                                                   |                  |
| Index ranges                      | -16 ≤ h ≤ 16, -17 ≤ k ≤ 17, -13 ≤ l ≤ 13                          |                  |
| Reflections collected             | 21774                                                             |                  |
| Independent reflections           | 3884 [R(int) = 0.0361]                                            |                  |
| Completeness to theta = 28.28°    | 99.9 %                                                            |                  |
| Absorption correction             | Semi-empirical from equivalents                                   |                  |
| Refinement method                 | Full-matrix least-squares on F <sup>2</sup>                       |                  |
| Data / restraints / parameters    | 3884 / 0 / 168                                                    |                  |
| Goodness-of-fit on F <sup>2</sup> | 1.052                                                             |                  |
| Final R indices [I > 2σ(I)]       | R <sub>1</sub> = 0.0330, wR <sub>2</sub> = 0.0862                 |                  |
| R indices (all data)              | R <sub>1</sub> = 0.0420, wR <sub>2</sub> = 0.0939                 |                  |
| Largest diff. peak and hole       | 0.484 and -0.291 e.Å <sup>-3</sup>                                |                  |

Table 2. Atomic coordinates ( $\times 10^4$ ) and equivalent isotropic displacement parameters ( $\text{\AA}^2 \times 10^3$ ) for pei1081\_0m.  $U(\text{eq})$  is defined as one third of the trace of the orthogonalized  $U^{ij}$  tensor.

|       | x       | y        | z        | $U(\text{eq})$ |
|-------|---------|----------|----------|----------------|
| Cl(1) | 566(1)  | 8960(1)  | 8039(1)  | 32(1)          |
| Cl(2) | 2014(1) | 11038(1) | 10264(1) | 34(1)          |
| Al(1) | 2173(1) | 9603(1)  | 9421(1)  | 22(1)          |
| N(1)  | 3426(1) | 8804(1)  | 9751(1)  | 25(1)          |
| N(2)  | 2296(1) | 8827(1)  | 11404(1) | 27(1)          |
| N(3)  | 2941(1) | 10266(1) | 7960(1)  | 24(1)          |
| C(1)  | 3033(2) | 11254(1) | 5888(2)  | 42(1)          |
| C(2)  | 1663(1) | 9826(1)  | 5438(2)  | 33(1)          |
| C(3)  | 1336(2) | 11377(1) | 6595(2)  | 40(1)          |
| C(4)  | 2246(1) | 10673(1) | 6462(2)  | 30(1)          |
| C(5)  | 3983(1) | 9679(1)  | 8022(2)  | 28(1)          |
| C(6)  | 4231(1) | 8887(1)  | 9152(2)  | 26(1)          |
| C(7)  | 5047(1) | 8158(1)  | 9719(2)  | 31(1)          |
| C(8)  | 4715(1) | 7602(1)  | 10712(2) | 32(1)          |
| C(9)  | 3712(1) | 8022(1)  | 10693(2) | 29(1)          |
| C(10) | 2820(1) | 7840(1)  | 11325(2) | 33(1)          |
| C(11) | 1187(2) | 8676(1)  | 11593(2) | 37(1)          |
| C(12) | 3100(2) | 9353(1)  | 12696(2) | 37(1)          |

Table 3. Bond lengths [ $\text{\AA}$ ] and angles [ $^\circ$ ] for pei1081\_0m.

---

|                   |            |
|-------------------|------------|
| Cl(1)-Al(1)       | 2.1418(6)  |
| Cl(2)-Al(1)       | 2.1485(5)  |
| Al(1)-N(1)        | 1.8266(13) |
| Al(1)-N(2)        | 2.2006(13) |
| Al(1)-N(3)        | 2.2249(12) |
| N(1)-C(6)         | 1.3623(18) |
| N(1)-C(9)         | 1.3680(19) |
| N(2)-C(12)        | 1.481(2)   |
| N(2)-C(11)        | 1.4867(19) |
| N(2)-C(10)        | 1.4977(19) |
| N(3)-C(5)         | 1.5073(19) |
| N(3)-C(4)         | 1.5206(19) |
| C(1)-C(4)         | 1.533(2)   |
| C(2)-C(4)         | 1.521(2)   |
| C(3)-C(4)         | 1.528(2)   |
| C(5)-C(6)         | 1.500(2)   |
| C(6)-C(7)         | 1.374(2)   |
| C(7)-C(8)         | 1.430(2)   |
| C(8)-C(9)         | 1.372(2)   |
| C(9)-C(10)        | 1.502(2)   |
|                   |            |
| N(1)-Al(1)-Cl(1)  | 114.15(5)  |
| N(1)-Al(1)-Cl(2)  | 131.42(5)  |
| Cl(1)-Al(1)-Cl(2) | 114.33(2)  |
| N(1)-Al(1)-N(2)   | 78.42(5)   |
| Cl(1)-Al(1)-N(2)  | 96.58(4)   |
| Cl(2)-Al(1)-N(2)  | 93.23(4)   |
| N(1)-Al(1)-N(3)   | 78.26(5)   |
| Cl(1)-Al(1)-N(3)  | 105.86(4)  |
| Cl(2)-Al(1)-N(3)  | 91.58(4)   |
| N(2)-Al(1)-N(3)   | 152.66(5)  |
| C(6)-N(1)-C(9)    | 108.99(12) |
| C(6)-N(1)-Al(1)   | 127.07(10) |
| C(9)-N(1)-Al(1)   | 123.93(10) |

|                  |            |
|------------------|------------|
| C(12)-N(2)-C(11) | 108.03(12) |
| C(12)-N(2)-C(10) | 107.80(13) |
| C(11)-N(2)-C(10) | 109.67(12) |
| C(12)-N(2)-Al(1) | 110.53(10) |
| C(11)-N(2)-Al(1) | 115.85(10) |
| C(10)-N(2)-Al(1) | 104.68(9)  |
| C(5)-N(3)-C(4)   | 112.86(11) |
| C(5)-N(3)-Al(1)  | 110.46(9)  |
| C(4)-N(3)-Al(1)  | 124.52(9)  |
| N(3)-C(4)-C(2)   | 109.95(12) |
| N(3)-C(4)-C(3)   | 107.52(12) |
| C(2)-C(4)-C(3)   | 110.07(14) |
| N(3)-C(4)-C(1)   | 110.34(13) |
| C(2)-C(4)-C(1)   | 109.93(13) |
| C(3)-C(4)-C(1)   | 108.99(14) |
| C(6)-C(5)-N(3)   | 109.23(11) |
| N(1)-C(6)-C(7)   | 108.63(13) |
| N(1)-C(6)-C(5)   | 114.66(12) |
| C(7)-C(6)-C(5)   | 136.60(13) |
| C(6)-C(7)-C(8)   | 106.99(13) |
| C(9)-C(8)-C(7)   | 106.55(14) |
| N(1)-C(9)-C(8)   | 108.83(13) |
| N(1)-C(9)-C(10)  | 112.15(12) |
| C(8)-C(9)-C(10)  | 138.90(15) |
| N(2)-C(10)-C(9)  | 106.92(12) |

---

Symmetry transformations used to generate equivalent atoms:



Table 4. Anisotropic displacement parameters ( $\text{\AA}^2 \times 10^3$ ) for pei1081\_0m. The anisotropic displacement factor exponent takes the form:  $-2\pi^2 [ h^2 a^{*2} U^{11} + \dots + 2 h k a^* b^* U^{12} ]$

|       | U <sup>11</sup> | U <sup>22</sup> | U <sup>33</sup> | U <sup>23</sup> | U <sup>13</sup> | U <sup>12</sup> |
|-------|-----------------|-----------------|-----------------|-----------------|-----------------|-----------------|
| Cl(1) | 24(1)           | 36(1)           | 31(1)           | 3(1)            | 7(1)            | -4(1)           |
| Cl(2) | 44(1)           | 26(1)           | 41(1)           | -4(1)           | 26(1)           | 0(1)            |
| Al(1) | 21(1)           | 24(1)           | 23(1)           | 0(1)            | 10(1)           | 2(1)            |
| N(1)  | 23(1)           | 31(1)           | 23(1)           | 1(1)            | 11(1)           | 4(1)            |
| N(2)  | 26(1)           | 32(1)           | 26(1)           | 4(1)            | 14(1)           | 3(1)            |
| N(3)  | 26(1)           | 26(1)           | 22(1)           | -2(1)           | 11(1)           | -4(1)           |
| C(1)  | 54(1)           | 41(1)           | 34(1)           | 4(1)            | 21(1)           | -15(1)          |
| C(2)  | 35(1)           | 38(1)           | 22(1)           | 1(1)            | 8(1)            | -6(1)           |
| C(3)  | 49(1)           | 34(1)           | 37(1)           | 10(1)           | 16(1)           | 8(1)            |
| C(4)  | 36(1)           | 29(1)           | 25(1)           | 3(1)            | 12(1)           | -5(1)           |
| C(5)  | 26(1)           | 39(1)           | 23(1)           | -5(1)           | 14(1)           | -4(1)           |
| C(6)  | 21(1)           | 33(1)           | 23(1)           | -10(1)          | 10(1)           | -3(1)           |
| C(7)  | 23(1)           | 39(1)           | 30(1)           | -13(1)          | 9(1)            | 3(1)            |
| C(8)  | 28(1)           | 33(1)           | 30(1)           | -3(1)           | 6(1)            | 8(1)            |
| C(9)  | 28(1)           | 30(1)           | 26(1)           | 1(1)            | 10(1)           | 6(1)            |
| C(10) | 35(1)           | 31(1)           | 33(1)           | 10(1)           | 16(1)           | 8(1)            |
| C(11) | 33(1)           | 45(1)           | 40(1)           | 10(1)           | 23(1)           | 3(1)            |
| C(12) | 38(1)           | 51(1)           | 24(1)           | -1(1)           | 14(1)           | 0(1)            |



Table 1. Crystal data and structure refinement for compound 4.

|                                   |                                                                   |                    |
|-----------------------------------|-------------------------------------------------------------------|--------------------|
| Identification code               | compound 4—ccdc-936566                                            |                    |
| Empirical formula                 | C <sub>14</sub> H <sub>26</sub> Al Cl <sub>2</sub> N <sub>3</sub> |                    |
| Formula weight                    | 334.26                                                            |                    |
| Temperature                       | 149(2) K                                                          |                    |
| Wavelength                        | 0.71073 Å                                                         |                    |
| Crystal system                    | Monoclinic                                                        |                    |
| Space group                       | C c                                                               |                    |
| Unit cell dimensions              | a = 13.7242(4) Å                                                  | α = 90°.           |
|                                   | b = 14.8920(4) Å                                                  | β = 100.6970(10)°. |
|                                   | c = 17.5053(5) Å                                                  | γ = 90°.           |
| Volume                            | 3515.57(17) Å <sup>3</sup>                                        |                    |
| Z                                 | 8                                                                 |                    |
| Density (calculated)              | 1.263 Mg/m <sup>3</sup>                                           |                    |
| Absorption coefficient            | 0.414 mm <sup>-1</sup>                                            |                    |
| F(000)                            | 1424                                                              |                    |
| Crystal size                      | 0.45 x 0.35 x 0.30 mm <sup>3</sup>                                |                    |
| Theta range for data collection   | 2.04 to 28.28°.                                                   |                    |
| Index ranges                      | -18 ≤ h ≤ 17, -16 ≤ k ≤ 19, -23 ≤ l ≤ 23                          |                    |
| Reflections collected             | 20383                                                             |                    |
| Independent reflections           | 8321 [R(int) = 0.0222]                                            |                    |
| Completeness to theta = 28.28°    | 100.0 %                                                           |                    |
| Absorption correction             | Semi-empirical from equivalents                                   |                    |
| Max. and min. transmission        | 0.883 and 0.840                                                   |                    |
| Refinement method                 | Full-matrix least-squares on F <sup>2</sup>                       |                    |
| Data / restraints / parameters    | 8321 / 2 / 373                                                    |                    |
| Goodness-of-fit on F <sup>2</sup> | 1.030                                                             |                    |
| Final R indices [I > 2σ(I)]       | R1 = 0.0267, wR2 = 0.0656                                         |                    |
| R indices (all data)              | R1 = 0.0303, wR2 = 0.0674                                         |                    |
| Absolute structure parameter      | 0.09(3)                                                           |                    |
| Largest diff. peak and hole       | 0.249 and -0.163 e.Å <sup>-3</sup>                                |                    |

Table 2. Atomic coordinates ( $\times 10^4$ ) and equivalent isotropic displacement parameters ( $\text{\AA}^2 \times 10^3$ ) for pei76\_0m.  $U(\text{eq})$  is defined as one third of the trace of the orthogonalized  $U^{ij}$  tensor.

|       | x        | y        | z        | $U(\text{eq})$ |
|-------|----------|----------|----------|----------------|
| Al(1) | 5546(1)  | 8422(1)  | 8594(1)  | 21(1)          |
| Al(2) | 575(1)   | 8995(1)  | 8505(1)  | 22(1)          |
| C(1)  | -435(2)  | 9439(1)  | 6308(1)  | 32(1)          |
| C(2)  | -1116(2) | 10924(1) | 6605(1)  | 35(1)          |
| C(3)  | -1674(1) | 9538(1)  | 7198(1)  | 33(1)          |
| C(4)  | -796(1)  | 9996(1)  | 6934(1)  | 25(1)          |
| C(5)  | 878(1)   | 10634(1) | 7498(1)  | 29(1)          |
| C(6)  | 1747(1)  | 10447(1) | 8126(1)  | 24(1)          |
| C(7)  | 2667(1)  | 10832(1) | 8371(1)  | 29(1)          |
| C(8)  | 3195(1)  | 10254(1) | 8955(1)  | 30(1)          |
| C(9)  | 2569(1)  | 9555(1)  | 9043(1)  | 26(1)          |
| C(10) | 2611(1)  | 8775(1)  | 9580(1)  | 32(1)          |
| C(11) | 1445(2)  | 7658(1)  | 10023(1) | 35(1)          |
| C(12) | 2335(2)  | 7070(2)  | 10364(1) | 53(1)          |
| C(13) | 1197(2)  | 8263(2)  | 10673(1) | 45(1)          |
| C(14) | 568(2)   | 7075(1)  | 9690(1)  | 47(1)          |
| C(15) | 4059(2)  | 10538(1) | 6787(1)  | 38(1)          |
| C(16) | 5779(2)  | 10411(1) | 7534(1)  | 34(1)          |
| C(17) | 5161(2)  | 9329(1)  | 6462(1)  | 36(1)          |
| C(18) | 4883(1)  | 9883(1)  | 7123(1)  | 29(1)          |
| C(19) | 3621(1)  | 8768(1)  | 7417(1)  | 29(1)          |
| C(20) | 3546(1)  | 7974(1)  | 7929(1)  | 24(1)          |
| C(21) | 2857(1)  | 7326(1)  | 7968(1)  | 26(1)          |
| C(22) | 3292(1)  | 6702(1)  | 8555(1)  | 25(1)          |
| C(23) | 4231(1)  | 7018(1)  | 8847(1)  | 24(1)          |
| C(24) | 5040(1)  | 6774(1)  | 9504(1)  | 28(1)          |
| C(25) | 6763(1)  | 7238(1)  | 10122(1) | 25(1)          |
| C(26) | 6442(2)  | 7770(1)  | 10783(1) | 34(1)          |
| C(27) | 7695(1)  | 7646(1)  | 9913(1)  | 32(1)          |
| C(28) | 6964(1)  | 6258(1)  | 10382(1) | 32(1)          |
| Cl(1) | 6654(1)  | 8080(1)  | 7929(1)  | 30(1)          |

|       |         |          |         |       |
|-------|---------|----------|---------|-------|
| Cl(2) | 5889(1) | 9514(1)  | 9401(1) | 32(1) |
| Cl(3) | 204(1)  | 7837(1)  | 7782(1) | 30(1) |
| Cl(4) | -501(1) | 9335(1)  | 9206(1) | 30(1) |
| N(1)  | 1694(1) | 9670(1)  | 8537(1) | 23(1) |
| N(2)  | 15(1)   | 10082(1) | 7652(1) | 21(1) |
| N(3)  | 1676(1) | 8232(1)  | 9360(1) | 26(1) |
| N(4)  | 4556(1) | 9278(1)  | 7731(1) | 24(1) |
| N(5)  | 4383(1) | 7790(1)  | 8464(1) | 22(1) |
| N(6)  | 5965(1) | 7258(1)  | 9396(1) | 21(1) |

---

Table 3. Bond lengths [ $\text{\AA}$ ] and angles [ $^\circ$ ] for pei76\_0m.

---

|             |            |
|-------------|------------|
| Al(1)-N(5)  | 1.8303(15) |
| Al(1)-Cl(1) | 2.1411(6)  |
| Al(1)-Cl(2) | 2.1482(6)  |
| Al(1)-N(4)  | 2.2354(14) |
| Al(1)-N(6)  | 2.2358(14) |
| Al(2)-N(1)  | 1.8269(15) |
| Al(2)-Cl(3) | 2.1442(6)  |
| Al(2)-Cl(4) | 2.1493(6)  |
| Al(2)-N(3)  | 2.2312(15) |
| Al(2)-N(2)  | 2.2384(14) |
| C(1)-C(4)   | 1.528(2)   |
| C(2)-C(4)   | 1.530(2)   |
| C(3)-C(4)   | 1.528(2)   |
| C(4)-N(2)   | 1.523(2)   |
| C(5)-C(6)   | 1.491(3)   |
| C(5)-N(2)   | 1.507(2)   |
| C(6)-N(1)   | 1.372(2)   |
| C(6)-C(7)   | 1.380(2)   |
| C(7)-C(8)   | 1.427(3)   |
| C(8)-C(9)   | 1.376(3)   |
| C(9)-N(1)   | 1.365(2)   |
| C(9)-C(10)  | 1.490(2)   |
| C(10)-N(3)  | 1.504(2)   |
| C(11)-C(14) | 1.511(3)   |
| C(11)-N(3)  | 1.521(2)   |
| C(11)-C(12) | 1.532(3)   |
| C(11)-C(13) | 1.539(3)   |
| C(15)-C(18) | 1.526(3)   |
| C(16)-C(18) | 1.522(3)   |
| C(17)-C(18) | 1.527(2)   |
| C(18)-N(4)  | 1.524(2)   |
| C(19)-C(20) | 1.500(2)   |
| C(19)-N(4)  | 1.504(2)   |
| C(20)-C(21) | 1.361(2)   |

|                   |            |
|-------------------|------------|
| C(20)-N(5)        | 1.368(2)   |
| C(21)-C(22)       | 1.431(3)   |
| C(22)-C(23)       | 1.379(2)   |
| C(23)-N(5)        | 1.366(2)   |
| C(23)-C(24)       | 1.488(2)   |
| C(24)-N(6)        | 1.503(2)   |
| C(25)-N(6)        | 1.517(2)   |
| C(25)-C(27)       | 1.523(3)   |
| C(25)-C(26)       | 1.533(2)   |
| C(25)-C(28)       | 1.537(2)   |
|                   |            |
| N(5)-Al(1)-Cl(1)  | 120.09(5)  |
| N(5)-Al(1)-Cl(2)  | 123.37(5)  |
| Cl(1)-Al(1)-Cl(2) | 116.54(3)  |
| N(5)-Al(1)-N(4)   | 78.58(6)   |
| Cl(1)-Al(1)-N(4)  | 99.92(4)   |
| Cl(2)-Al(1)-N(4)  | 92.52(4)   |
| N(5)-Al(1)-N(6)   | 78.27(6)   |
| Cl(1)-Al(1)-N(6)  | 91.79(4)   |
| Cl(2)-Al(1)-N(6)  | 100.05(4)  |
| N(4)-Al(1)-N(6)   | 156.85(5)  |
| N(1)-Al(2)-Cl(3)  | 124.50(5)  |
| N(1)-Al(2)-Cl(4)  | 121.07(5)  |
| Cl(3)-Al(2)-Cl(4) | 114.42(3)  |
| N(1)-Al(2)-N(3)   | 78.42(6)   |
| Cl(3)-Al(2)-N(3)  | 92.48(4)   |
| Cl(4)-Al(2)-N(3)  | 100.84(4)  |
| N(1)-Al(2)-N(2)   | 78.78(6)   |
| Cl(3)-Al(2)-N(2)  | 99.96(4)   |
| Cl(4)-Al(2)-N(2)  | 91.36(4)   |
| N(3)-Al(2)-N(2)   | 157.19(6)  |
| N(2)-C(4)-C(1)    | 110.62(14) |
| N(2)-C(4)-C(3)    | 106.43(13) |
| C(1)-C(4)-C(3)    | 110.73(15) |
| N(2)-C(4)-C(2)    | 110.46(14) |
| C(1)-C(4)-C(2)    | 109.26(14) |

|                   |            |
|-------------------|------------|
| C(3)-C(4)-C(2)    | 109.30(15) |
| C(6)-C(5)-N(2)    | 108.31(13) |
| N(1)-C(6)-C(7)    | 108.80(15) |
| N(1)-C(6)-C(5)    | 115.52(14) |
| C(7)-C(6)-C(5)    | 135.43(15) |
| C(6)-C(7)-C(8)    | 106.63(16) |
| C(9)-C(8)-C(7)    | 106.95(16) |
| N(1)-C(9)-C(8)    | 108.99(15) |
| N(1)-C(9)-C(10)   | 115.66(15) |
| C(8)-C(9)-C(10)   | 135.18(17) |
| C(9)-C(10)-N(3)   | 109.11(14) |
| C(14)-C(11)-N(3)  | 107.02(16) |
| C(14)-C(11)-C(12) | 109.96(18) |
| N(3)-C(11)-C(12)  | 110.74(16) |
| C(14)-C(11)-C(13) | 110.63(18) |
| N(3)-C(11)-C(13)  | 109.97(15) |
| C(12)-C(11)-C(13) | 108.52(17) |
| C(16)-C(18)-N(4)  | 107.00(14) |
| C(16)-C(18)-C(15) | 109.13(15) |
| N(4)-C(18)-C(15)  | 110.67(15) |
| C(16)-C(18)-C(17) | 110.14(16) |
| N(4)-C(18)-C(17)  | 110.93(14) |
| C(15)-C(18)-C(17) | 108.94(16) |
| C(20)-C(19)-N(4)  | 109.21(14) |
| C(21)-C(20)-N(5)  | 109.15(15) |
| C(21)-C(20)-C(19) | 135.57(16) |
| N(5)-C(20)-C(19)  | 115.10(15) |
| C(20)-C(21)-C(22) | 107.14(15) |
| C(23)-C(22)-C(21) | 106.30(15) |
| N(5)-C(23)-C(22)  | 108.86(15) |
| N(5)-C(23)-C(24)  | 115.15(14) |
| C(22)-C(23)-C(24) | 135.67(15) |
| C(23)-C(24)-N(6)  | 108.15(13) |
| N(6)-C(25)-C(27)  | 107.33(13) |
| N(6)-C(25)-C(26)  | 111.04(14) |
| C(27)-C(25)-C(26) | 110.31(15) |



|                   |            |
|-------------------|------------|
| N(6)-C(25)-C(28)  | 109.27(13) |
| C(27)-C(25)-C(28) | 109.72(15) |
| C(26)-C(25)-C(28) | 109.15(15) |
| C(9)-N(1)-C(6)    | 108.63(14) |
| C(9)-N(1)-Al(2)   | 125.77(11) |
| C(6)-N(1)-Al(2)   | 125.08(12) |
| C(5)-N(2)-C(4)    | 112.09(12) |
| C(5)-N(2)-Al(2)   | 109.27(10) |
| C(4)-N(2)-Al(2)   | 126.78(10) |
| C(10)-N(3)-C(11)  | 113.30(14) |
| C(10)-N(3)-Al(2)  | 109.67(10) |
| C(11)-N(3)-Al(2)  | 125.94(12) |
| C(19)-N(4)-C(18)  | 112.69(13) |
| C(19)-N(4)-Al(1)  | 109.21(10) |
| C(18)-N(4)-Al(1)  | 126.03(11) |
| C(23)-N(5)-C(20)  | 108.55(14) |
| C(23)-N(5)-Al(1)  | 125.48(11) |
| C(20)-N(5)-Al(1)  | 125.81(11) |
| C(24)-N(6)-C(25)  | 112.29(12) |
| C(24)-N(6)-Al(1)  | 109.06(10) |
| C(25)-N(6)-Al(1)  | 127.11(10) |

---

Symmetry transformations used to generate equivalent atoms:

Table 4. Anisotropic displacement parameters ( $\text{\AA}^2 \times 10^3$ ) for pei76\_0m. The anisotropic displacement factor exponent takes the form:  $-2\pi^2 [ h^2 a^{*2} U^{11} + \dots + 2 h k a^* b^* U^{12} ]$

|       | $U^{11}$ | $U^{22}$ | $U^{33}$ | $U^{23}$ | $U^{13}$ | $U^{12}$ |
|-------|----------|----------|----------|----------|----------|----------|
| Al(1) | 21(1)    | 19(1)    | 22(1)    | -4(1)    | 4(1)     | -2(1)    |
| Al(2) | 25(1)    | 18(1)    | 24(1)    | 0(1)     | 9(1)     | -1(1)    |
| C(1)  | 35(1)    | 34(1)    | 26(1)    | -4(1)    | 6(1)     | 4(1)     |
| C(2)  | 38(1)    | 36(1)    | 31(1)    | 6(1)     | 7(1)     | 13(1)    |
| C(3)  | 24(1)    | 40(1)    | 33(1)    | -4(1)    | 4(1)     | 0(1)     |
| C(4)  | 26(1)    | 27(1)    | 20(1)    | -2(1)    | 2(1)     | 4(1)     |
| C(5)  | 31(1)    | 24(1)    | 32(1)    | 8(1)     | 6(1)     | -4(1)    |
| C(6)  | 28(1)    | 20(1)    | 27(1)    | 0(1)     | 9(1)     | -2(1)    |
| C(7)  | 28(1)    | 24(1)    | 39(1)    | -6(1)    | 13(1)    | -3(1)    |
| C(8)  | 22(1)    | 30(1)    | 38(1)    | -11(1)   | 6(1)     | 0(1)     |
| C(9)  | 26(1)    | 27(1)    | 26(1)    | -5(1)    | 5(1)     | 4(1)     |
| C(10) | 33(1)    | 34(1)    | 25(1)    | 0(1)     | -1(1)    | 8(1)     |
| C(11) | 56(1)    | 28(1)    | 25(1)    | 9(1)     | 18(1)    | 13(1)    |
| C(12) | 80(2)    | 51(1)    | 34(1)    | 19(1)    | 22(1)    | 36(1)    |
| C(13) | 66(2)    | 47(1)    | 26(1)    | 4(1)     | 21(1)    | 17(1)    |
| C(14) | 77(2)    | 27(1)    | 44(1)    | 12(1)    | 26(1)    | 0(1)     |
| C(15) | 48(1)    | 33(1)    | 32(1)    | 8(1)     | 8(1)     | 10(1)    |
| C(16) | 40(1)    | 24(1)    | 38(1)    | 4(1)     | 9(1)     | -2(1)    |
| C(17) | 51(1)    | 33(1)    | 27(1)    | 1(1)     | 15(1)    | 5(1)     |
| C(18) | 38(1)    | 23(1)    | 27(1)    | 4(1)     | 11(1)    | 4(1)     |
| C(19) | 25(1)    | 33(1)    | 26(1)    | 3(1)     | -2(1)    | 1(1)     |
| C(20) | 24(1)    | 26(1)    | 21(1)    | -4(1)    | 2(1)     | 3(1)     |
| C(21) | 21(1)    | 35(1)    | 22(1)    | -9(1)    | 2(1)     | -1(1)    |
| C(22) | 25(1)    | 26(1)    | 26(1)    | -6(1)    | 7(1)     | -5(1)    |
| C(23) | 24(1)    | 23(1)    | 23(1)    | -2(1)    | 4(1)     | -2(1)    |
| C(24) | 30(1)    | 26(1)    | 28(1)    | 6(1)     | 2(1)     | -7(1)    |
| C(25) | 25(1)    | 30(1)    | 20(1)    | -4(1)    | -1(1)    | -1(1)    |
| C(26) | 41(1)    | 38(1)    | 23(1)    | -8(1)    | 5(1)     | -1(1)    |
| C(27) | 25(1)    | 39(1)    | 30(1)    | -5(1)    | -2(1)    | -4(1)    |
| C(28) | 33(1)    | 34(1)    | 27(1)    | 4(1)     | 0(1)     | 5(1)     |
| Cl(1) | 31(1)    | 25(1)    | 36(1)    | 5(1)     | 16(1)    | 5(1)     |

|       |       |       |       |       |       |       |
|-------|-------|-------|-------|-------|-------|-------|
| Cl(2) | 39(1) | 23(1) | 32(1) | -9(1) | -4(1) | 2(1)  |
| Cl(3) | 34(1) | 18(1) | 36(1) | -5(1) | 3(1)  | 1(1)  |
| Cl(4) | 36(1) | 26(1) | 33(1) | 4(1)  | 18(1) | 5(1)  |
| N(1)  | 24(1) | 20(1) | 25(1) | 2(1)  | 3(1)  | 0(1)  |
| N(2)  | 24(1) | 18(1) | 20(1) | 0(1)  | 5(1)  | 1(1)  |
| N(3)  | 36(1) | 22(1) | 21(1) | 3(1)  | 10(1) | 9(1)  |
| N(4)  | 27(1) | 23(1) | 20(1) | 0(1)  | 3(1)  | 2(1)  |
| N(5)  | 21(1) | 22(1) | 23(1) | 0(1)  | 1(1)  | -2(1) |
| N(6)  | 22(1) | 22(1) | 18(1) | -3(1) | 2(1)  | -2(1) |

---

Table 5. Hydrogen coordinates ( $\times 10^4$ ) and isotropic displacement parameters ( $\text{\AA}^2 \times 10^{-3}$ ) for pei76\_0m.

|        | x     | y     | z     | U(eq) |
|--------|-------|-------|-------|-------|
| H(1A)  | 94    | 9764  | 6119  | 47    |
| H(1B)  | -987  | 9334  | 5875  | 47    |
| H(1C)  | -180  | 8862  | 6529  | 47    |
| H(2A)  | -1281 | 11305 | 7020  | 52    |
| H(2B)  | -1698 | 10864 | 6190  | 52    |
| H(2C)  | -572  | 11199 | 6395  | 52    |
| H(3A)  | -2230 | 9497  | 6759  | 49    |
| H(3B)  | -1874 | 9891  | 7616  | 49    |
| H(3C)  | -1479 | 8934  | 7390  | 49    |
| H(5A)  | 1036  | 10474 | 6986  | 35    |
| H(5B)  | 709   | 11281 | 7493  | 35    |
| H(7)   | 2902  | 11376 | 8187  | 35    |
| H(8)   | 3853  | 10337 | 9231  | 36    |
| H(10A) | 2676  | 8990  | 10122 | 38    |
| H(10B) | 3194  | 8397  | 9545  | 38    |
| H(12A) | 2910  | 7452  | 10554 | 80    |
| H(12B) | 2490  | 6667  | 9960  | 80    |
| H(12C) | 2175  | 6713  | 10795 | 80    |
| H(13A) | 676   | 8689  | 10453 | 68    |
| H(13B) | 1791  | 8594  | 10916 | 68    |
| H(13C) | 965   | 7892  | 11066 | 68    |
| H(14A) | 733   | 6708  | 9267  | 71    |
| H(14B) | -4    | 7456  | 9489  | 71    |
| H(14C) | 408   | 6682  | 10098 | 71    |
| H(15A) | 3481  | 10201 | 6520  | 56    |
| H(15B) | 4294  | 10940 | 6417  | 56    |
| H(15C) | 3872  | 10893 | 7209  | 56    |
| H(16A) | 6019  | 10803 | 7159  | 51    |
| H(16B) | 6306  | 9994  | 7759  | 51    |
| H(16C) | 5588  | 10777 | 7948  | 51    |

|        |      |       |       |    |
|--------|------|-------|-------|----|
| H(17A) | 5654 | 8876  | 6676  | 54 |
| H(17B) | 5439 | 9724  | 6109  | 54 |
| H(17C) | 4568 | 9030  | 6175  | 54 |
| H(19A) | 3038 | 9164  | 7403  | 35 |
| H(19B) | 3632 | 8564  | 6881  | 35 |
| H(21)  | 2209 | 7294  | 7662  | 31 |
| H(22)  | 2992 | 6175  | 8712  | 31 |
| H(24A) | 5152 | 6117  | 9511  | 34 |
| H(24B) | 4857 | 6951  | 10004 | 34 |
| H(26A) | 6248 | 8378  | 10603 | 51 |
| H(26B) | 6995 | 7802  | 11226 | 51 |
| H(26C) | 5878 | 7469  | 10944 | 51 |
| H(27A) | 7881 | 7311  | 9480  | 49 |
| H(27B) | 8237 | 7617  | 10364 | 49 |
| H(27C) | 7568 | 8275  | 9759  | 49 |
| H(28A) | 7532 | 6236  | 10814 | 48 |
| H(28B) | 7111 | 5903  | 9946  | 48 |
| H(28C) | 6378 | 6011  | 10553 | 48 |
| H(2)   | -278 | 10472 | 7958  | 31 |
| H(3)   | 1878 | 7797  | 9042  | 39 |
| H(4)   | 4330 | 9696  | 8052  | 35 |
| H(6)   | 6223 | 6861  | 9075  | 32 |

---



Table 1. Crystal data and structure refinement for compound 5—ccdc936567.

|                                   |                                                    |                 |
|-----------------------------------|----------------------------------------------------|-----------------|
| Identification code               | compound 5—ccdc936567                              |                 |
| Empirical formula                 | C <sub>19</sub> H <sub>30</sub> AlClN <sub>4</sub> |                 |
| Formula weight                    | 376.90                                             |                 |
| Temperature                       | 150(2) K                                           |                 |
| Wavelength                        | 0.71073 Å                                          |                 |
| Crystal system                    | Triclinic                                          |                 |
| Space group                       | P -1                                               |                 |
| Unit cell dimensions              | a = 8.8099(5) Å                                    | α = 87.190(4)°. |
|                                   | b = 9.5732(5) Å                                    | β = 86.082(4)°. |
|                                   | c = 12.5602(7) Å                                   | γ = 76.421(3)°. |
| Volume                            | 1026.70(10) Å <sup>3</sup>                         |                 |
| Z                                 | 2                                                  |                 |
| Density (calculated)              | 1.219 Mg/m <sup>3</sup>                            |                 |
| Absorption coefficient            | 0.238 mm <sup>-1</sup>                             |                 |
| F(000)                            | 404                                                |                 |
| Crystal size                      | 0.45 x 0.30 x 0.30 mm <sup>3</sup>                 |                 |
| Theta range for data collection   | 1.63 to 28.78°.                                    |                 |
| Index ranges                      | -11 ≤ h ≤ 11, -12 ≤ k ≤ 12, -17 ≤ l ≤ 16           |                 |
| Reflections collected             | 20205                                              |                 |
| Independent reflections           | 5299 [R(int) = 0.0467]                             |                 |
| Completeness to theta = 28.78°    | 99.4 %                                             |                 |
| Absorption correction             | Semi-empirical from equivalents                    |                 |
| Max. and min. transmission        | 0.931 and 0.918                                    |                 |
| Refinement method                 | Full-matrix least-squares on F <sup>2</sup>        |                 |
| Data / restraints / parameters    | 5299 / 0 / 232                                     |                 |
| Goodness-of-fit on F <sup>2</sup> | 1.011                                              |                 |
| Final R indices [I > 2σ(I)]       | R1 = 0.0470, wR2 = 0.1188                          |                 |
| R indices (all data)              | R1 = 0.0767, wR2 = 0.1345                          |                 |
| Largest diff. peak and hole       | 0.263 and -0.271 e.Å <sup>-3</sup>                 |                 |

Table 2. Atomic coordinates ( $\times 10^4$ ) and equivalent isotropic displacement parameters ( $\text{\AA}^2 \times 10^3$ ) for pei294\_0m.  $U(\text{eq})$  is defined as one third of the trace of the orthogonalized  $U^{ij}$  tensor.

|       | x        | y        | z       | $U(\text{eq})$ |
|-------|----------|----------|---------|----------------|
| Al(1) | 3524(1)  | 786(1)   | 2582(1) | 37(1)          |
| Cl(1) | 5221(1)  | -934(1)  | 3314(1) | 57(1)          |
| N(1)  | 3737(2)  | 1599(2)  | 1251(1) | 38(1)          |
| N(2)  | 2838(2)  | -781(2)  | 1547(1) | 41(1)          |
| N(3)  | 4898(2)  | 2441(2)  | 2862(1) | 44(1)          |
| N(4)  | 1806(2)  | 1511(2)  | 3478(1) | 42(1)          |
| C(1)  | 1660(3)  | -1677(2) | 1884(2) | 52(1)          |
| C(2)  | 56(3)    | -686(3)  | 2082(2) | 68(1)          |
| C(3)  | 1617(3)  | -2746(3) | 1024(2) | 73(1)          |
| C(4)  | 2174(3)  | -2491(3) | 2915(2) | 71(1)          |
| C(5)  | 2666(3)  | -161(2)  | 437(2)  | 49(1)          |
| C(6)  | 3251(2)  | 1181(2)  | 338(1)  | 41(1)          |
| C(7)  | 3336(3)  | 2198(2)  | -452(2) | 55(1)          |
| C(8)  | 3874(3)  | 3298(2)  | 8(2)    | 57(1)          |
| C(9)  | 4103(2)  | 2906(2)  | 1056(2) | 44(1)          |
| C(10) | 4394(3)  | 3591(2)  | 2043(2) | 53(1)          |
| C(11) | 4595(3)  | 3047(3)  | 3938(2) | 69(1)          |
| C(12) | 6597(3)  | 1837(3)  | 2687(2) | 62(1)          |
| C(13) | 1820(3)  | 995(3)   | 4594(2) | 62(1)          |
| C(14) | 630(2)   | 2731(2)  | 3253(2) | 41(1)          |
| C(15) | 333(2)   | 3216(2)  | 2204(2) | 48(1)          |
| C(16) | -805(3)  | 4443(2)  | 1967(2) | 60(1)          |
| C(17) | -1704(3) | 5218(3)  | 2755(3) | 74(1)          |
| C(18) | -1458(3) | 4756(3)  | 3790(3) | 80(1)          |
| C(19) | -323(3)  | 3531(3)  | 4051(2) | 64(1)          |



Table 3. Bond lengths [Å] and angles [°] for pei294\_0m.

---

|                  |            |
|------------------|------------|
| Al(1)-N(1)       | 1.8254(15) |
| Al(1)-N(4)       | 1.8412(16) |
| Al(1)-Cl(1)      | 2.1621(7)  |
| Al(1)-N(2)       | 2.2425(16) |
| Al(1)-N(3)       | 2.2612(16) |
| N(1)-C(6)        | 1.361(2)   |
| N(1)-C(9)        | 1.370(2)   |
| N(2)-C(5)        | 1.491(2)   |
| N(2)-C(1)        | 1.522(2)   |
| N(3)-C(12)       | 1.478(3)   |
| N(3)-C(11)       | 1.480(3)   |
| N(3)-C(10)       | 1.480(3)   |
| N(4)-C(14)       | 1.399(2)   |
| N(4)-C(13)       | 1.463(2)   |
| C(1)-C(2)        | 1.518(3)   |
| C(1)-C(4)        | 1.517(3)   |
| C(1)-C(3)        | 1.532(3)   |
| C(5)-C(6)        | 1.489(3)   |
| C(6)-C(7)        | 1.367(3)   |
| C(7)-C(8)        | 1.414(3)   |
| C(8)-C(9)        | 1.366(3)   |
| C(9)-C(10)       | 1.495(3)   |
| C(14)-C(19)      | 1.398(3)   |
| C(14)-C(15)      | 1.396(3)   |
| C(15)-C(16)      | 1.389(3)   |
| C(16)-C(17)      | 1.360(4)   |
| C(17)-C(18)      | 1.367(4)   |
| C(18)-C(19)      | 1.393(4)   |
| <br>             |            |
| N(1)-Al(1)-N(4)  | 120.36(7)  |
| N(1)-Al(1)-Cl(1) | 126.10(6)  |
| N(4)-Al(1)-Cl(1) | 113.39(6)  |
| N(1)-Al(1)-N(2)  | 78.15(6)   |
| N(4)-Al(1)-N(2)  | 106.80(7)  |

|                  |            |
|------------------|------------|
| Cl(1)-Al(1)-N(2) | 90.63(5)   |
| N(1)-Al(1)-N(3)  | 77.24(6)   |
| N(4)-Al(1)-N(3)  | 97.55(7)   |
| Cl(1)-Al(1)-N(3) | 92.73(5)   |
| N(2)-Al(1)-N(3)  | 151.73(6)  |
| C(6)-N(1)-C(9)   | 108.72(16) |
| C(6)-N(1)-Al(1)  | 125.77(13) |
| C(9)-N(1)-Al(1)  | 124.16(13) |
| C(5)-N(2)-C(1)   | 113.14(15) |
| C(5)-N(2)-Al(1)  | 109.52(11) |
| C(1)-N(2)-Al(1)  | 124.83(12) |
| C(12)-N(3)-C(11) | 108.54(18) |
| C(12)-N(3)-C(10) | 108.92(17) |
| C(11)-N(3)-C(10) | 109.76(18) |
| C(12)-N(3)-Al(1) | 111.09(13) |
| C(11)-N(3)-Al(1) | 113.94(13) |
| C(10)-N(3)-Al(1) | 104.45(11) |
| C(14)-N(4)-C(13) | 115.30(16) |
| C(14)-N(4)-Al(1) | 125.08(12) |
| C(13)-N(4)-Al(1) | 118.16(14) |
| C(2)-C(1)-C(4)   | 109.4(2)   |
| C(2)-C(1)-N(2)   | 109.25(17) |
| C(4)-C(1)-N(2)   | 107.55(17) |
| C(2)-C(1)-C(3)   | 110.5(2)   |
| C(4)-C(1)-C(3)   | 109.63(19) |
| N(2)-C(1)-C(3)   | 110.51(18) |
| C(6)-C(5)-N(2)   | 109.62(15) |
| N(1)-C(6)-C(7)   | 108.79(18) |
| N(1)-C(6)-C(5)   | 115.62(16) |
| C(7)-C(6)-C(5)   | 135.42(18) |
| C(6)-C(7)-C(8)   | 106.85(18) |
| C(9)-C(8)-C(7)   | 107.41(18) |
| C(8)-C(9)-N(1)   | 108.20(18) |
| C(8)-C(9)-C(10)  | 137.48(18) |
| N(1)-C(9)-C(10)  | 113.50(16) |
| N(3)-C(10)-C(9)  | 108.18(16) |

|                   |            |
|-------------------|------------|
| C(19)-C(14)-N(4)  | 122.69(19) |
| C(19)-C(14)-C(15) | 115.88(19) |
| N(4)-C(14)-C(15)  | 121.42(16) |
| C(16)-C(15)-C(14) | 122.2(2)   |
| C(17)-C(16)-C(15) | 121.0(2)   |
| C(16)-C(17)-C(18) | 118.2(2)   |
| C(17)-C(18)-C(19) | 122.0(2)   |
| C(18)-C(19)-C(14) | 120.7(2)   |

---

Symmetry transformations used to generate equivalent atoms:

Table 4. Anisotropic displacement parameters ( $\text{\AA}^2 \times 10^3$ ) for pei294\_0m. The anisotropic displacement factor exponent takes the form:  $-2\pi^2 [ h^2 a^{*2} U^{11} + \dots + 2 h k a^* b^* U^{12} ]$

|       | U <sup>11</sup> | U <sup>22</sup> | U <sup>33</sup> | U <sup>23</sup> | U <sup>13</sup> | U <sup>12</sup> |
|-------|-----------------|-----------------|-----------------|-----------------|-----------------|-----------------|
| Al(1) | 36(1)           | 41(1)           | 33(1)           | 2(1)            | -1(1)           | -5(1)           |
| Cl(1) | 57(1)           | 54(1)           | 56(1)           | 6(1)            | -18(1)          | -1(1)           |
| N(1)  | 42(1)           | 37(1)           | 34(1)           | -1(1)           | 2(1)            | -9(1)           |
| N(2)  | 39(1)           | 39(1)           | 43(1)           | -2(1)           | -2(1)           | -8(1)           |
| N(3)  | 42(1)           | 52(1)           | 40(1)           | -7(1)           | 1(1)            | -15(1)          |
| N(4)  | 42(1)           | 51(1)           | 32(1)           | 0(1)            | 2(1)            | -10(1)          |
| C(1)  | 52(1)           | 47(1)           | 59(1)           | -8(1)           | 2(1)            | -18(1)          |
| C(2)  | 45(1)           | 75(2)           | 86(2)           | -18(1)          | 5(1)            | -20(1)          |
| C(3)  | 82(2)           | 60(1)           | 85(2)           | -19(1)          | 2(1)            | -32(1)          |
| C(4)  | 88(2)           | 58(1)           | 73(2)           | 11(1)           | 0(1)            | -33(1)          |
| C(5)  | 55(1)           | 55(1)           | 38(1)           | -7(1)           | -6(1)           | -14(1)          |
| C(6)  | 39(1)           | 47(1)           | 34(1)           | -2(1)           | 0(1)            | -3(1)           |
| C(7)  | 58(1)           | 64(1)           | 38(1)           | 6(1)            | -4(1)           | -7(1)           |
| C(8)  | 64(1)           | 50(1)           | 52(1)           | 15(1)           | 2(1)            | -11(1)          |
| C(9)  | 44(1)           | 40(1)           | 46(1)           | 2(1)            | 5(1)            | -9(1)           |
| C(10) | 58(1)           | 43(1)           | 60(1)           | -4(1)           | 4(1)            | -19(1)          |
| C(11) | 77(2)           | 85(2)           | 53(1)           | -25(1)          | 4(1)            | -35(1)          |
| C(12) | 41(1)           | 74(2)           | 73(2)           | -6(1)           | -2(1)           | -20(1)          |
| C(13) | 66(2)           | 78(2)           | 40(1)           | 6(1)            | 7(1)            | -16(1)          |
| C(14) | 33(1)           | 46(1)           | 47(1)           | -10(1)          | 3(1)            | -13(1)          |
| C(15) | 37(1)           | 49(1)           | 55(1)           | -1(1)           | 2(1)            | -6(1)           |
| C(16) | 47(1)           | 55(1)           | 78(2)           | 12(1)           | -4(1)           | -9(1)           |
| C(17) | 59(2)           | 51(1)           | 106(2)          | -11(1)          | -3(2)           | 1(1)            |
| C(18) | 62(2)           | 74(2)           | 96(2)           | -44(2)          | 11(2)           | 3(1)            |
| C(19) | 56(1)           | 76(2)           | 57(1)           | -24(1)          | 0(1)            | -7(1)           |

Table 5. Hydrogen coordinates ( $\times 10^4$ ) and isotropic displacement parameters ( $\text{\AA}^2 \times 10^{-3}$ ) for pei294\_0m.

|        | x     | y     | z     | U(eq) |
|--------|-------|-------|-------|-------|
| H(2)   | 3847  | -1459 | 1539  | 50    |
| H(2A)  | -251  | -120  | 1428  | 101   |
| H(2B)  | 92    | -38   | 2655  | 101   |
| H(2C)  | -708  | -1261 | 2291  | 101   |
| H(3A)  | 2678  | -3315 | 856   | 109   |
| H(3B)  | 1198  | -2220 | 379   | 109   |
| H(3C)  | 946   | -3389 | 1288  | 109   |
| H(4A)  | 2162  | -1805 | 3471  | 107   |
| H(4B)  | 3235  | -3087 | 2799  | 107   |
| H(4C)  | 1456  | -3106 | 3140  | 107   |
| H(5A)  | 3268  | -865  | -76   | 58    |
| H(5B)  | 1552  | 56    | 268   | 58    |
| H(7)   | 3082  | 2171  | -1173 | 65    |
| H(8)   | 4045  | 4152  | -346  | 68    |
| H(10A) | 5217  | 4133  | 1886  | 63    |
| H(10B) | 3426  | 4270  | 2305  | 63    |
| H(11A) | 5207  | 3770  | 3996  | 103   |
| H(11B) | 4899  | 2276  | 4479  | 103   |
| H(11C) | 3479  | 3497  | 4052  | 103   |
| H(12A) | 7156  | 2607  | 2711  | 92    |
| H(12B) | 6812  | 1400  | 1987  | 92    |
| H(12C) | 6951  | 1105  | 3245  | 92    |
| H(13A) | 803   | 794   | 4819  | 93    |
| H(13B) | 2023  | 1732  | 5043  | 93    |
| H(13C) | 2642  | 113   | 4668  | 93    |
| H(15)  | 930   | 2690  | 1634  | 58    |
| H(16)  | -958  | 4745  | 1242  | 73    |
| H(17)  | -2482 | 6058  | 2592  | 89    |
| H(18)  | -2079 | 5287  | 4348  | 95    |
| H(19)  | -195  | 3235  | 4778  | 76    |





Table 1. Crystal data and structure refinement for compound 6—ccdc-936568.

|                                   |                                                      |                  |
|-----------------------------------|------------------------------------------------------|------------------|
| Identification code               | compound 6—ccdc-936568                               |                  |
| Empirical formula                 | C <sub>21</sub> H <sub>34</sub> Al Cl N <sub>4</sub> |                  |
| Formula weight                    | 404.95                                               |                  |
| Temperature                       | 150(2) K                                             |                  |
| Wavelength                        | 0.71073 Å                                            |                  |
| Crystal system                    | Triclinic                                            |                  |
| Space group                       | P -1                                                 |                  |
| Unit cell dimensions              | a = 11.5583(7) Å                                     | α = 98.218(5)°.  |
|                                   | b = 11.9274(8) Å                                     | β = 104.901(5)°. |
|                                   | c = 18.6239(16) Å                                    | γ = 107.932(4)°. |
| Volume                            | 2290.7(3) Å <sup>3</sup>                             |                  |
| Z                                 | 4                                                    |                  |
| Density (calculated)              | 1.174 Mg/m <sup>3</sup>                              |                  |
| Absorption coefficient            | 0.218 mm <sup>-1</sup>                               |                  |
| F(000)                            | 872                                                  |                  |
| Crystal size                      | 0.35 x 0.30 x 0.25 mm <sup>3</sup>                   |                  |
| Theta range for data collection   | 1.17 to 28.88°.                                      |                  |
| Index ranges                      | -15 ≤ h ≤ 15, -13 ≤ k ≤ 16, -25 ≤ l ≤ 25             |                  |
| Reflections collected             | 34113                                                |                  |
| Independent reflections           | 11899 [R(int) = 0.0533]                              |                  |
| Completeness to theta = 28.88°    | 98.8 %                                               |                  |
| Absorption correction             | Semi-empirical from equivalents                      |                  |
| Max. and min. transmission        | 0.947 and 0.927                                      |                  |
| Refinement method                 | Full-matrix least-squares on F <sup>2</sup>          |                  |
| Data / restraints / parameters    | 11899 / 0 / 501                                      |                  |
| Goodness-of-fit on F <sup>2</sup> | 1.003                                                |                  |
| Final R indices [I > 2σ(I)]       | R1 = 0.0495, wR2 = 0.1224                            |                  |
| R indices (all data)              | R1 = 0.0999, wR2 = 0.1508                            |                  |
| Largest diff. peak and hole       | 0.273 and -0.205 e.Å <sup>-3</sup>                   |                  |



Table 2. Atomic coordinates ( $\times 10^4$ ) and equivalent isotropic displacement parameters ( $\text{\AA}^2 \times 10^3$ ) for bi1531\_0m.  $U(\text{eq})$  is defined as one third of the trace of the orthogonalized  $U^{ij}$  tensor.

|       | x       | y        | z       | $U(\text{eq})$ |
|-------|---------|----------|---------|----------------|
| Cl(1) | 3965(1) | 2861(1)  | 2543(1) | 55(1)          |
| Cl(2) | 7840(1) | 4025(1)  | 3749(1) | 62(1)          |
| Al(1) | 4107(1) | 1249(1)  | 1918(1) | 43(1)          |
| Al(2) | 8068(1) | 5498(1)  | 3172(1) | 49(1)          |
| N(1)  | 5547(2) | 1295(1)  | 1669(1) | 44(1)          |
| N(2)  | 3773(2) | 1901(1)  | 829(1)  | 44(1)          |
| N(3)  | 5472(2) | 1162(2)  | 3034(1) | 47(1)          |
| N(4)  | 2694(2) | -111(1)  | 1732(1) | 44(1)          |
| N(5)  | 7033(2) | 5275(2)  | 2201(1) | 46(1)          |
| N(6)  | 6237(2) | 5706(2)  | 3354(1) | 47(1)          |
| N(7)  | 9056(2) | 4684(2)  | 2456(1) | 58(1)          |
| N(8)  | 9298(2) | 6938(2)  | 3768(1) | 54(1)          |
| C(1)  | 2483(2) | 1746(2)  | 280(1)  | 51(1)          |
| C(2)  | 2643(2) | 2383(2)  | -364(1) | 73(1)          |
| C(3)  | 1798(2) | 2308(2)  | 740(2)  | 69(1)          |
| C(4)  | 1707(2) | 394(2)   | -62(1)  | 62(1)          |
| C(5)  | 4644(2) | 1603(2)  | 424(1)  | 52(1)          |
| C(6)  | 5763(2) | 1544(2)  | 1012(1) | 45(1)          |
| C(7)  | 6980(2) | 1628(2)  | 1046(1) | 54(1)          |
| C(8)  | 7537(2) | 1404(2)  | 1759(1) | 57(1)          |
| C(9)  | 6635(2) | 1205(2)  | 2124(1) | 48(1)          |
| C(10) | 6540(2) | 865(2)   | 2851(1) | 56(1)          |
| C(11) | 5084(2) | 620(2)   | 3659(1) | 57(1)          |
| C(12) | 4199(3) | 1202(3)  | 3895(2) | 80(1)          |
| C(13) | 4362(2) | -744(2)  | 3352(1) | 70(1)          |
| C(14) | 6259(3) | 879(3)   | 4353(1) | 81(1)          |
| C(15) | 2522(2) | -1279(2) | 1357(1) | 45(1)          |
| C(16) | 3551(2) | -1573(2) | 1253(1) | 59(1)          |
| C(17) | 3409(3) | -2735(2) | 903(2)  | 75(1)          |
| C(18) | 2217(3) | -3638(2) | 627(2)  | 83(1)          |
| C(19) | 1193(3) | -3373(2) | 713(2)  | 84(1)          |

|       |          |          |         |        |
|-------|----------|----------|---------|--------|
| C(20) | 1321(2)  | -2220(2) | 1074(1) | 67(1)  |
| C(21) | 1593(2)  | -12(2)   | 1951(1) | 60(1)  |
| C(22) | 6140(2)  | 6397(2)  | 4071(1) | 59(1)  |
| C(23) | 4733(2)  | 6159(3)  | 4009(2) | 82(1)  |
| C(24) | 6857(2)  | 7744(2)  | 4201(1) | 72(1)  |
| C(25) | 6744(3)  | 5942(3)  | 4738(1) | 87(1)  |
| C(26) | 5476(2)  | 5897(2)  | 2637(1) | 54(1)  |
| C(27) | 5866(2)  | 5406(2)  | 1999(1) | 46(1)  |
| C(28) | 5367(2)  | 5103(2)  | 1217(1) | 56(1)  |
| C(29) | 6271(2)  | 4784(2)  | 928(1)  | 60(1)  |
| C(30) | 7280(2)  | 4908(2)  | 1546(1) | 50(1)  |
| C(31) | 8567(2)  | 4821(2)  | 1662(1) | 65(1)  |
| C(32) | 10478(2) | 4875(3)  | 2703(2) | 78(1)  |
| C(33) | 11266(2) | 6229(3)  | 2839(2) | 91(1)  |
| C(34) | 10775(3) | 4454(3)  | 3440(2) | 102(1) |
| C(35) | 10796(3) | 4122(3)  | 2091(2) | 107(1) |
| C(36) | 9505(2)  | 8062(2)  | 3587(1) | 49(1)  |
| C(37) | 8823(2)  | 8161(2)  | 2879(1) | 58(1)  |
| C(38) | 8950(2)  | 9262(2)  | 2702(1) | 65(1)  |
| C(39) | 9785(3)  | 10322(2) | 3212(2) | 72(1)  |
| C(40) | 10486(3) | 10253(2) | 3897(2) | 83(1)  |
| C(41) | 10379(2) | 9159(2)  | 4094(2) | 73(1)  |
| C(42) | 10096(2) | 6972(2)  | 4533(1) | 78(1)  |

---

Table 3. Bond lengths [ $\text{\AA}$ ] and angles [ $^\circ$ ] for bi1531\_0m.

---

|             |            |
|-------------|------------|
| Cl(1)-Al(1) | 2.1748(8)  |
| Cl(2)-Al(2) | 2.1710(9)  |
| Al(1)-N(4)  | 1.8259(16) |
| Al(1)-N(1)  | 1.8273(17) |
| Al(1)-N(2)  | 2.2584(17) |
| Al(1)-N(3)  | 2.3018(17) |
| Al(2)-N(5)  | 1.8240(17) |
| Al(2)-N(8)  | 1.8275(17) |
| Al(2)-N(7)  | 2.264(2)   |
| Al(2)-N(6)  | 2.3064(18) |
| N(1)-C(6)   | 1.366(2)   |
| N(1)-C(9)   | 1.369(2)   |
| N(2)-C(5)   | 1.496(3)   |
| N(2)-C(1)   | 1.515(2)   |
| N(3)-C(10)  | 1.489(3)   |
| N(3)-C(11)  | 1.509(3)   |
| N(4)-C(15)  | 1.395(2)   |
| N(4)-C(21)  | 1.465(3)   |
| N(5)-C(30)  | 1.367(3)   |
| N(5)-C(27)  | 1.367(2)   |
| N(6)-C(26)  | 1.488(3)   |
| N(6)-C(22)  | 1.515(3)   |
| N(7)-C(31)  | 1.492(3)   |
| N(7)-C(32)  | 1.522(3)   |
| N(8)-C(36)  | 1.393(3)   |
| N(8)-C(42)  | 1.472(3)   |
| C(1)-C(3)   | 1.524(3)   |
| C(1)-C(4)   | 1.526(3)   |
| C(1)-C(2)   | 1.528(3)   |
| C(5)-C(6)   | 1.492(3)   |
| C(6)-C(7)   | 1.363(3)   |
| C(7)-C(8)   | 1.421(3)   |
| C(8)-C(9)   | 1.365(3)   |
| C(9)-C(10)  | 1.489(3)   |

|                  |           |
|------------------|-----------|
| C(11)-C(12)      | 1.518(3)  |
| C(11)-C(13)      | 1.524(3)  |
| C(11)-C(14)      | 1.528(3)  |
| C(15)-C(16)      | 1.390(3)  |
| C(15)-C(20)      | 1.400(3)  |
| C(16)-C(17)      | 1.386(3)  |
| C(17)-C(18)      | 1.373(4)  |
| C(18)-C(19)      | 1.357(4)  |
| C(19)-C(20)      | 1.387(4)  |
| C(22)-C(24)      | 1.515(3)  |
| C(22)-C(25)      | 1.518(3)  |
| C(22)-C(23)      | 1.533(3)  |
| C(26)-C(27)      | 1.483(3)  |
| C(27)-C(28)      | 1.368(3)  |
| C(28)-C(29)      | 1.414(3)  |
| C(29)-C(30)      | 1.364(3)  |
| C(30)-C(31)      | 1.486(3)  |
| C(32)-C(34)      | 1.520(4)  |
| C(32)-C(35)      | 1.539(4)  |
| C(32)-C(33)      | 1.536(4)  |
| C(36)-C(37)      | 1.394(3)  |
| C(36)-C(41)      | 1.402(3)  |
| C(37)-C(38)      | 1.372(3)  |
| C(38)-C(39)      | 1.366(3)  |
| C(39)-C(40)      | 1.353(4)  |
| C(40)-C(41)      | 1.383(4)  |
|                  |           |
| N(4)-Al(1)-N(1)  | 125.46(8) |
| N(4)-Al(1)-Cl(1) | 112.71(6) |
| N(1)-Al(1)-Cl(1) | 121.76(6) |
| N(4)-Al(1)-N(2)  | 104.70(7) |
| N(1)-Al(1)-N(2)  | 78.24(7)  |
| Cl(1)-Al(1)-N(2) | 90.90(5)  |
| N(4)-Al(1)-N(3)  | 102.39(7) |
| N(1)-Al(1)-N(3)  | 76.85(7)  |
| Cl(1)-Al(1)-N(3) | 89.07(5)  |

|                  |            |
|------------------|------------|
| N(2)-Al(1)-N(3)  | 150.59(6)  |
| N(5)-Al(2)-N(8)  | 125.31(8)  |
| N(5)-Al(2)-Cl(2) | 120.89(6)  |
| N(8)-Al(2)-Cl(2) | 113.72(6)  |
| N(5)-Al(2)-N(7)  | 77.99(8)   |
| N(8)-Al(2)-N(7)  | 104.84(8)  |
| Cl(2)-Al(2)-N(7) | 90.92(6)   |
| N(5)-Al(2)-N(6)  | 76.66(7)   |
| N(8)-Al(2)-N(6)  | 101.52(7)  |
| Cl(2)-Al(2)-N(6) | 89.81(5)   |
| N(7)-Al(2)-N(6)  | 150.82(7)  |
| C(6)-N(1)-C(9)   | 107.92(16) |
| C(6)-N(1)-Al(1)  | 124.92(13) |
| C(9)-N(1)-Al(1)  | 126.88(14) |
| C(5)-N(2)-C(1)   | 112.46(15) |
| C(5)-N(2)-Al(1)  | 107.43(12) |
| C(1)-N(2)-Al(1)  | 126.22(12) |
| C(10)-N(3)-C(11) | 113.79(16) |
| C(10)-N(3)-Al(1) | 108.11(12) |
| C(11)-N(3)-Al(1) | 126.27(13) |
| C(15)-N(4)-C(21) | 114.49(16) |
| C(15)-N(4)-Al(1) | 125.72(13) |
| C(21)-N(4)-Al(1) | 119.73(13) |
| C(30)-N(5)-C(27) | 108.08(17) |
| C(30)-N(5)-Al(2) | 125.34(14) |
| C(27)-N(5)-Al(2) | 126.55(14) |
| C(26)-N(6)-C(22) | 113.17(16) |
| C(26)-N(6)-Al(2) | 108.15(12) |
| C(22)-N(6)-Al(2) | 126.69(12) |
| C(31)-N(7)-C(32) | 112.95(19) |
| C(31)-N(7)-Al(2) | 107.36(13) |
| C(32)-N(7)-Al(2) | 125.23(16) |
| C(36)-N(8)-C(42) | 115.02(17) |
| C(36)-N(8)-Al(2) | 125.54(13) |
| C(42)-N(8)-Al(2) | 119.26(15) |
| N(2)-C(1)-C(3)   | 107.21(16) |

|                   |            |
|-------------------|------------|
| N(2)-C(1)-C(4)    | 109.24(17) |
| C(3)-C(1)-C(4)    | 110.06(19) |
| N(2)-C(1)-C(2)    | 111.19(17) |
| C(3)-C(1)-C(2)    | 109.6(2)   |
| C(4)-C(1)-C(2)    | 109.55(18) |
| C(6)-C(5)-N(2)    | 107.81(16) |
| C(7)-C(6)-N(1)    | 109.48(18) |
| C(7)-C(6)-C(5)    | 135.18(19) |
| N(1)-C(6)-C(5)    | 115.26(17) |
| C(6)-C(7)-C(8)    | 106.56(19) |
| C(9)-C(8)-C(7)    | 107.15(19) |
| C(8)-C(9)-N(1)    | 108.88(19) |
| C(8)-C(9)-C(10)   | 136.0(2)   |
| N(1)-C(9)-C(10)   | 115.03(18) |
| N(3)-C(10)-C(9)   | 108.51(16) |
| N(3)-C(11)-C(12)  | 107.68(18) |
| N(3)-C(11)-C(13)  | 109.59(17) |
| C(12)-C(11)-C(13) | 109.2(2)   |
| N(3)-C(11)-C(14)  | 110.76(19) |
| C(12)-C(11)-C(14) | 109.2(2)   |
| C(13)-C(11)-C(14) | 110.4(2)   |
| C(16)-C(15)-N(4)  | 121.21(17) |
| C(16)-C(15)-C(20) | 116.20(19) |
| N(4)-C(15)-C(20)  | 122.6(2)   |
| C(17)-C(16)-C(15) | 122.3(2)   |
| C(18)-C(17)-C(16) | 120.2(3)   |
| C(19)-C(18)-C(17) | 118.8(2)   |
| C(18)-C(19)-C(20) | 121.8(2)   |
| C(19)-C(20)-C(15) | 120.8(2)   |
| N(6)-C(22)-C(24)  | 110.06(19) |
| N(6)-C(22)-C(25)  | 107.47(19) |
| C(24)-C(22)-C(25) | 109.7(2)   |
| N(6)-C(22)-C(23)  | 110.71(18) |
| C(24)-C(22)-C(23) | 109.9(2)   |
| C(25)-C(22)-C(23) | 108.9(2)   |
| C(27)-C(26)-N(6)  | 107.93(16) |

|                   |            |
|-------------------|------------|
| N(5)-C(27)-C(28)  | 108.76(19) |
| N(5)-C(27)-C(26)  | 115.98(16) |
| C(28)-C(27)-C(26) | 135.1(2)   |
| C(27)-C(28)-C(29) | 107.15(19) |
| C(30)-C(29)-C(28) | 106.85(19) |
| C(29)-C(30)-N(5)  | 109.2(2)   |
| C(29)-C(30)-C(31) | 135.6(2)   |
| N(5)-C(30)-C(31)  | 115.11(18) |
| C(30)-C(31)-N(7)  | 108.44(18) |
| C(34)-C(32)-N(7)  | 107.0(2)   |
| C(34)-C(32)-C(35) | 109.2(3)   |
| N(7)-C(32)-C(35)  | 110.9(2)   |
| C(34)-C(32)-C(33) | 110.6(3)   |
| N(7)-C(32)-C(33)  | 109.3(2)   |
| C(35)-C(32)-C(33) | 109.7(2)   |
| N(8)-C(36)-C(37)  | 121.08(18) |
| N(8)-C(36)-C(41)  | 123.4(2)   |
| C(37)-C(36)-C(41) | 115.5(2)   |
| C(38)-C(37)-C(36) | 122.4(2)   |
| C(39)-C(38)-C(37) | 121.1(2)   |
| C(40)-C(39)-C(38) | 117.9(2)   |
| C(39)-C(40)-C(41) | 122.4(2)   |
| C(40)-C(41)-C(36) | 120.7(2)   |

---

Symmetry transformations used to generate equivalent atoms:

Table 4. Anisotropic displacement parameters ( $\text{\AA}^2 \times 10^3$ ) for bi1531\_0m. The anisotropic displacement factor exponent takes the form:  $-2\pi^2 [ h^2 a^{*2} U^{11} + \dots + 2 h k a^* b^* U^{12} ]$

|       | $U^{11}$ | $U^{22}$ | $U^{33}$ | $U^{23}$ | $U^{13}$ | $U^{12}$ |
|-------|----------|----------|----------|----------|----------|----------|
| Cl(1) | 62(1)    | 44(1)    | 54(1)    | 3(1)     | 15(1)    | 21(1)    |
| Cl(2) | 62(1)    | 56(1)    | 66(1)    | 25(1)    | 12(1)    | 20(1)    |
| Al(1) | 42(1)    | 37(1)    | 48(1)    | 6(1)     | 16(1)    | 12(1)    |
| Al(2) | 46(1)    | 45(1)    | 43(1)    | 10(1)    | 2(1)     | 12(1)    |
| N(1)  | 42(1)    | 45(1)    | 46(1)    | 13(1)    | 14(1)    | 16(1)    |
| N(2)  | 43(1)    | 41(1)    | 44(1)    | 10(1)    | 11(1)    | 15(1)    |
| N(3)  | 50(1)    | 44(1)    | 44(1)    | 12(1)    | 12(1)    | 15(1)    |
| N(4)  | 42(1)    | 40(1)    | 49(1)    | 9(1)     | 17(1)    | 12(1)    |
| N(5)  | 49(1)    | 44(1)    | 39(1)    | 3(1)     | 8(1)     | 16(1)    |
| N(6)  | 47(1)    | 46(1)    | 41(1)    | 5(1)     | 8(1)     | 16(1)    |
| N(7)  | 54(1)    | 53(1)    | 72(1)    | 17(1)    | 23(1)    | 22(1)    |
| N(8)  | 47(1)    | 53(1)    | 46(1)    | 9(1)     | -4(1)    | 10(1)    |
| C(1)  | 48(1)    | 55(1)    | 48(1)    | 14(1)    | 8(1)     | 20(1)    |
| C(2)  | 70(2)    | 80(2)    | 62(2)    | 33(1)    | 6(1)     | 23(1)    |
| C(3)  | 61(1)    | 75(2)    | 75(2)    | 15(1)    | 12(1)    | 39(1)    |
| C(4)  | 50(1)    | 60(1)    | 63(1)    | 8(1)     | 6(1)     | 15(1)    |
| C(5)  | 53(1)    | 56(1)    | 46(1)    | 15(1)    | 20(1)    | 17(1)    |
| C(6)  | 48(1)    | 39(1)    | 48(1)    | 9(1)     | 20(1)    | 14(1)    |
| C(7)  | 55(1)    | 52(1)    | 62(1)    | 17(1)    | 30(1)    | 20(1)    |
| C(8)  | 46(1)    | 57(1)    | 75(2)    | 18(1)    | 23(1)    | 26(1)    |
| C(9)  | 44(1)    | 46(1)    | 55(1)    | 13(1)    | 12(1)    | 18(1)    |
| C(10) | 52(1)    | 60(1)    | 59(1)    | 22(1)    | 12(1)    | 24(1)    |
| C(11) | 62(1)    | 60(1)    | 42(1)    | 18(1)    | 12(1)    | 16(1)    |
| C(12) | 102(2)   | 98(2)    | 60(2)    | 29(2)    | 42(2)    | 43(2)    |
| C(13) | 74(2)    | 65(2)    | 61(2)    | 27(1)    | 16(1)    | 13(1)    |
| C(14) | 83(2)    | 89(2)    | 51(1)    | 25(1)    | 3(1)     | 15(2)    |
| C(15) | 51(1)    | 40(1)    | 38(1)    | 11(1)    | 13(1)    | 10(1)    |
| C(16) | 62(1)    | 42(1)    | 72(2)    | 10(1)    | 30(1)    | 13(1)    |
| C(17) | 96(2)    | 52(1)    | 86(2)    | 14(1)    | 49(2)    | 26(1)    |
| C(18) | 113(2)   | 43(1)    | 85(2)    | 0(1)     | 45(2)    | 12(2)    |
| C(19) | 83(2)    | 50(2)    | 88(2)    | -6(1)    | 22(2)    | -4(1)    |



|       |        |        |        |        |        |       |
|-------|--------|--------|--------|--------|--------|-------|
| C(20) | 57(1)  | 51(1)  | 74(2)  | 5(1)   | 14(1)  | 5(1)  |
| C(21) | 48(1)  | 62(1)  | 69(2)  | 12(1)  | 24(1)  | 16(1) |
| C(22) | 58(1)  | 67(2)  | 50(1)  | 5(1)   | 20(1)  | 24(1) |
| C(23) | 70(2)  | 96(2)  | 80(2)  | 6(2)   | 34(1)  | 25(2) |
| C(24) | 71(2)  | 69(2)  | 61(2)  | -11(1) | 18(1)  | 22(1) |
| C(25) | 108(2) | 116(2) | 46(1)  | 20(2)  | 27(1)  | 50(2) |
| C(26) | 52(1)  | 54(1)  | 50(1)  | 6(1)   | 6(1)   | 24(1) |
| C(27) | 47(1)  | 41(1)  | 43(1)  | 7(1)   | 4(1)   | 14(1) |
| C(28) | 66(1)  | 47(1)  | 42(1)  | 12(1)  | -2(1)  | 18(1) |
| C(29) | 84(2)  | 50(1)  | 37(1)  | 11(1)  | 13(1)  | 19(1) |
| C(30) | 65(1)  | 41(1)  | 43(1)  | 8(1)   | 19(1)  | 15(1) |
| C(31) | 69(2)  | 64(2)  | 63(2)  | 11(1)  | 30(1)  | 22(1) |
| C(32) | 55(1)  | 80(2)  | 109(2) | 29(2)  | 32(2)  | 31(1) |
| C(33) | 53(1)  | 83(2)  | 127(3) | 24(2)  | 26(2)  | 16(1) |
| C(34) | 64(2)  | 123(3) | 135(3) | 60(2)  | 26(2)  | 50(2) |
| C(35) | 84(2)  | 101(2) | 159(3) | 25(2)  | 63(2)  | 48(2) |
| C(36) | 41(1)  | 47(1)  | 50(1)  | 4(1)   | 9(1)   | 12(1) |
| C(37) | 60(1)  | 49(1)  | 50(1)  | 7(1)   | 6(1)   | 11(1) |
| C(38) | 68(2)  | 57(1)  | 62(1)  | 16(1)  | 13(1)  | 17(1) |
| C(39) | 79(2)  | 49(1)  | 80(2)  | 14(1)  | 20(1)  | 19(1) |
| C(40) | 84(2)  | 50(1)  | 81(2)  | -4(1)  | 2(2)   | 8(1)  |
| C(41) | 66(2)  | 57(2)  | 64(2)  | 2(1)   | -6(1)  | 9(1)  |
| C(42) | 69(2)  | 74(2)  | 61(2)  | 16(1)  | -15(1) | 15(1) |

---

Table 5. Hydrogen coordinates ( $\times 10^4$ ) and isotropic displacement parameters ( $\text{\AA}^2 \times 10^{-3}$ ) for bi1531\_0m.

|        | x    | y     | z    | U(eq) |
|--------|------|-------|------|-------|
| H(2)   | 4193 | 2806  | 1057 | 53    |
| H(3)   | 5829 | 2023  | 3222 | 56    |
| H(6)   | 5852 | 4882  | 3317 | 56    |
| H(7B)  | 8629 | 3858  | 2430 | 70    |
| H(2A)  | 2987 | 1958  | -696 | 110   |
| H(2B)  | 3237 | 3224  | -143 | 110   |
| H(2C)  | 1808 | 2375  | -664 | 110   |
| H(3A)  | 2307 | 3173  | 960  | 104   |
| H(3B)  | 1697 | 1899  | 1152 | 104   |
| H(3C)  | 952  | 2213  | 403  | 104   |
| H(4A)  | 1654 | -22   | 352  | 93    |
| H(4B)  | 2130 | 51    | -380 | 93    |
| H(4C)  | 841  | 287   | -376 | 93    |
| H(5A)  | 4183 | 813   | 44   | 62    |
| H(5B)  | 4938 | 2236  | 153  | 62    |
| H(7)   | 7378 | 1802  | 667  | 64    |
| H(8)   | 8379 | 1395  | 1947 | 68    |
| H(10A) | 6370 | -14   | 2794 | 67    |
| H(10B) | 7356 | 1319  | 3271 | 67    |
| H(12A) | 3438 | 1030  | 3453 | 121   |
| H(12B) | 4651 | 2082  | 4081 | 121   |
| H(12C) | 3934 | 870   | 4304 | 121   |
| H(13A) | 4926 | -1123 | 3193 | 104   |
| H(13B) | 3606 | -896  | 2912 | 104   |
| H(13C) | 4090 | -1091 | 3754 | 104   |
| H(14A) | 6728 | 1757  | 4533 | 121   |
| H(14B) | 6820 | 482   | 4207 | 121   |
| H(14C) | 5983 | 564   | 4763 | 121   |
| H(16)  | 4380 | -956  | 1428 | 70    |
| H(17)  | 4139 | -2908 | 855  | 90    |

|        |       |       |      |     |
|--------|-------|-------|------|-----|
| H(18)  | 2112  | -4434 | 380  | 100 |
| H(19)  | 366   | -3994 | 522  | 101 |
| H(20)  | 585   | -2068 | 1130 | 80  |
| H(21A) | 1390  | -563  | 2281 | 90  |
| H(21B) | 850   | -233  | 1490 | 90  |
| H(21C) | 1802  | 824   | 2227 | 90  |
| H(23A) | 4687  | 6542  | 4498 | 124 |
| H(23B) | 4261  | 5282  | 3887 | 124 |
| H(23C) | 4352  | 6502  | 3603 | 124 |
| H(24A) | 7767  | 7895  | 4273 | 107 |
| H(24B) | 6771  | 8185  | 4658 | 107 |
| H(24C) | 6498  | 8025  | 3755 | 107 |
| H(25A) | 7653  | 6116  | 4793 | 131 |
| H(25B) | 6301  | 5064  | 4642 | 131 |
| H(25C) | 6669  | 6353  | 5209 | 131 |
| H(26A) | 4548  | 5472  | 2541 | 64  |
| H(26B) | 5642  | 6774  | 2683 | 64  |
| H(28)  | 4564  | 5107  | 924  | 68  |
| H(29)  | 6190  | 4531  | 405  | 72  |
| H(31A) | 9163  | 5563  | 1590 | 78  |
| H(31B) | 8506  | 4113  | 1285 | 78  |
| H(33A) | 12183 | 6365  | 3037 | 136 |
| H(33B) | 11033 | 6709  | 3212 | 136 |
| H(33C) | 11085 | 6477  | 2355 | 136 |
| H(34A) | 10213 | 3609  | 3352 | 152 |
| H(34B) | 10630 | 4968  | 3841 | 152 |
| H(34C) | 11673 | 4514  | 3600 | 152 |
| H(35A) | 10199 | 3278  | 1948 | 160 |
| H(35B) | 11677 | 4149  | 2297 | 160 |
| H(35C) | 10714 | 4459  | 1638 | 160 |
| H(37)  | 8250  | 7441  | 2505 | 69  |
| H(38)  | 8449  | 9287  | 2217 | 78  |
| H(39)  | 9870  | 11084 | 3089 | 86  |
| H(40)  | 11073 | 10983 | 4256 | 100 |
| H(41)  | 10902 | 9151  | 4577 | 87  |
| H(42A) | 9956  | 7513  | 4923 | 117 |

|        |       |      |      |     |
|--------|-------|------|------|-----|
| H(42B) | 11003 | 7273 | 4566 | 117 |
| H(42C) | 9860  | 6152 | 4620 | 117 |

---



Table 1. Crystal data and structure refinement for compound 7—ccdc-936569.

|                                   |                                                                  |                   |
|-----------------------------------|------------------------------------------------------------------|-------------------|
| Identification code               | compound 7—ccdc-936569                                           |                   |
| Empirical formula                 | C <sub>28</sub> H <sub>40</sub> Al N <sub>3</sub> O <sub>2</sub> |                   |
| Formula weight                    | 477.61                                                           |                   |
| Temperature                       | 150(2) K                                                         |                   |
| Wavelength                        | 0.71073 Å                                                        |                   |
| Crystal system                    | Monoclinic                                                       |                   |
| Space group                       | P 21/c                                                           |                   |
| Unit cell dimensions              | a = 9.6058(17) Å                                                 | α = 90°.          |
|                                   | b = 27.908(5) Å                                                  | β = 104.168(12)°. |
|                                   | c = 10.519(2) Å                                                  | γ = 90°.          |
| Volume                            | 2734.2(9) Å <sup>3</sup>                                         |                   |
| Z                                 | 4                                                                |                   |
| Density (calculated)              | 1.160 Mg/m <sup>3</sup>                                          |                   |
| Absorption coefficient            | 0.102 mm <sup>-1</sup>                                           |                   |
| F(000)                            | 1032                                                             |                   |
| Crystal size                      | 0.45 x 0.35 x 0.30 mm <sup>3</sup>                               |                   |
| Theta range for data collection   | 2.19 to 28.28°.                                                  |                   |
| Index ranges                      | -12 ≤ h ≤ 12, -37 ≤ k ≤ 37, -14 ≤ l ≤ 13                         |                   |
| Reflections collected             | 32096                                                            |                   |
| Independent reflections           | 6685 [R(int) = 0.0699]                                           |                   |
| Completeness to theta = 28.28°    | 98.6 %                                                           |                   |
| Absorption correction             | Semi-empirical from equivalents                                  |                   |
| Max. and min. transmission        | 0.970 and 0.958                                                  |                   |
| Refinement method                 | Full-matrix least-squares on F <sup>2</sup>                      |                   |
| Data / restraints / parameters    | 6685 / 0 / 315                                                   |                   |
| Goodness-of-fit on F <sup>2</sup> | 1.004                                                            |                   |
| Final R indices [I > 2σ(I)]       | R1 = 0.0607, wR2 = 0.1808                                        |                   |
| R indices (all data)              | R1 = 0.1055, wR2 = 0.2063                                        |                   |
| Largest diff. peak and hole       | 0.679 and -0.322 e.Å <sup>-3</sup>                               |                   |

Table 2. Atomic coordinates ( $\times 10^4$ ) and equivalent isotropic displacement parameters ( $\text{\AA}^2 \times 10^3$ ) for bi155\_0m.  $U(\text{eq})$  is defined as one third of the trace of the orthogonalized  $U^{ij}$  tensor.

|       | x       | y       | z        | $U(\text{eq})$ |
|-------|---------|---------|----------|----------------|
| Al(1) | 4948(1) | 1038(1) | 3928(1)  | 43(1)          |
| N(1)  | 5347(2) | 852(1)  | 5647(2)  | 43(1)          |
| N(2)  | 6281(2) | 414(1)  | 3834(2)  | 44(1)          |
| N(3)  | 3727(2) | 1608(1) | 4985(2)  | 52(1)          |
| O(1)  | 3474(2) | 809(1)  | 2820(1)  | 48(1)          |
| O(2)  | 5844(2) | 1489(1) | 3329(1)  | 48(1)          |
| C(15) | 2673(2) | 889(1)  | 1593(2)  | 41(1)          |
| C(6)  | 6275(2) | 486(1)  | 6142(2)  | 45(1)          |
| C(20) | 1379(2) | 640(1)  | 1161(2)  | 45(1)          |
| C(22) | 6492(2) | 1896(1) | 3854(2)  | 41(1)          |
| C(16) | 3070(3) | 1212(1) | 746(2)   | 51(1)          |
| C(5)  | 6979(3) | 249(1)  | 5194(2)  | 52(1)          |
| C(11) | 2396(3) | 1887(1) | 4399(2)  | 51(1)          |
| C(19) | 518(2)  | 726(1)  | -81(2)   | 54(1)          |
| C(18) | 894(3)  | 1055(1) | -925(2)  | 54(1)          |
| C(9)  | 4904(3) | 1056(1) | 6664(2)  | 50(1)          |
| C(23) | 7349(2) | 1914(1) | 5123(2)  | 52(1)          |
| C(27) | 6330(3) | 2310(1) | 3121(2)  | 56(1)          |
| C(17) | 2184(3) | 1295(1) | -494(2)  | 56(1)          |
| C(24) | 7956(3) | 2342(1) | 5642(2)  | 61(1)          |
| C(10) | 3837(3) | 1444(1) | 6344(2)  | 60(1)          |
| C(1)  | 7249(3) | 379(1)  | 2908(3)  | 57(1)          |
| C(8)  | 5541(3) | 817(1)  | 7797(2)  | 62(1)          |
| C(7)  | 6403(3) | 456(1)  | 7464(2)  | 58(1)          |
| C(26) | 6936(3) | 2738(1) | 3664(3)  | 65(1)          |
| C(25) | 7756(3) | 2760(1) | 4932(3)  | 61(1)          |
| C(4)  | 6313(4) | 483(1)  | 1539(3)  | 79(1)          |
| C(28) | 8396(4) | 3230(1) | 5526(4)  | 98(1)          |
| C(3)  | 8456(3) | 747(1)  | 3290(3)  | 77(1)          |
| C(2)  | 7888(4) | -127(1) | 2941(3)  | 78(1)          |
| C(21) | -90(3)  | 1160(1) | -2266(3) | 82(1)          |

|       |         |         |         |       |
|-------|---------|---------|---------|-------|
| C(14) | 2563(4) | 2101(1) | 3141(3) | 86(1) |
| C(13) | 1161(3) | 1522(1) | 4070(3) | 83(1) |
| C(12) | 2065(4) | 2260(1) | 5320(4) | 90(1) |

---



Table 3. Bond lengths [ $\text{\AA}$ ] and angles [ $^\circ$ ] for bi155\_0m.

---

|             |            |
|-------------|------------|
| Al(1)-O(1)  | 1.7215(14) |
| Al(1)-O(2)  | 1.7277(16) |
| Al(1)-N(1)  | 1.8294(18) |
| Al(1)-N(2)  | 2.177(2)   |
| Al(1)-N(3)  | 2.406(2)   |
| N(1)-C(9)   | 1.368(3)   |
| N(1)-C(6)   | 1.373(3)   |
| N(2)-C(1)   | 1.506(3)   |
| N(2)-C(5)   | 1.496(3)   |
| N(3)-C(10)  | 1.480(3)   |
| N(3)-C(11)  | 1.494(3)   |
| O(1)-C(15)  | 1.350(2)   |
| O(2)-C(22)  | 1.349(2)   |
| C(15)-C(16) | 1.384(3)   |
| C(15)-C(20) | 1.399(3)   |
| C(6)-C(7)   | 1.368(3)   |
| C(6)-C(5)   | 1.488(4)   |
| C(20)-C(19) | 1.385(3)   |
| C(22)-C(27) | 1.377(3)   |
| C(22)-C(23) | 1.387(3)   |
| C(16)-C(17) | 1.391(3)   |
| C(11)-C(14) | 1.497(4)   |
| C(11)-C(12) | 1.509(4)   |
| C(11)-C(13) | 1.536(4)   |
| C(19)-C(18) | 1.385(4)   |
| C(18)-C(17) | 1.385(4)   |
| C(18)-C(21) | 1.522(3)   |
| C(9)-C(8)   | 1.371(3)   |
| C(9)-C(10)  | 1.473(3)   |
| C(23)-C(24) | 1.381(3)   |
| C(27)-C(26) | 1.388(3)   |
| C(24)-C(25) | 1.373(4)   |
| C(1)-C(4)   | 1.528(3)   |
| C(1)-C(2)   | 1.536(4)   |

|                   |            |
|-------------------|------------|
| C(1)-C(3)         | 1.528(4)   |
| C(8)-C(7)         | 1.401(4)   |
| C(26)-C(25)       | 1.374(4)   |
| C(25)-C(28)       | 1.519(4)   |
| O(1)-Al(1)-O(2)   | 115.12(8)  |
| O(1)-Al(1)-N(1)   | 120.15(9)  |
| O(2)-Al(1)-N(1)   | 124.35(8)  |
| O(1)-Al(1)-N(2)   | 93.88(7)   |
| O(2)-Al(1)-N(2)   | 102.38(8)  |
| N(1)-Al(1)-N(2)   | 80.49(8)   |
| O(1)-Al(1)-N(3)   | 98.39(8)   |
| O(2)-Al(1)-N(3)   | 91.68(8)   |
| N(1)-Al(1)-N(3)   | 74.84(8)   |
| N(2)-Al(1)-N(3)   | 155.33(7)  |
| C(9)-N(1)-C(6)    | 108.07(17) |
| C(9)-N(1)-Al(1)   | 128.70(15) |
| C(6)-N(1)-Al(1)   | 123.06(16) |
| C(1)-N(2)-C(5)    | 113.28(18) |
| C(1)-N(2)-Al(1)   | 123.05(14) |
| C(5)-N(2)-Al(1)   | 109.49(14) |
| C(10)-N(3)-C(11)  | 114.3(2)   |
| C(10)-N(3)-Al(1)  | 108.26(14) |
| C(11)-N(3)-Al(1)  | 128.16(14) |
| C(15)-O(1)-Al(1)  | 140.06(14) |
| C(22)-O(2)-Al(1)  | 133.33(14) |
| O(1)-C(15)-C(16)  | 122.81(18) |
| O(1)-C(15)-C(20)  | 118.7(2)   |
| C(16)-C(15)-C(20) | 118.47(18) |
| C(7)-C(6)-N(1)    | 108.6(2)   |
| C(7)-C(6)-C(5)    | 135.4(2)   |
| N(1)-C(6)-C(5)    | 115.80(18) |
| C(19)-C(20)-C(15) | 119.8(2)   |
| O(2)-C(22)-C(27)  | 120.07(18) |
| O(2)-C(22)-C(23)  | 121.99(19) |
| C(27)-C(22)-C(23) | 117.9(2)   |

|                   |            |
|-------------------|------------|
| C(15)-C(16)-C(17) | 120.7(2)   |
| C(6)-C(5)-N(2)    | 109.49(17) |
| N(3)-C(11)-C(14)  | 107.9(2)   |
| N(3)-C(11)-C(12)  | 112.8(2)   |
| C(14)-C(11)-C(12) | 112.1(3)   |
| N(3)-C(11)-C(13)  | 106.5(2)   |
| C(14)-C(11)-C(13) | 108.1(2)   |
| C(12)-C(11)-C(13) | 109.3(3)   |
| C(18)-C(19)-C(20) | 122.1(2)   |
| C(17)-C(18)-C(19) | 117.61(19) |
| C(17)-C(18)-C(21) | 120.9(2)   |
| C(19)-C(18)-C(21) | 121.5(2)   |
| N(1)-C(9)-C(8)    | 108.6(2)   |
| N(1)-C(9)-C(10)   | 117.32(18) |
| C(8)-C(9)-C(10)   | 133.9(2)   |
| C(24)-C(23)-C(22) | 120.3(2)   |
| C(22)-C(27)-C(26) | 120.8(2)   |
| C(18)-C(17)-C(16) | 121.3(2)   |
| C(25)-C(24)-C(23) | 122.0(2)   |
| C(9)-C(10)-N(3)   | 109.3(2)   |
| N(2)-C(1)-C(4)    | 106.5(2)   |
| N(2)-C(1)-C(2)    | 110.7(2)   |
| C(4)-C(1)-C(2)    | 109.6(2)   |
| N(2)-C(1)-C(3)    | 109.5(2)   |
| C(4)-C(1)-C(3)    | 110.7(3)   |
| C(2)-C(1)-C(3)    | 109.8(2)   |
| C(9)-C(8)-C(7)    | 107.3(2)   |
| C(6)-C(7)-C(8)    | 107.43(19) |
| C(25)-C(26)-C(27) | 121.3(2)   |
| C(26)-C(25)-C(24) | 117.5(2)   |
| C(26)-C(25)-C(28) | 121.0(3)   |
| C(24)-C(25)-C(28) | 121.5(2)   |

---

Symmetry transformations used to generate equivalent atoms:

Table 4. Anisotropic displacement parameters ( $\text{\AA}^2 \times 10^3$ ) for bi155\_0m. The anisotropic displacement factor exponent takes the form:  $-2\pi^2 [h^2 a^{*2} U^{11} + \dots + 2 h k a^* b^* U^{12}]$

|       | $U^{11}$ | $U^{22}$ | $U^{33}$ | $U^{23}$ | $U^{13}$ | $U^{12}$ |
|-------|----------|----------|----------|----------|----------|----------|
| Al(1) | 48(1)    | 41(1)    | 36(1)    | 6(1)     | 4(1)     | -10(1)   |
| N(1)  | 50(1)    | 40(1)    | 37(1)    | 3(1)     | 8(1)     | 0(1)     |
| N(2)  | 44(1)    | 40(1)    | 48(1)    | -1(1)    | 10(1)    | -5(1)    |
| N(3)  | 64(1)    | 52(1)    | 42(1)    | 4(1)     | 15(1)    | 10(1)    |
| O(1)  | 50(1)    | 49(1)    | 37(1)    | 2(1)     | -1(1)    | -8(1)    |
| O(2)  | 61(1)    | 42(1)    | 43(1)    | -1(1)    | 14(1)    | -13(1)   |
| C(15) | 44(1)    | 40(1)    | 38(1)    | -5(1)    | 5(1)     | 3(1)     |
| C(6)  | 45(1)    | 40(1)    | 45(1)    | 6(1)     | 1(1)     | -5(1)    |
| C(20) | 41(1)    | 44(1)    | 49(1)    | -2(1)    | 8(1)     | 1(1)     |
| C(22) | 41(1)    | 41(1)    | 43(1)    | 1(1)     | 13(1)    | -7(1)    |
| C(16) | 53(1)    | 54(1)    | 44(1)    | 0(1)     | 8(1)     | -8(1)    |
| C(5)  | 52(1)    | 45(1)    | 56(1)    | 5(1)     | 6(1)     | 5(1)     |
| C(11) | 51(1)    | 54(1)    | 49(1)    | 0(1)     | 12(1)    | 5(1)     |
| C(19) | 42(1)    | 60(2)    | 53(1)    | -10(1)   | -1(1)    | 2(1)     |
| C(18) | 55(1)    | 62(2)    | 39(1)    | -4(1)    | 1(1)     | 14(1)    |
| C(9)  | 61(1)    | 50(1)    | 36(1)    | 1(1)     | 9(1)     | -3(1)    |
| C(23) | 55(1)    | 52(1)    | 45(1)    | 7(1)     | 4(1)     | -4(1)    |
| C(27) | 63(1)    | 53(1)    | 46(1)    | 11(1)    | 4(1)     | -16(1)   |
| C(17) | 68(1)    | 60(2)    | 41(1)    | 5(1)     | 15(1)    | 3(1)     |
| C(24) | 58(1)    | 69(2)    | 50(1)    | -4(1)    | 3(1)     | -17(1)   |
| C(10) | 75(2)    | 67(2)    | 40(1)    | 1(1)     | 19(1)    | 11(1)    |
| C(1)  | 56(1)    | 57(2)    | 63(1)    | -3(1)    | 25(1)    | 1(1)     |
| C(8)  | 82(2)    | 66(2)    | 35(1)    | 5(1)     | 9(1)     | 2(1)     |
| C(7)  | 66(1)    | 56(2)    | 45(1)    | 14(1)    | -1(1)    | 0(1)     |
| C(26) | 77(2)    | 45(1)    | 70(2)    | 10(1)    | 14(1)    | -13(1)   |
| C(25) | 63(2)    | 55(2)    | 65(2)    | -12(1)   | 19(1)    | -17(1)   |
| C(4)  | 91(2)    | 102(2)   | 51(2)    | 0(1)     | 31(2)    | 15(2)    |
| C(28) | 127(3)   | 72(2)    | 95(2)    | -23(2)   | 23(2)    | -46(2)   |
| C(3)  | 60(2)    | 74(2)    | 108(2)   | 2(2)     | 40(2)    | -9(1)    |
| C(2)  | 83(2)    | 66(2)    | 93(2)    | -8(2)    | 37(2)    | 14(2)    |
| C(21) | 78(2)    | 106(3)   | 50(1)    | 5(1)     | -9(1)    | 14(2)    |

|       |        |        |       |        |       |       |
|-------|--------|--------|-------|--------|-------|-------|
| C(14) | 95(2)  | 93(2)  | 74(2) | 32(2)  | 25(2) | 33(2) |
| C(13) | 59(2)  | 104(3) | 85(2) | -12(2) | 13(2) | -9(2) |
| C(12) | 105(3) | 72(2)  | 92(2) | -7(2)  | 24(2) | 23(2) |

---

Table 5. Hydrogen coordinates ( $\times 10^4$ ) and isotropic displacement parameters ( $\text{\AA}^2 \times 10^{-3}$ ) for bi155\_0m.

|        | x     | y    | z     | U(eq) |
|--------|-------|------|-------|-------|
| H(2D)  | 5606  | 176  | 3531  | 53    |
| H(3D)  | 4399  | 1855 | 5142  | 63    |
| H(20)  | 1092  | 412  | 1717  | 55    |
| H(16)  | 3958  | 1378 | 1013  | 61    |
| H(5A)  | 6889  | -103 | 5252  | 62    |
| H(5B)  | 8013  | 331  | 5411  | 62    |
| H(19)  | -357  | 555  | -362  | 65    |
| H(23)  | 7520  | 1630 | 5637  | 63    |
| H(27)  | 5796  | 2304 | 2232  | 67    |
| H(17)  | 2470  | 1522 | -1055 | 67    |
| H(24)  | 8529  | 2347 | 6517  | 73    |
| H(10A) | 4130  | 1714 | 6962  | 72    |
| H(10B) | 2891  | 1327 | 6429  | 72    |
| H(8)   | 5421  | 884  | 8649  | 74    |
| H(7)   | 6971  | 232  | 8049  | 70    |
| H(26)  | 6781  | 3022 | 3149  | 78    |
| H(4A)  | 6048  | 822  | 1473  | 118   |
| H(4B)  | 5443  | 286  | 1382  | 118   |
| H(4C)  | 6849  | 406  | 883   | 118   |
| H(28A) | 9422  | 3187 | 5928  | 148   |
| H(28B) | 7909  | 3333 | 6196  | 148   |
| H(28C) | 8272  | 3474 | 4838  | 148   |
| H(3A)  | 9067  | 666  | 4155  | 116   |
| H(3B)  | 8043  | 1067 | 3322  | 116   |
| H(3C)  | 9033  | 744  | 2640  | 116   |
| H(2A)  | 7116  | -365 | 2824  | 117   |
| H(2B)  | 8574  | -179 | 3787  | 117   |
| H(2C)  | 8382  | -160 | 2234  | 117   |
| H(21A) | -1093 | 1138 | -2216 | 124   |
| H(21B) | 88    | 926  | -2903 | 124   |

|        |      |      |       |     |
|--------|------|------|-------|-----|
| H(21C) | 103  | 1483 | -2543 | 124 |
| H(14A) | 2770 | 1847 | 2571  | 130 |
| H(14B) | 3356 | 2332 | 3327  | 130 |
| H(14C) | 1673 | 2265 | 2702  | 130 |
| H(13A) | 1087 | 1357 | 4873  | 125 |
| H(13B) | 1351 | 1288 | 3440  | 125 |
| H(13C) | 259  | 1689 | 3689  | 125 |
| H(12A) | 2852 | 2493 | 5535  | 134 |
| H(12B) | 1957 | 2105 | 6126  | 134 |
| H(12C) | 1171 | 2426 | 4898  | 134 |

---





Table 1. Crystal data and structure refinement for compound 8—ccdc-936570.

|                                   |                                                   |                  |
|-----------------------------------|---------------------------------------------------|------------------|
| Identification code               | compound 8—ccdc-936570                            |                  |
| Empirical formula                 | C <sub>20</sub> H <sub>42</sub> Al N <sub>5</sub> |                  |
| Formula weight                    | 379.57                                            |                  |
| Temperature                       | 150(2) K                                          |                  |
| Wavelength                        | 0.71073 Å                                         |                  |
| Crystal system                    | Monoclinic                                        |                  |
| Space group                       | P 2 <sub>1</sub> /c                               |                  |
| Unit cell dimensions              | a = 33.541(4) Å                                   | α = 90°.         |
|                                   | b = 10.5578(13) Å                                 | β = 102.422(8)°. |
|                                   | c = 28.080(4) Å                                   | γ = 90°.         |
| Volume                            | 9711(2) Å <sup>3</sup>                            |                  |
| Z                                 | 16                                                |                  |
| Density (calculated)              | 1.038 Mg/m <sup>3</sup>                           |                  |
| Absorption coefficient            | 0.096 mm <sup>-1</sup>                            |                  |
| F(000)                            | 3264                                              |                  |
| Crystal size                      | 0.25 x 0.20 x 0.20 mm <sup>3</sup>                |                  |
| Theta range for data collection   | 1.87 to 28.76°.                                   |                  |
| Index ranges                      | -45 ≤ h ≤ 45, -14 ≤ k ≤ 14, -37 ≤ l ≤ 28          |                  |
| Reflections collected             | 136674                                            |                  |
| Independent reflections           | 25097 [R(int) = 0.2407]                           |                  |
| Completeness to theta = 28.76°    | 99.4 %                                            |                  |
| Absorption correction             | Semi-empirical from equivalents                   |                  |
| Max. and min. transmission        | 0.927 and 0.913                                   |                  |
| Refinement method                 | Full-matrix least-squares on F <sup>2</sup>       |                  |
| Data / restraints / parameters    | 25097 / 0 / 981                                   |                  |
| Goodness-of-fit on F <sup>2</sup> | 0.876                                             |                  |
| Final R indices [I > 2σ(I)]       | R1 = 0.0711, wR2 = 0.1619                         |                  |
| R indices (all data)              | R1 = 0.1817, wR2 = 0.2140                         |                  |
| Largest diff. peak and hole       | 0.675 and -0.537 e.Å <sup>-3</sup>                |                  |

Table 2. Atomic coordinates ( $\times 10^4$ ) and equivalent isotropic displacement parameters ( $\text{\AA}^2 \times 10^3$ ) for pei368\_0m.  $U(\text{eq})$  is defined as one third of the trace of the orthogonalized  $U^{ij}$  tensor.

|       | x       | y        | z       | $U(\text{eq})$ |
|-------|---------|----------|---------|----------------|
| Al(1) | 3758(1) | 6947(1)  | 3016(1) | 27(1)          |
| Al(4) | 3836(1) | 8157(1)  | 603(1)  | 28(1)          |
| Al(2) | 1222(1) | 1837(1)  | 1226(1) | 27(1)          |
| Al(3) | 1188(1) | 1902(1)  | 8684(1) | 26(1)          |
| N(1)  | 3682(1) | 5815(2)  | 3499(1) | 30(1)          |
| N(4)  | 3327(1) | 7701(2)  | 2631(1) | 31(1)          |
| N(5)  | 3884(1) | 5754(2)  | 2523(1) | 32(1)          |
| N(2)  | 4164(1) | 7722(2)  | 3447(1) | 33(1)          |
| N(3)  | 3320(1) | 3701(2)  | 2740(1) | 40(1)          |
| N(6)  | 1426(1) | 3155(2)  | 1651(1) | 30(1)          |
| N(20) | 4294(1) | 7969(2)  | 380(1)  | 33(1)          |
| N(11) | 1246(1) | 724(2)   | 9187(1) | 26(1)          |
| N(14) | 1632(1) | 2605(2)  | 8532(1) | 31(1)          |
| N(10) | 1616(1) | 1820(2)  | 790(1)  | 33(1)          |
| N(15) | 1047(1) | 792(2)   | 8106(1) | 30(1)          |
| N(7)  | 1301(1) | 735(2)   | 1732(1) | 31(1)          |
| N(17) | 3720(1) | 9291(2)  | 1038(1) | 32(1)          |
| N(16) | 3640(1) | 6845(2)  | 934(1)  | 33(1)          |
| N(13) | 1539(1) | -1412(2) | 8589(1) | 35(1)          |
| N(19) | 3464(1) | 8057(2)  | -48(1)  | 35(1)          |
| N(12) | 797(1)  | 2713(2)  | 8921(1) | 31(1)          |
| N(9)  | 774(1)  | 2079(2)  | 758(1)  | 32(1)          |
| N(8)  | 1678(1) | 4804(3)  | 821(1)  | 45(1)          |
| N(18) | 3475(1) | 5108(3)  | -6(1)   | 55(1)          |
| C(6)  | 3973(1) | 5990(3)  | 3918(1) | 34(1)          |
| C(13) | 2987(1) | 8461(3)  | 2732(1) | 37(1)          |
| C(9)  | 3478(1) | 4707(3)  | 3551(1) | 36(1)          |
| C(5)  | 4253(1) | 7113(3)  | 3927(1) | 40(1)          |
| C(8)  | 3638(1) | 4201(3)  | 4000(1) | 45(1)          |
| C(17) | 4295(1) | 5202(3)  | 2505(1) | 39(1)          |
| C(1)  | 4397(1) | 8895(3)  | 3416(1) | 44(1)          |

|       |         |          |         |       |
|-------|---------|----------|---------|-------|
| C(10) | 3154(1) | 4237(3)  | 3146(1) | 41(1) |
| C(15) | 2881(1) | 9518(3)  | 2358(2) | 50(1) |
| C(18) | 4489(1) | 4710(3)  | 3007(2) | 52(1) |
| C(11) | 3526(1) | 2500(3)  | 2892(2) | 62(1) |
| C(4)  | 4275(1) | 9397(3)  | 2900(1) | 50(1) |
| C(2)  | 4292(1) | 9920(3)  | 3761(2) | 55(1) |
| C(7)  | 3956(1) | 5019(3)  | 4239(1) | 43(1) |
| C(14) | 3114(1) | 9026(4)  | 3237(2) | 62(1) |
| C(19) | 4229(1) | 4129(4)  | 2131(2) | 57(1) |
| C(20) | 4552(1) | 6245(4)  | 2348(2) | 59(1) |
| C(3)  | 4856(1) | 8655(4)  | 3543(2) | 58(1) |
| C(12) | 2988(1) | 3507(4)  | 2314(2) | 62(1) |
| C(16) | 2611(1) | 7631(4)  | 2708(2) | 72(1) |
| C(26) | 1580(1) | 2703(3)  | 2109(1) | 32(1) |
| C(25) | 1505(1) | 1321(3)  | 2193(1) | 39(1) |
| C(27) | 1791(1) | 3651(3)  | 2391(1) | 40(1) |
| C(30) | 1428(1) | 5136(3)  | 1177(1) | 41(1) |
| C(28) | 1765(1) | 4739(3)  | 2089(1) | 39(1) |
| C(29) | 1542(1) | 4407(3)  | 1642(1) | 36(1) |
| C(21) | 1148(1) | -560(3)  | 1774(1) | 37(1) |
| C(24) | 996(1)  | -1083(3) | 1260(1) | 48(1) |
| C(23) | 791(1)  | -580(3)  | 2032(2) | 54(1) |
| C(22) | 1483(1) | -1442(3) | 2050(2) | 54(1) |
| C(31) | 2087(1) | 5335(4)  | 976(2)  | 66(1) |
| C(32) | 1480(2) | 5292(4)  | 343(2)  | 76(1) |
| C(34) | 337(1)  | 2777(3)  | 1286(1) | 45(1) |
| C(37) | 2048(1) | 1302(3)  | 903(1)  | 41(1) |
| C(38) | 2274(1) | 1868(3)  | 1380(1) | 49(1) |
| C(33) | 354(1)  | 2439(3)  | 770(1)  | 38(1) |
| C(39) | 2027(1) | -138(3)  | 940(2)  | 57(1) |
| C(36) | 227(1)  | 3582(4)  | 436(2)  | 57(1) |
| C(40) | 2247(1) | 1669(4)  | 481(2)  | 66(1) |
| C(35) | 62(1)   | 1337(4)  | 591(2)  | 71(1) |
| C(46) | 975(1)  | 957(3)   | 9479(1) | 29(1) |
| C(53) | 1989(1) | 3246(3)  | 8825(1) | 31(1) |
| C(48) | 1298(1) | -851(3)  | 9732(1) | 37(1) |

|       |         |          |         |        |
|-------|---------|----------|---------|--------|
| C(49) | 1442(1) | -399(2)  | 9344(1) | 31(1)  |
| C(41) | 583(1)  | 3933(3)  | 8791(1) | 34(1)  |
| C(47) | 1000(1) | 13(3)    | 9822(1) | 36(1)  |
| C(42) | 720(1)  | 4935(3)  | 9188(1) | 40(1)  |
| C(50) | 1737(1) | -948(3)  | 9077(1) | 32(1)  |
| C(44) | 698(1)  | 4424(3)  | 8328(1) | 42(1)  |
| C(43) | 120(1)  | 3768(3)  | 8703(1) | 45(1)  |
| C(45) | 708(1)  | 2108(3)  | 9354(1) | 40(1)  |
| C(52) | 1845(1) | -1691(3) | 8302(1) | 50(1)  |
| C(54) | 1893(1) | 3711(6)  | 9289(2) | 105(2) |
| C(51) | 1302(1) | -2550(3) | 8637(2) | 56(1)  |
| C(55) | 2090(2) | 4399(4)  | 8561(2) | 105(2) |
| C(56) | 2348(1) | 2390(5)  | 8916(3) | 139(3) |
| C(57) | 633(1)  | 304(3)   | 7852(1) | 40(1)  |
| C(60) | 691(1)  | -717(4)  | 7491(2) | 60(1)  |
| C(59) | 426(1)  | -236(4)  | 8241(2) | 54(1)  |
| C(58) | 384(1)  | 1398(3)  | 7590(2) | 57(1)  |
| C(66) | 3439(1) | 7326(3)  | 1270(1) | 35(1)  |
| C(67) | 3209(1) | 6388(3)  | 1421(1) | 42(1)  |
| C(65) | 3497(1) | 8730(3)  | 1382(1) | 40(1)  |
| C(63) | 4228(1) | 10595(3) | 1603(2) | 53(1)  |
| C(68) | 3272(1) | 5274(3)  | 1161(1) | 45(1)  |
| C(70) | 3691(1) | 4830(3)  | 500(2)  | 51(1)  |
| C(61) | 3872(1) | 10586(3) | 1162(1) | 40(1)  |
| C(69) | 3534(1) | 5583(3)  | 865(1)  | 39(1)  |
| C(64) | 4021(1) | 11120(3) | 725(2)  | 53(1)  |
| C(62) | 3531(1) | 11454(3) | 1263(2) | 56(1)  |
| C(71) | 3076(1) | 4490(5)  | -98(2)  | 87(2)  |
| C(72) | 3711(2) | 4644(5)  | -350(2) | 91(2)  |
| C(73) | 3028(1) | 8514(4)  | -192(1) | 52(1)  |
| C(76) | 3021(1) | 9943(4)  | -120(2) | 71(1)  |
| C(75) | 2872(1) | 8181(5)  | -724(2) | 68(1)  |
| C(74) | 2780(1) | 7842(5)  | 135(2)  | 72(1)  |
| C(78) | 4726(1) | 7244(3)  | 1131(1) | 46(1)  |
| C(77) | 4718(1) | 7684(3)  | 615(1)  | 42(1)  |
| C(80) | 4877(1) | 6633(5)  | 330(2)  | 83(2)  |

C(79)

4985(1)

8873(5)

638(2)

87(2)

---

Table 3. Bond lengths [ $\text{\AA}$ ] and angles [ $^\circ$ ] for pei368\_0m.

---

|             |          |
|-------------|----------|
| Al(1)-N(4)  | 1.793(2) |
| Al(1)-N(2)  | 1.813(3) |
| Al(1)-N(1)  | 1.867(3) |
| Al(1)-N(5)  | 1.984(3) |
| Al(4)-N(20) | 1.792(2) |
| Al(4)-N(17) | 1.811(3) |
| Al(4)-N(16) | 1.864(3) |
| Al(4)-N(19) | 1.983(3) |
| Al(2)-N(9)  | 1.788(3) |
| Al(2)-N(7)  | 1.811(3) |
| Al(2)-N(6)  | 1.866(3) |
| Al(2)-N(10) | 1.984(3) |
| Al(3)-N(14) | 1.795(2) |
| Al(3)-N(12) | 1.809(2) |
| Al(3)-N(11) | 1.863(3) |
| Al(3)-N(15) | 1.975(3) |
| N(1)-C(6)   | 1.372(4) |
| N(1)-C(9)   | 1.378(3) |
| N(4)-C(13)  | 1.472(4) |
| N(5)-C(17)  | 1.507(4) |
| N(2)-C(5)   | 1.465(4) |
| N(2)-C(1)   | 1.477(4) |
| N(3)-C(12)  | 1.462(4) |
| N(3)-C(11)  | 1.465(4) |
| N(3)-C(10)  | 1.484(4) |
| N(6)-C(26)  | 1.365(4) |
| N(6)-C(29)  | 1.379(4) |
| N(20)-C(77) | 1.465(4) |
| N(11)-C(46) | 1.370(4) |
| N(11)-C(49) | 1.379(3) |
| N(14)-C(53) | 1.464(4) |
| N(10)-C(37) | 1.517(3) |
| N(15)-C(57) | 1.509(4) |
| N(7)-C(25)  | 1.466(4) |

|             |          |
|-------------|----------|
| N(7)-C(21)  | 1.475(4) |
| N(17)-C(65) | 1.468(4) |
| N(17)-C(61) | 1.474(4) |
| N(16)-C(66) | 1.371(4) |
| N(16)-C(69) | 1.382(4) |
| N(13)-C(51) | 1.463(4) |
| N(13)-C(52) | 1.464(4) |
| N(13)-C(50) | 1.474(4) |
| N(19)-C(73) | 1.510(4) |
| N(12)-C(45) | 1.460(4) |
| N(12)-C(41) | 1.480(3) |
| N(9)-C(33)  | 1.468(3) |
| N(8)-C(32)  | 1.458(5) |
| N(8)-C(31)  | 1.461(4) |
| N(8)-C(30)  | 1.477(4) |
| N(18)-C(72) | 1.458(5) |
| N(18)-C(71) | 1.463(5) |
| N(18)-C(70) | 1.478(5) |
| C(6)-C(7)   | 1.373(4) |
| C(6)-C(5)   | 1.509(4) |
| C(13)-C(14) | 1.513(5) |
| C(13)-C(15) | 1.519(4) |
| C(13)-C(16) | 1.525(4) |
| C(9)-C(8)   | 1.368(5) |
| C(9)-C(10)  | 1.481(5) |
| C(8)-C(7)   | 1.425(5) |
| C(17)-C(18) | 1.513(5) |
| C(17)-C(20) | 1.520(5) |
| C(17)-C(19) | 1.528(5) |
| C(1)-C(4)   | 1.515(5) |
| C(1)-C(3)   | 1.526(5) |
| C(1)-C(2)   | 1.543(5) |
| C(26)-C(27) | 1.373(4) |
| C(26)-C(25) | 1.508(4) |
| C(27)-C(28) | 1.420(5) |
| C(30)-C(29) | 1.493(5) |

|             |          |
|-------------|----------|
| C(28)-C(29) | 1.361(5) |
| C(21)-C(24) | 1.525(5) |
| C(21)-C(23) | 1.526(5) |
| C(21)-C(22) | 1.537(4) |
| C(34)-C(33) | 1.506(5) |
| C(37)-C(38) | 1.513(5) |
| C(37)-C(39) | 1.526(5) |
| C(37)-C(40) | 1.530(5) |
| C(33)-C(36) | 1.531(5) |
| C(33)-C(35) | 1.534(5) |
| C(46)-C(47) | 1.375(4) |
| C(46)-C(45) | 1.506(4) |
| C(53)-C(56) | 1.481(5) |
| C(53)-C(54) | 1.492(5) |
| C(53)-C(55) | 1.502(5) |
| C(48)-C(49) | 1.369(4) |
| C(48)-C(47) | 1.414(4) |
| C(49)-C(50) | 1.483(4) |
| C(41)-C(44) | 1.526(5) |
| C(41)-C(43) | 1.531(4) |
| C(41)-C(42) | 1.532(4) |
| C(57)-C(58) | 1.518(4) |
| C(57)-C(60) | 1.520(5) |
| C(57)-C(59) | 1.527(5) |
| C(66)-C(67) | 1.377(4) |
| C(66)-C(65) | 1.518(4) |
| C(67)-C(68) | 1.424(5) |
| C(63)-C(61) | 1.527(5) |
| C(68)-C(69) | 1.372(5) |
| C(70)-C(69) | 1.481(5) |
| C(61)-C(64) | 1.530(5) |
| C(61)-C(62) | 1.538(4) |
| C(73)-C(75) | 1.515(5) |
| C(73)-C(76) | 1.523(5) |
| C(73)-C(74) | 1.536(5) |
| C(78)-C(77) | 1.518(5) |



|                   |            |
|-------------------|------------|
| C(77)-C(80)       | 1.529(5)   |
| C(77)-C(79)       | 1.534(5)   |
| N(4)-Al(1)-N(2)   | 126.53(12) |
| N(4)-Al(1)-N(1)   | 120.27(11) |
| N(2)-Al(1)-N(1)   | 90.18(12)  |
| N(4)-Al(1)-N(5)   | 97.30(12)  |
| N(2)-Al(1)-N(5)   | 120.66(11) |
| N(1)-Al(1)-N(5)   | 100.58(11) |
| N(20)-Al(4)-N(17) | 129.27(12) |
| N(20)-Al(4)-N(16) | 120.83(11) |
| N(17)-Al(4)-N(16) | 90.36(12)  |
| N(20)-Al(4)-N(19) | 95.10(12)  |
| N(17)-Al(4)-N(19) | 118.30(11) |
| N(16)-Al(4)-N(19) | 101.56(12) |
| N(9)-Al(2)-N(7)   | 128.70(12) |
| N(9)-Al(2)-N(6)   | 119.85(11) |
| N(7)-Al(2)-N(6)   | 90.28(12)  |
| N(9)-Al(2)-N(10)  | 96.55(12)  |
| N(7)-Al(2)-N(10)  | 118.31(11) |
| N(6)-Al(2)-N(10)  | 101.62(11) |
| N(14)-Al(3)-N(12) | 126.57(12) |
| N(14)-Al(3)-N(11) | 119.92(11) |
| N(12)-Al(3)-N(11) | 90.17(11)  |
| N(14)-Al(3)-N(15) | 96.61(11)  |
| N(12)-Al(3)-N(15) | 121.25(11) |
| N(11)-Al(3)-N(15) | 101.24(11) |
| C(6)-N(1)-C(9)    | 107.5(3)   |
| C(6)-N(1)-Al(1)   | 110.79(19) |
| C(9)-N(1)-Al(1)   | 140.3(2)   |
| C(13)-N(4)-Al(1)  | 133.1(2)   |
| C(17)-N(5)-Al(1)  | 127.13(19) |
| C(5)-N(2)-C(1)    | 114.7(2)   |
| C(5)-N(2)-Al(1)   | 113.09(18) |
| C(1)-N(2)-Al(1)   | 132.0(2)   |
| C(12)-N(3)-C(11)  | 110.3(3)   |

|                   |            |
|-------------------|------------|
| C(12)-N(3)-C(10)  | 109.6(3)   |
| C(11)-N(3)-C(10)  | 109.7(3)   |
| C(26)-N(6)-C(29)  | 107.6(3)   |
| C(26)-N(6)-Al(2)  | 110.80(19) |
| C(29)-N(6)-Al(2)  | 140.2(2)   |
| C(77)-N(20)-Al(4) | 133.6(2)   |
| C(46)-N(11)-C(49) | 107.2(2)   |
| C(46)-N(11)-Al(3) | 111.02(18) |
| C(49)-N(11)-Al(3) | 141.3(2)   |
| C(53)-N(14)-Al(3) | 132.7(2)   |
| C(37)-N(10)-Al(2) | 127.4(2)   |
| C(57)-N(15)-Al(3) | 128.6(2)   |
| C(25)-N(7)-C(21)  | 115.1(2)   |
| C(25)-N(7)-Al(2)  | 112.60(18) |
| C(21)-N(7)-Al(2)  | 131.6(2)   |
| C(65)-N(17)-C(61) | 114.7(3)   |
| C(65)-N(17)-Al(4) | 112.97(19) |
| C(61)-N(17)-Al(4) | 131.3(2)   |
| C(66)-N(16)-C(69) | 107.7(3)   |
| C(66)-N(16)-Al(4) | 110.19(19) |
| C(69)-N(16)-Al(4) | 139.0(2)   |
| C(51)-N(13)-C(52) | 110.2(3)   |
| C(51)-N(13)-C(50) | 109.4(3)   |
| C(52)-N(13)-C(50) | 110.5(2)   |
| C(73)-N(19)-Al(4) | 127.6(2)   |
| C(45)-N(12)-C(41) | 114.2(2)   |
| C(45)-N(12)-Al(3) | 113.15(18) |
| C(41)-N(12)-Al(3) | 132.2(2)   |
| C(33)-N(9)-Al(2)  | 132.8(2)   |
| C(32)-N(8)-C(31)  | 110.6(3)   |
| C(32)-N(8)-C(30)  | 109.0(3)   |
| C(31)-N(8)-C(30)  | 110.0(3)   |
| C(72)-N(18)-C(71) | 109.9(3)   |
| C(72)-N(18)-C(70) | 110.2(4)   |
| C(71)-N(18)-C(70) | 108.8(3)   |
| N(1)-C(6)-C(7)    | 109.9(3)   |

|                   |          |
|-------------------|----------|
| N(1)-C(6)-C(5)    | 116.5(3) |
| C(7)-C(6)-C(5)    | 133.5(3) |
| N(4)-C(13)-C(14)  | 108.8(3) |
| N(4)-C(13)-C(15)  | 110.2(3) |
| C(14)-C(13)-C(15) | 109.5(3) |
| N(4)-C(13)-C(16)  | 110.2(3) |
| C(14)-C(13)-C(16) | 109.3(3) |
| C(15)-C(13)-C(16) | 108.8(3) |
| C(8)-C(9)-N(1)    | 109.0(3) |
| C(8)-C(9)-C(10)   | 130.9(3) |
| N(1)-C(9)-C(10)   | 120.1(3) |
| N(2)-C(5)-C(6)    | 109.1(3) |
| C(9)-C(8)-C(7)    | 107.6(3) |
| N(5)-C(17)-C(18)  | 108.3(3) |
| N(5)-C(17)-C(20)  | 108.0(3) |
| C(18)-C(17)-C(20) | 111.2(3) |
| N(5)-C(17)-C(19)  | 108.1(2) |
| C(18)-C(17)-C(19) | 110.8(3) |
| C(20)-C(17)-C(19) | 110.3(3) |
| N(2)-C(1)-C(4)    | 108.3(3) |
| N(2)-C(1)-C(3)    | 111.5(3) |
| C(4)-C(1)-C(3)    | 109.4(3) |
| N(2)-C(1)-C(2)    | 110.8(3) |
| C(4)-C(1)-C(2)    | 107.7(3) |
| C(3)-C(1)-C(2)    | 109.0(3) |
| C(9)-C(10)-N(3)   | 112.6(3) |
| C(6)-C(7)-C(8)    | 106.0(3) |
| N(6)-C(26)-C(27)  | 109.4(3) |
| N(6)-C(26)-C(25)  | 116.3(3) |
| C(27)-C(26)-C(25) | 134.3(3) |
| N(7)-C(25)-C(26)  | 109.4(3) |
| C(26)-C(27)-C(28) | 106.7(3) |
| N(8)-C(30)-C(29)  | 113.2(3) |
| C(29)-C(28)-C(27) | 107.1(3) |
| C(28)-C(29)-N(6)  | 109.3(3) |
| C(28)-C(29)-C(30) | 131.3(3) |

|                   |          |
|-------------------|----------|
| N(6)-C(29)-C(30)  | 119.4(3) |
| N(7)-C(21)-C(24)  | 108.1(3) |
| N(7)-C(21)-C(23)  | 111.9(2) |
| C(24)-C(21)-C(23) | 108.0(3) |
| N(7)-C(21)-C(22)  | 111.9(3) |
| C(24)-C(21)-C(22) | 108.4(3) |
| C(23)-C(21)-C(22) | 108.4(3) |
| C(38)-C(37)-N(10) | 108.4(3) |
| C(38)-C(37)-C(39) | 110.7(3) |
| N(10)-C(37)-C(39) | 108.6(3) |
| C(38)-C(37)-C(40) | 111.5(3) |
| N(10)-C(37)-C(40) | 107.7(3) |
| C(39)-C(37)-C(40) | 109.9(3) |
| N(9)-C(33)-C(34)  | 108.6(3) |
| N(9)-C(33)-C(36)  | 109.5(3) |
| C(34)-C(33)-C(36) | 109.8(3) |
| N(9)-C(33)-C(35)  | 110.2(3) |
| C(34)-C(33)-C(35) | 109.9(3) |
| C(36)-C(33)-C(35) | 108.9(3) |
| N(11)-C(46)-C(47) | 109.9(2) |
| N(11)-C(46)-C(45) | 116.3(3) |
| C(47)-C(46)-C(45) | 133.7(3) |
| N(14)-C(53)-C(56) | 110.5(3) |
| N(14)-C(53)-C(54) | 109.8(3) |
| C(56)-C(53)-C(54) | 111.8(4) |
| N(14)-C(53)-C(55) | 110.0(3) |
| C(56)-C(53)-C(55) | 108.5(4) |
| C(54)-C(53)-C(55) | 106.2(4) |
| C(49)-C(48)-C(47) | 107.5(3) |
| C(48)-C(49)-N(11) | 109.1(3) |
| C(48)-C(49)-C(50) | 130.9(3) |
| N(11)-C(49)-C(50) | 119.9(3) |
| N(12)-C(41)-C(44) | 107.9(2) |
| N(12)-C(41)-C(43) | 111.2(2) |
| C(44)-C(41)-C(43) | 109.4(3) |
| N(12)-C(41)-C(42) | 111.7(3) |

|                   |          |
|-------------------|----------|
| C(44)-C(41)-C(42) | 107.1(3) |
| C(43)-C(41)-C(42) | 109.3(3) |
| C(46)-C(47)-C(48) | 106.3(3) |
| N(13)-C(50)-C(49) | 112.5(2) |
| N(12)-C(45)-C(46) | 109.3(2) |
| N(15)-C(57)-C(58) | 108.9(3) |
| N(15)-C(57)-C(60) | 108.7(3) |
| C(58)-C(57)-C(60) | 110.7(3) |
| N(15)-C(57)-C(59) | 107.6(3) |
| C(58)-C(57)-C(59) | 110.1(3) |
| C(60)-C(57)-C(59) | 110.8(3) |
| N(16)-C(66)-C(67) | 109.6(3) |
| N(16)-C(66)-C(65) | 116.4(3) |
| C(67)-C(66)-C(65) | 133.9(3) |
| C(66)-C(67)-C(68) | 106.3(3) |
| N(17)-C(65)-C(66) | 108.6(3) |
| C(69)-C(68)-C(67) | 107.5(3) |
| N(18)-C(70)-C(69) | 112.7(3) |
| N(17)-C(61)-C(63) | 111.5(3) |
| N(17)-C(61)-C(64) | 107.9(3) |
| C(63)-C(61)-C(64) | 108.3(3) |
| N(17)-C(61)-C(62) | 111.4(3) |
| C(63)-C(61)-C(62) | 109.3(3) |
| C(64)-C(61)-C(62) | 108.3(3) |
| C(68)-C(69)-N(16) | 108.8(3) |
| C(68)-C(69)-C(70) | 131.4(3) |
| N(16)-C(69)-C(70) | 119.7(3) |
| N(19)-C(73)-C(75) | 107.2(3) |
| N(19)-C(73)-C(76) | 108.7(3) |
| C(75)-C(73)-C(76) | 110.4(4) |
| N(19)-C(73)-C(74) | 108.0(3) |
| C(75)-C(73)-C(74) | 111.5(3) |
| C(76)-C(73)-C(74) | 110.8(3) |
| N(20)-C(77)-C(78) | 107.8(2) |
| N(20)-C(77)-C(80) | 109.2(3) |
| C(78)-C(77)-C(80) | 110.0(3) |

|                   |          |
|-------------------|----------|
| N(20)-C(77)-C(79) | 110.6(3) |
| C(78)-C(77)-C(79) | 108.7(3) |
| C(80)-C(77)-C(79) | 110.6(4) |

---

Symmetry transformations used to generate equivalent atoms:

Table 4. Anisotropic displacement parameters ( $\text{\AA}^2 \times 10^3$ ) for pei368\_0m. The anisotropic displacement factor exponent takes the form:  $-2\pi^2 [ h^2 a^{*2} U^{11} + \dots + 2 h k a^* b^* U^{12} ]$

|       | $U^{11}$ | $U^{22}$ | $U^{33}$ | $U^{23}$ | $U^{13}$ | $U^{12}$ |
|-------|----------|----------|----------|----------|----------|----------|
| Al(1) | 28(1)    | 27(1)    | 26(1)    | -2(1)    | 7(1)     | -4(1)    |
| Al(4) | 27(1)    | 31(1)    | 26(1)    | 1(1)     | 5(1)     | 2(1)     |
| Al(2) | 29(1)    | 26(1)    | 26(1)    | -1(1)    | 5(1)     | 4(1)     |
| Al(3) | 26(1)    | 27(1)    | 25(1)    | 1(1)     | 5(1)     | 4(1)     |
| N(1)  | 33(1)    | 29(1)    | 28(2)    | 0(1)     | 5(1)     | -2(1)    |
| N(4)  | 34(1)    | 35(1)    | 26(2)    | 0(1)     | 9(1)     | 2(1)     |
| N(5)  | 32(1)    | 35(1)    | 29(2)    | 0(1)     | 5(1)     | -1(1)    |
| N(2)  | 34(1)    | 38(1)    | 28(2)    | -1(1)    | 6(1)     | -9(1)    |
| N(3)  | 48(2)    | 33(1)    | 39(2)    | -9(1)    | 6(1)     | -6(1)    |
| N(6)  | 35(1)    | 29(1)    | 26(2)    | 2(1)     | 5(1)     | 1(1)     |
| N(20) | 30(1)    | 43(1)    | 26(2)    | 6(1)     | 3(1)     | 6(1)     |
| N(11) | 28(1)    | 26(1)    | 24(2)    | 0(1)     | 5(1)     | 4(1)     |
| N(14) | 34(1)    | 33(1)    | 25(2)    | -3(1)    | 6(1)     | -2(1)    |
| N(10) | 29(1)    | 40(1)    | 28(2)    | -2(1)    | 5(1)     | 5(1)     |
| N(15) | 30(1)    | 33(1)    | 27(2)    | 3(1)     | 4(1)     | 2(1)     |
| N(7)  | 37(1)    | 25(1)    | 30(2)    | 0(1)     | 4(1)     | 1(1)     |
| N(17) | 38(1)    | 31(1)    | 30(2)    | -2(1)    | 10(1)    | -2(1)    |
| N(16) | 36(1)    | 34(1)    | 31(2)    | -2(1)    | 10(1)    | -1(1)    |
| N(13) | 41(1)    | 29(1)    | 35(2)    | -7(1)    | 7(1)     | 3(1)     |
| N(19) | 26(1)    | 47(2)    | 30(2)    | -2(1)    | 3(1)     | 5(1)     |
| N(12) | 37(1)    | 33(1)    | 26(2)    | 8(1)     | 12(1)    | 9(1)     |
| N(9)  | 31(1)    | 36(1)    | 29(2)    | -4(1)    | 7(1)     | 7(1)     |
| N(8)  | 60(2)    | 44(2)    | 32(2)    | 7(1)     | 11(2)    | -4(1)    |
| N(18) | 75(2)    | 59(2)    | 38(2)    | -16(2)   | 25(2)    | -21(2)   |
| C(6)  | 37(2)    | 38(2)    | 27(2)    | 0(1)     | 8(1)     | 3(1)     |
| C(13) | 38(2)    | 35(2)    | 40(2)    | 3(2)     | 15(2)    | 5(1)     |
| C(9)  | 46(2)    | 28(2)    | 36(2)    | 2(1)     | 14(2)    | -2(1)    |
| C(5)  | 39(2)    | 48(2)    | 29(2)    | -3(2)    | 0(1)     | -5(1)    |
| C(8)  | 66(2)    | 28(2)    | 45(3)    | 9(2)     | 17(2)    | 0(2)     |
| C(17) | 33(2)    | 47(2)    | 38(2)    | -8(2)    | 11(2)    | 3(1)     |
| C(1)  | 46(2)    | 47(2)    | 41(3)    | -8(2)    | 14(2)    | -21(2)   |

|       |        |        |        |        |       |        |
|-------|--------|--------|--------|--------|-------|--------|
| C(10) | 42(2)  | 34(2)  | 49(3)  | 0(2)   | 13(2) | -10(1) |
| C(15) | 63(2)  | 39(2)  | 50(3)  | 8(2)   | 18(2) | 13(2)  |
| C(18) | 41(2)  | 61(2)  | 51(3)  | 0(2)   | 5(2)  | 16(2)  |
| C(11) | 78(3)  | 33(2)  | 77(4)  | -9(2)  | 19(2) | -4(2)  |
| C(4)  | 64(2)  | 41(2)  | 50(3)  | 0(2)   | 22(2) | -23(2) |
| C(2)  | 70(2)  | 46(2)  | 55(3)  | -17(2) | 24(2) | -28(2) |
| C(7)  | 56(2)  | 40(2)  | 32(2)  | 5(2)   | 6(2)  | 8(2)   |
| C(14) | 74(3)  | 72(3)  | 46(3)  | 4(2)   | 24(2) | 30(2)  |
| C(19) | 54(2)  | 60(2)  | 59(3)  | -26(2) | 16(2) | 8(2)   |
| C(20) | 53(2)  | 66(2)  | 66(3)  | -9(2)  | 33(2) | -7(2)  |
| C(3)  | 44(2)  | 73(3)  | 60(3)  | -10(2) | 13(2) | -27(2) |
| C(12) | 62(2)  | 68(2)  | 54(3)  | -13(2) | 5(2)  | -25(2) |
| C(16) | 41(2)  | 56(2)  | 126(5) | 20(3)  | 31(2) | 4(2)   |
| C(26) | 35(2)  | 35(2)  | 27(2)  | 0(1)   | 8(1)  | 0(1)   |
| C(25) | 46(2)  | 38(2)  | 32(2)  | 4(2)   | 4(2)  | -2(1)  |
| C(27) | 41(2)  | 52(2)  | 26(2)  | -7(2)  | 5(2)  | -8(2)  |
| C(30) | 54(2)  | 30(2)  | 39(2)  | 3(2)   | 7(2)  | 0(1)   |
| C(28) | 49(2)  | 36(2)  | 34(2)  | -7(2)  | 11(2) | -12(1) |
| C(29) | 44(2)  | 29(2)  | 37(2)  | -4(1)  | 10(2) | -1(1)  |
| C(21) | 49(2)  | 25(1)  | 37(2)  | 1(1)   | 8(2)  | 1(1)   |
| C(24) | 59(2)  | 30(2)  | 51(3)  | 1(2)   | 4(2)  | -1(2)  |
| C(23) | 65(2)  | 41(2)  | 59(3)  | 5(2)   | 24(2) | -6(2)  |
| C(22) | 71(2)  | 33(2)  | 53(3)  | 12(2)  | 2(2)  | 8(2)   |
| C(31) | 67(3)  | 70(3)  | 68(3)  | 7(2)   | 27(2) | -21(2) |
| C(32) | 115(4) | 72(3)  | 40(3)  | 19(2)  | 12(3) | 4(3)   |
| C(34) | 43(2)  | 57(2)  | 38(3)  | 6(2)   | 15(2) | 19(2)  |
| C(37) | 31(2)  | 56(2)  | 39(2)  | -3(2)  | 10(2) | 9(1)   |
| C(38) | 34(2)  | 60(2)  | 50(3)  | -13(2) | 1(2)  | 7(2)   |
| C(33) | 28(2)  | 50(2)  | 36(2)  | -3(2)  | 5(1)  | 9(1)   |
| C(39) | 44(2)  | 58(2)  | 63(3)  | -13(2) | 0(2)  | 21(2)  |
| C(36) | 51(2)  | 83(3)  | 40(3)  | 15(2)  | 15(2) | 34(2)  |
| C(40) | 44(2)  | 109(3) | 51(3)  | -2(3)  | 24(2) | 10(2)  |
| C(35) | 35(2)  | 89(3)  | 87(4)  | -32(3) | 10(2) | -6(2)  |
| C(46) | 31(1)  | 31(2)  | 25(2)  | -2(1)  | 6(1)  | 0(1)   |
| C(53) | 32(1)  | 30(1)  | 33(2)  | -6(1)  | 10(1) | -3(1)  |
| C(48) | 48(2)  | 29(2)  | 32(2)  | 8(1)   | 5(2)  | 3(1)   |



|       |        |        |        |        |        |        |
|-------|--------|--------|--------|--------|--------|--------|
| C(49) | 36(2)  | 25(1)  | 29(2)  | 1(1)   | 3(1)   | 1(1)   |
| C(41) | 36(2)  | 35(2)  | 31(2)  | 4(1)   | 6(1)   | 12(1)  |
| C(47) | 49(2)  | 30(2)  | 31(2)  | 1(1)   | 13(2)  | 0(1)   |
| C(42) | 44(2)  | 38(2)  | 38(2)  | -1(2)  | 8(2)   | 8(1)   |
| C(50) | 35(2)  | 24(1)  | 36(2)  | 0(1)   | 5(1)   | 5(1)   |
| C(44) | 54(2)  | 35(2)  | 35(2)  | 13(2)  | 10(2)  | 13(1)  |
| C(43) | 38(2)  | 46(2)  | 49(3)  | 3(2)   | 3(2)   | 14(1)  |
| C(45) | 41(2)  | 42(2)  | 41(2)  | 8(2)   | 17(2)  | 11(1)  |
| C(52) | 55(2)  | 52(2)  | 43(3)  | -9(2)  | 12(2)  | 14(2)  |
| C(54) | 75(3)  | 198(6) | 43(3)  | -47(4) | 18(2)  | -61(3) |
| C(51) | 70(2)  | 30(2)  | 62(3)  | -8(2)  | 2(2)   | -11(2) |
| C(55) | 121(4) | 81(3)  | 96(5)  | 18(3)  | -17(3) | -64(3) |
| C(56) | 41(2)  | 90(4)  | 250(8) | -96(4) | -44(3) | 23(2)  |
| C(57) | 34(2)  | 43(2)  | 38(2)  | -4(2)  | -3(2)  | -1(1)  |
| C(60) | 58(2)  | 63(2)  | 53(3)  | -26(2) | -6(2)  | 3(2)   |
| C(59) | 38(2)  | 67(2)  | 58(3)  | -1(2)  | 8(2)   | -16(2) |
| C(58) | 50(2)  | 67(2)  | 44(3)  | -2(2)  | -11(2) | 8(2)   |
| C(66) | 32(2)  | 41(2)  | 30(2)  | 0(2)   | 4(1)   | -3(1)  |
| C(67) | 40(2)  | 57(2)  | 29(2)  | -2(2)  | 10(2)  | -12(2) |
| C(65) | 46(2)  | 42(2)  | 36(2)  | -4(2)  | 16(2)  | 0(1)   |
| C(63) | 61(2)  | 45(2)  | 51(3)  | -7(2)  | 6(2)   | -14(2) |
| C(68) | 51(2)  | 48(2)  | 35(2)  | -3(2)  | 7(2)   | -17(2) |
| C(70) | 69(2)  | 34(2)  | 56(3)  | -7(2)  | 26(2)  | -8(2)  |
| C(61) | 49(2)  | 32(2)  | 40(2)  | -1(2)  | 13(2)  | 1(1)   |
| C(69) | 45(2)  | 35(2)  | 37(2)  | 1(2)   | 10(2)  | -3(1)  |
| C(64) | 71(2)  | 38(2)  | 53(3)  | 1(2)   | 26(2)  | -5(2)  |
| C(62) | 72(2)  | 38(2)  | 59(3)  | -8(2)  | 20(2)  | 6(2)   |
| C(71) | 95(3)  | 104(4) | 59(4)  | -25(3) | 9(3)   | -51(3) |
| C(72) | 136(4) | 88(3)  | 65(4)  | -25(3) | 57(3)  | -12(3) |
| C(73) | 27(2)  | 98(3)  | 28(2)  | 3(2)   | 3(1)   | 15(2)  |
| C(76) | 61(2)  | 99(3)  | 53(3)  | 8(2)   | 14(2)  | 48(2)  |
| C(75) | 34(2)  | 130(4) | 34(3)  | -6(2)  | -4(2)  | 15(2)  |
| C(74) | 31(2)  | 141(4) | 44(3)  | 4(3)   | 9(2)   | 6(2)   |
| C(78) | 41(2)  | 58(2)  | 33(2)  | 7(2)   | 0(2)   | 17(2)  |
| C(77) | 30(2)  | 65(2)  | 33(2)  | 14(2)  | 7(1)   | 12(2)  |
| C(80) | 62(2)  | 141(4) | 44(3)  | 8(3)   | 11(2)  | 66(3)  |

|       |       |        |       |       |       |        |
|-------|-------|--------|-------|-------|-------|--------|
| C(79) | 39(2) | 130(4) | 85(4) | 49(3) | -4(2) | -23(2) |
|-------|-------|--------|-------|-------|-------|--------|

---

Table 5. Hydrogen coordinates ( $\times 10^4$ ) and isotropic displacement parameters ( $\text{\AA}^2 \times 10^{-3}$ ) for pei368\_0m.

|        | x    | y     | z    | U(eq) |
|--------|------|-------|------|-------|
| H(4)   | 3317 | 7594  | 2318 | 37    |
| H(5A)  | 3715 | 5069  | 2525 | 39    |
| H(5B)  | 3794 | 6145  | 2226 | 39    |
| H(20)  | 4257 | 8070  | 63   | 40    |
| H(14)  | 1636 | 2555  | 8221 | 37    |
| H(10A) | 1485 | 1406  | 512  | 39    |
| H(10B) | 1640 | 2651  | 701  | 39    |
| H(15A) | 1148 | 1198  | 7867 | 36    |
| H(15B) | 1205 | 80    | 8186 | 36    |
| H(19A) | 3599 | 8458  | -258 | 42    |
| H(19B) | 3455 | 7213  | -132 | 42    |
| H(9)   | 814  | 1959  | 461  | 38    |
| H(5C)  | 4211 | 7723  | 4179 | 48    |
| H(5D)  | 4541 | 6830  | 4009 | 48    |
| H(8)   | 3552 | 3441  | 4129 | 54    |
| H(10C) | 2966 | 4942  | 3020 | 49    |
| H(10D) | 2994 | 3576  | 3271 | 49    |
| H(15C) | 3121 | 10053 | 2369 | 75    |
| H(15D) | 2659 | 10031 | 2434 | 75    |
| H(15E) | 2794 | 9151  | 2032 | 75    |
| H(18A) | 4535 | 5415  | 3239 | 78    |
| H(18B) | 4751 | 4308  | 2999 | 78    |
| H(18C) | 4308 | 4087  | 3109 | 78    |
| H(11A) | 3330 | 1897  | 2977 | 94    |
| H(11B) | 3748 | 2644  | 3177 | 94    |
| H(11C) | 3639 | 2155  | 2625 | 94    |
| H(4A)  | 4352 | 8783  | 2674 | 76    |
| H(4B)  | 4416 | 10202 | 2876 | 76    |
| H(4C)  | 3979 | 9533  | 2815 | 76    |
| H(2A)  | 3995 | 10034 | 3698 | 83    |

|        |      |       |      |     |
|--------|------|-------|------|-----|
| H(2B)  | 4422 | 10721 | 3704 | 83  |
| H(2C)  | 4392 | 9655  | 4100 | 83  |
| H(7)   | 4123 | 4915  | 4556 | 52  |
| H(14A) | 3191 | 8344  | 3476 | 93  |
| H(14B) | 2886 | 9507  | 3313 | 93  |
| H(14C) | 3348 | 9591  | 3249 | 93  |
| H(19C) | 4045 | 3495  | 2223 | 86  |
| H(19D) | 4491 | 3733  | 2122 | 86  |
| H(19E) | 4107 | 4470  | 1808 | 86  |
| H(20A) | 4405 | 6614  | 2040 | 88  |
| H(20B) | 4812 | 5890  | 2304 | 88  |
| H(20C) | 4606 | 6904  | 2600 | 88  |
| H(3A)  | 4942 | 8453  | 3890 | 87  |
| H(3B)  | 5000 | 9415  | 3470 | 87  |
| H(3C)  | 4922 | 7943  | 3349 | 87  |
| H(12A) | 3098 | 3162  | 2045 | 94  |
| H(12B) | 2853 | 4318  | 2215 | 94  |
| H(12C) | 2789 | 2910  | 2397 | 94  |
| H(16A) | 2541 | 7213  | 2389 | 108 |
| H(16B) | 2382 | 8157  | 2754 | 108 |
| H(16C) | 2670 | 6989  | 2966 | 108 |
| H(25A) | 1767 | 887   | 2322 | 47  |
| H(25B) | 1332 | 1235  | 2436 | 47  |
| H(27)  | 1927 | 3591  | 2724 | 48  |
| H(30A) | 1137 | 4975  | 1028 | 50  |
| H(30B) | 1458 | 6052  | 1251 | 50  |
| H(28)  | 1881 | 5546  | 2181 | 47  |
| H(24A) | 783  | -527  | 1078 | 72  |
| H(24B) | 885  | -1935 | 1280 | 72  |
| H(24C) | 1224 | -1124 | 1093 | 72  |
| H(23A) | 881  | -245  | 2363 | 80  |
| H(23B) | 695  | -1452 | 2047 | 80  |
| H(23C) | 568  | -55   | 1850 | 80  |
| H(22A) | 1720 | -1411 | 1897 | 81  |
| H(22B) | 1379 | -2311 | 2038 | 81  |
| H(22C) | 1565 | -1166 | 2390 | 81  |

|        |      |       |       |     |
|--------|------|-------|-------|-----|
| H(31A) | 2256 | 5067  | 750   | 99  |
| H(31B) | 2210 | 5033  | 1305  | 99  |
| H(31C) | 2071 | 6262  | 978   | 99  |
| H(32A) | 1454 | 6214  | 361   | 115 |
| H(32B) | 1209 | 4912  | 242   | 115 |
| H(32C) | 1645 | 5078  | 106   | 115 |
| H(34A) | 425  | 2049  | 1499  | 67  |
| H(34B) | 56   | 3004  | 1300  | 67  |
| H(34C) | 517  | 3498  | 1394  | 67  |
| H(38A) | 2272 | 2794  | 1354  | 73  |
| H(38B) | 2556 | 1563  | 1453  | 73  |
| H(38C) | 2139 | 1614  | 1642  | 73  |
| H(39A) | 1903 | -367  | 1213  | 85  |
| H(39B) | 2304 | -490  | 994   | 85  |
| H(39C) | 1862 | -481  | 637   | 85  |
| H(36A) | 408  | 4296  | 551   | 86  |
| H(36B) | -55  | 3817  | 442   | 86  |
| H(36C) | 245  | 3364  | 102   | 86  |
| H(40A) | 2084 | 1333  | 175   | 99  |
| H(40B) | 2523 | 1315  | 537   | 99  |
| H(40C) | 2261 | 2594  | 460   | 99  |
| H(35A) | 75   | 1123  | 255   | 106 |
| H(35B) | -217 | 1585  | 602   | 106 |
| H(35C) | 142  | 598   | 801   | 106 |
| H(48)  | 1382 | -1606 | 9908  | 44  |
| H(47)  | 848  | -46   | 10070 | 43  |
| H(42A) | 648  | 4657  | 9491  | 60  |
| H(42B) | 584  | 5740  | 9083  | 60  |
| H(42C) | 1016 | 5048  | 9242  | 60  |
| H(50A) | 1942 | -295  | 9044  | 38  |
| H(50B) | 1884 | -1658 | 9270  | 38  |
| H(44A) | 995  | 4499  | 8380  | 62  |
| H(44B) | 573  | 5256  | 8245  | 62  |
| H(44C) | 599  | 3832  | 8059  | 62  |
| H(43A) | 34   | 3091  | 8464  | 68  |
| H(43B) | -14  | 4562  | 8577  | 68  |

|        |      |       |      |     |
|--------|------|-------|------|-----|
| H(43C) | 43   | 3546  | 9010 | 68  |
| H(45A) | 417  | 1856  | 9291 | 48  |
| H(45B) | 760  | 2710  | 9630 | 48  |
| H(52A) | 2035 | -2334 | 8470 | 74  |
| H(52B) | 1996 | -917  | 8263 | 74  |
| H(52C) | 1708 | -2009 | 7980 | 74  |
| H(54A) | 1651 | 4256  | 9215 | 157 |
| H(54B) | 2125 | 4196  | 9472 | 157 |
| H(54C) | 1839 | 2988  | 9485 | 157 |
| H(51A) | 1485 | -3213 | 8803 | 84  |
| H(51B) | 1165 | -2847 | 8313 | 84  |
| H(51C) | 1097 | -2351 | 8828 | 84  |
| H(55A) | 2189 | 4137  | 8272 | 158 |
| H(55B) | 2303 | 4889  | 8778 | 158 |
| H(55C) | 1845 | 4922  | 8462 | 158 |
| H(56A) | 2295 | 1671  | 9115 | 208 |
| H(56B) | 2589 | 2854  | 9090 | 208 |
| H(56C) | 2396 | 2081  | 8604 | 208 |
| H(60A) | 831  | -356  | 7250 | 91  |
| H(60B) | 424  | -1045 | 7325 | 91  |
| H(60C) | 855  | -1408 | 7666 | 91  |
| H(59A) | 602  | -880  | 8431 | 82  |
| H(59B) | 165  | -622  | 8084 | 82  |
| H(59C) | 377  | 446   | 8459 | 82  |
| H(58A) | 331  | 2012  | 7831 | 85  |
| H(58B) | 124  | 1078  | 7399 | 85  |
| H(58C) | 537  | 1811  | 7373 | 85  |
| H(67)  | 3042 | 6468  | 1653 | 50  |
| H(65A) | 3229 | 9148  | 1350 | 48  |
| H(65B) | 3654 | 8849  | 1721 | 48  |
| H(63A) | 4137 | 10270 | 1889 | 80  |
| H(63B) | 4329 | 11463 | 1668 | 80  |
| H(63C) | 4448 | 10057 | 1537 | 80  |
| H(68)  | 3155 | 4466  | 1187 | 54  |
| H(70A) | 3986 | 5011  | 533  | 61  |
| H(70B) | 3662 | 3918  | 566  | 61  |

|        |      |       |      |     |
|--------|------|-------|------|-----|
| H(64A) | 4233 | 10564 | 649  | 79  |
| H(64B) | 4134 | 11969 | 803  | 79  |
| H(64C) | 3792 | 11167 | 442  | 79  |
| H(62A) | 3297 | 11428 | 985  | 83  |
| H(62B) | 3633 | 12325 | 1312 | 83  |
| H(62C) | 3445 | 11163 | 1557 | 83  |
| H(71A) | 2923 | 4708  | -426 | 131 |
| H(71B) | 2923 | 4778  | 143  | 131 |
| H(71C) | 3112 | 3570  | -73  | 131 |
| H(72A) | 3753 | 3729  | -306 | 136 |
| H(72B) | 3976 | 5074  | -290 | 136 |
| H(72C) | 3562 | 4817  | -684 | 136 |
| H(76A) | 3127 | 10145 | 225  | 106 |
| H(76B) | 2741 | 10254 | -221 | 106 |
| H(76C) | 3193 | 10351 | -318 | 106 |
| H(75A) | 2595 | 8511  | -836 | 101 |
| H(75B) | 2870 | 7258  | -763 | 101 |
| H(75C) | 3052 | 8557  | -918 | 101 |
| H(74A) | 2898 | 8037  | 477  | 108 |
| H(74B) | 2788 | 6925  | 84   | 108 |
| H(74C) | 2496 | 8135  | 52   | 108 |
| H(78A) | 4602 | 7895  | 1303 | 68  |
| H(78B) | 5009 | 7100  | 1303 | 68  |
| H(78C) | 4571 | 6454  | 1121 | 68  |
| H(80A) | 4701 | 5888  | 313  | 124 |
| H(80B) | 5156 | 6406  | 496  | 124 |
| H(80C) | 4877 | 6930  | 0    | 124 |
| H(79A) | 4983 | 9165  | 307  | 131 |
| H(79B) | 5265 | 8672  | 806  | 131 |
| H(79C) | 4876 | 9541  | 817  | 131 |

---





Table 1. Crystal data and structure refinement for compound 9—ccdc-936571.

|                                   |                                                  |                 |
|-----------------------------------|--------------------------------------------------|-----------------|
| Identification code               | compound 9—ccdc-936571                           |                 |
| Empirical formula                 | C <sub>14</sub> H <sub>28</sub> AlN <sub>3</sub> |                 |
| Formula weight                    | 265.37                                           |                 |
| Temperature                       | 149(2) K                                         |                 |
| Wavelength                        | 0.71073 Å                                        |                 |
| Crystal system                    | Monoclinic                                       |                 |
| Space group                       | P 21/c                                           |                 |
| Unit cell dimensions              | a = 11.6676(11) Å                                | α = 90°.        |
|                                   | b = 11.1033(9) Å                                 | β = 99.842(4)°. |
|                                   | c = 12.7218(11) Å                                | γ = 90°.        |
| Volume                            | 1623.8(2) Å <sup>3</sup>                         |                 |
| Z                                 | 4                                                |                 |
| Density (calculated)              | 1.085 Mg/m <sup>3</sup>                          |                 |
| Absorption coefficient            | 0.115 mm <sup>-1</sup>                           |                 |
| F(000)                            | 584                                              |                 |
| Crystal size                      | 0.40 x 0.30 x 0.30 mm <sup>3</sup>               |                 |
| Theta range for data collection   | 1.77 to 28.73°.                                  |                 |
| Index ranges                      | -15 ≤ h ≤ 15, -14 ≤ k ≤ 14, -17 ≤ l ≤ 17         |                 |
| Reflections collected             | 24380                                            |                 |
| Independent reflections           | 4194 [R(int) = 0.0288]                           |                 |
| Completeness to theta = 28.73°    | 99.9 %                                           |                 |
| Absorption correction             | Semi-empirical from equivalents                  |                 |
| Max. and min. transmission        | 0.9660 and 0.9590                                |                 |
| Refinement method                 | Full-matrix least-squares on F <sup>2</sup>      |                 |
| Data / restraints / parameters    | 4194 / 0 / 170                                   |                 |
| Goodness-of-fit on F <sup>2</sup> | 1.038                                            |                 |
| Final R indices [I > 2σ(I)]       | R1 = 0.0398, wR2 = 0.1091                        |                 |
| R indices (all data)              | R1 = 0.0484, wR2 = 0.1164                        |                 |
| Largest diff. peak and hole       | 0.441 and -0.172 e.Å <sup>-3</sup>               |                 |

Table 2. Atomic coordinates ( $\times 10^4$ ) and equivalent isotropic displacement parameters ( $\text{\AA}^2 \times 10^3$ ) for pei50\_0m.  $U(\text{eq})$  is defined as one third of the trace of the orthogonalized  $U^{ij}$  tensor.

|       | x       | y       | z        | $U(\text{eq})$ |
|-------|---------|---------|----------|----------------|
| Al(1) | 7729(1) | 6210(1) | 445(1)   | 33(1)          |
| N(1)  | 7395(1) | 8392(1) | -18(1)   | 38(1)          |
| N(2)  | 6376(1) | 6657(1) | 947(1)   | 30(1)          |
| N(3)  | 7021(1) | 4415(1) | 814(1)   | 29(1)          |
| C(1)  | 9188(1) | 6517(1) | 1440(1)  | 44(1)          |
| C(2)  | 7801(1) | 5834(1) | -1057(1) | 38(1)          |
| C(3)  | 8418(2) | 9153(2) | -17(1)   | 54(1)          |
| C(4)  | 6631(1) | 8474(1) | -1065(1) | 46(1)          |
| C(5)  | 6731(1) | 8796(1) | 813(1)   | 41(1)          |
| C(6)  | 5949(1) | 7800(1) | 1026(1)  | 36(1)          |
| C(7)  | 4892(1) | 7727(1) | 1366(1)  | 42(1)          |
| C(8)  | 4668(1) | 6486(1) | 1514(1)  | 37(1)          |
| C(9)  | 5602(1) | 5866(1) | 1248(1)  | 30(1)          |
| C(10) | 5944(1) | 4571(1) | 1293(1)  | 32(1)          |
| C(11) | 7780(1) | 3397(1) | 1309(1)  | 37(1)          |
| C(12) | 8294(1) | 3711(2) | 2460(1)  | 50(1)          |
| C(13) | 7089(2) | 2221(1) | 1284(1)  | 50(1)          |
| C(14) | 8739(1) | 3230(2) | 646(1)   | 53(1)          |

Table 3. Bond lengths [ $\text{\AA}$ ] and angles [ $^\circ$ ] for pei50\_0m.

---

|                  |            |
|------------------|------------|
| Al(1)-N(2)       | 1.8678(11) |
| Al(1)-C(1)       | 1.9698(13) |
| Al(1)-C(2)       | 1.9716(13) |
| Al(1)-N(3)       | 2.2382(11) |
| N(1)-C(3)        | 1.4628(19) |
| N(1)-C(4)        | 1.4743(17) |
| N(1)-C(5)        | 1.4827(17) |
| N(2)-C(9)        | 1.3612(15) |
| N(2)-C(6)        | 1.3727(16) |
| N(3)-C(10)       | 1.4979(14) |
| N(3)-C(11)       | 1.5057(16) |
| C(5)-C(6)        | 1.4884(19) |
| C(6)-C(7)        | 1.3777(19) |
| C(7)-C(8)        | 1.421(2)   |
| C(8)-C(9)        | 1.3793(17) |
| C(9)-C(10)       | 1.4906(18) |
| C(11)-C(14)      | 1.5225(19) |
| C(11)-C(12)      | 1.5255(19) |
| C(11)-C(13)      | 1.531(2)   |
|                  |            |
| N(2)-Al(1)-C(1)  | 114.99(6)  |
| N(2)-Al(1)-C(2)  | 124.45(5)  |
| C(1)-Al(1)-C(2)  | 118.96(6)  |
| N(2)-Al(1)-N(3)  | 78.55(4)   |
| C(1)-Al(1)-N(3)  | 109.16(5)  |
| C(2)-Al(1)-N(3)  | 95.34(5)   |
| C(3)-N(1)-C(4)   | 109.42(11) |
| C(3)-N(1)-C(5)   | 110.52(11) |
| C(4)-N(1)-C(5)   | 108.46(12) |
| C(9)-N(2)-C(6)   | 108.00(10) |
| C(9)-N(2)-Al(1)  | 124.40(9)  |
| C(6)-N(2)-Al(1)  | 127.52(9)  |
| C(10)-N(3)-C(11) | 113.05(9)  |
| C(10)-N(3)-Al(1) | 110.33(7)  |

|                   |            |
|-------------------|------------|
| C(11)-N(3)-Al(1)  | 123.01(8)  |
| N(1)-C(5)-C(6)    | 108.39(11) |
| N(2)-C(6)-C(7)    | 108.96(12) |
| N(2)-C(6)-C(5)    | 115.61(11) |
| C(7)-C(6)-C(5)    | 135.24(13) |
| C(6)-C(7)-C(8)    | 107.02(12) |
| C(9)-C(8)-C(7)    | 106.31(12) |
| N(2)-C(9)-C(8)    | 109.70(12) |
| N(2)-C(9)-C(10)   | 116.58(10) |
| C(8)-C(9)-C(10)   | 133.59(11) |
| C(9)-C(10)-N(3)   | 109.49(9)  |
| N(3)-C(11)-C(14)  | 107.14(11) |
| N(3)-C(11)-C(12)  | 109.63(11) |
| C(14)-C(11)-C(12) | 110.74(13) |
| N(3)-C(11)-C(13)  | 111.18(11) |
| C(14)-C(11)-C(13) | 108.62(12) |
| C(12)-C(11)-C(13) | 109.50(12) |

---

Symmetry transformations used to generate equivalent atoms:

Table 4. Anisotropic displacement parameters ( $\text{\AA}^2 \times 10^3$ ) for pei50\_0m. The anisotropic displacement factor exponent takes the form:  $-2\pi^2 [ h^2 a^{*2} U^{11} + \dots + 2 h k a^* b^* U^{12} ]$

|       | $U^{11}$ | $U^{22}$ | $U^{33}$ | $U^{23}$ | $U^{13}$ | $U^{12}$ |
|-------|----------|----------|----------|----------|----------|----------|
| Al(1) | 27(1)    | 48(1)    | 25(1)    | -5(1)    | 5(1)     | -5(1)    |
| N(1)  | 49(1)    | 37(1)    | 28(1)    | 0(1)     | 7(1)     | -5(1)    |
| N(2)  | 32(1)    | 33(1)    | 25(1)    | 0(1)     | 5(1)     | 0(1)     |
| N(3)  | 30(1)    | 33(1)    | 23(1)    | 1(1)     | 4(1)     | 0(1)     |
| C(1)  | 32(1)    | 54(1)    | 44(1)    | -3(1)    | 0(1)     | -9(1)    |
| C(2)  | 46(1)    | 42(1)    | 31(1)    | -3(1)    | 15(1)    | -6(1)    |
| C(3)  | 66(1)    | 47(1)    | 53(1)    | 2(1)     | 14(1)    | -17(1)   |
| C(4)  | 64(1)    | 43(1)    | 31(1)    | 5(1)     | 4(1)     | 2(1)     |
| C(5)  | 60(1)    | 32(1)    | 32(1)    | -3(1)    | 10(1)    | -1(1)    |
| C(6)  | 46(1)    | 34(1)    | 27(1)    | -3(1)    | 7(1)     | 5(1)     |
| C(7)  | 45(1)    | 47(1)    | 35(1)    | -6(1)    | 11(1)    | 11(1)    |
| C(8)  | 33(1)    | 52(1)    | 28(1)    | -5(1)    | 9(1)     | 1(1)     |
| C(9)  | 29(1)    | 40(1)    | 21(1)    | -1(1)    | 4(1)     | -1(1)    |
| C(10) | 30(1)    | 38(1)    | 30(1)    | 5(1)     | 8(1)     | -3(1)    |
| C(11) | 39(1)    | 35(1)    | 36(1)    | 2(1)     | 6(1)     | 6(1)     |
| C(12) | 53(1)    | 53(1)    | 40(1)    | 5(1)     | -8(1)    | 12(1)    |
| C(13) | 66(1)    | 35(1)    | 49(1)    | 6(1)     | 13(1)    | 2(1)     |
| C(14) | 51(1)    | 47(1)    | 66(1)    | 3(1)     | 23(1)    | 16(1)    |



### Supporting information

Aluminum Complexes Incorporating Symmetrical and Asymmetrical Tridentate Pincer Type Pyrrolyl Ligands  $[C_4H_2NH(2-CH_2NH^tBu)(5-CH_2NR_1R_2)]$  : Synthesis, Characterization and Reactivity Study

Pei-Hsin Liu,<sup>†</sup> Fu-Jung Chuang,<sup>†</sup> Cheng-Yi Tu,<sup>†</sup> Ching-Han Hu,<sup>†</sup> Tzu-Wei Lin,<sup>†</sup> Yu-Tang Wang,<sup>†</sup> Chia-Her Lin,<sup>‡</sup> Amitabha Datta,<sup>†</sup> Jui-Hsien Huang<sup>\*,†</sup>

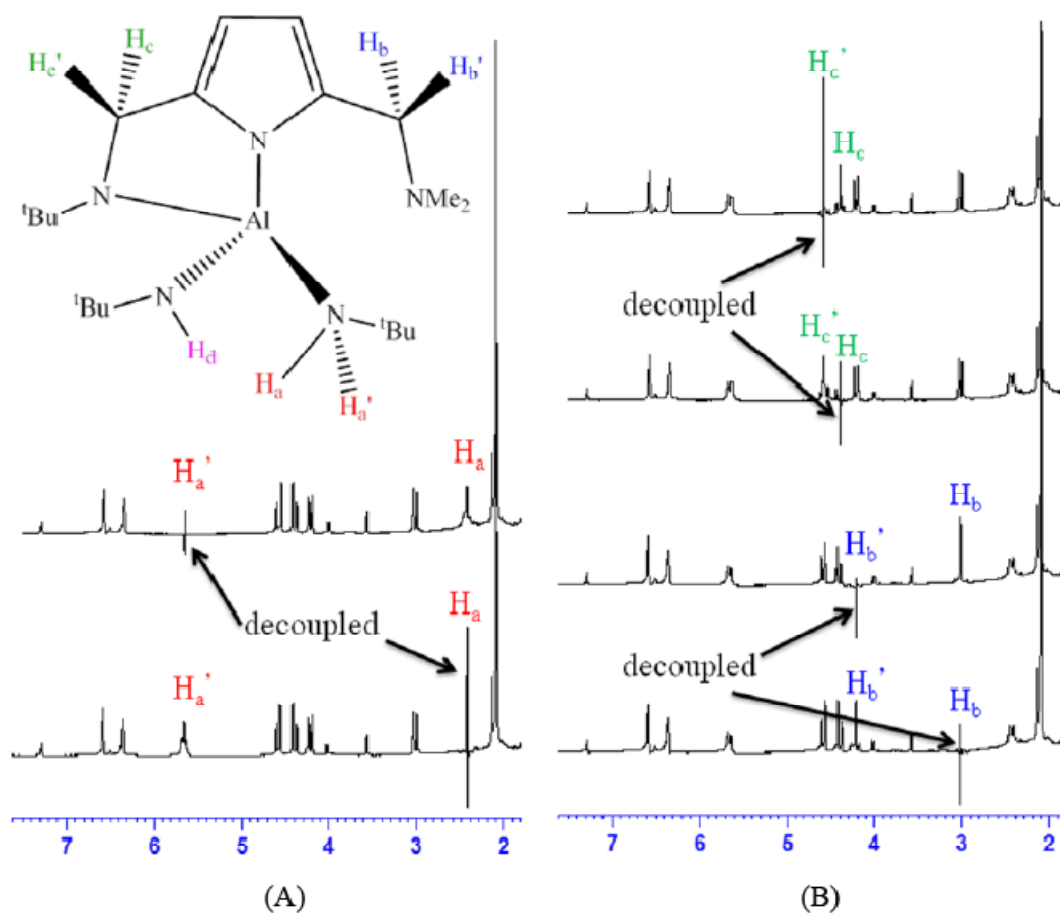

Homonuclear decoupling of <sup>1</sup>H NMR spectra of compound **8** in C<sub>6</sub>D<sub>6</sub> using 300 MHz NMR spectrometer. (A) Homonuclear decoupling of H<sub>a</sub> and H<sub>b</sub>; (B) Homonuclear decoupling of H<sub>c</sub>, H<sub>d</sub>, H<sub>e</sub>, and H<sub>f</sub>.
